# Supplementary material for: Genome-Wide Characterization of the MLO Gene Family in Cannabis sativa Reveals Two Genes as Strong Candidates for Powdery Mildew Susceptibility
Source: Front Plant Sci. 2021 Sep 13;12:729261. doi: 10.3389/fpls.2021.729261 (PMC8475652; doi:10.3389/fpls.2021.729261)
Supplement: Supplementary Table 1 — Members of the CsMLO gene family as predicted and manually curated in the CBDRx genome. [file Data_Sheet_5.xlsx]

## Sheet: Table S1
Supplementary Table S1. Members of the CsMLO gene family as predicted and manually curated in the CBDRx genome.
Gene	Clade	Chromosome	Strand	Start position	End position	Genomic length (bp)	Exons	Protein length (aa)	TMsb	Subcellular localizationc	Conserved aa/30d	Conserved aa/58e	Corresponding model initially predicted by Grassa et al. 2021	Mispredicted	Corresponding NCBI RefSeq	Mispredicted
CsMLO1-CBDRx	V	1	+	21631499	21636477	4979	15	555	7	Cell membrane	28	57	evm.model.02.729	No	XP_030489192.1	No
CsMLO2-CBDRx	I	1	-	84421095	84415528	5568	15	551	7	Cell membrane	30	58	evm.model.02.2262	Yes	XP_030489655.1	No
CsMLO3-CBDRx	VI	2	-	92590377	92584053	6325	15	547	7	Cell membrane	25	52	Not predicted	Not predicted	XP_030503273.1	No
CsMLO4-CBDRx	V	2	+	92612089	92622483	10395	15	631	7	Cell membrane	30	56	Not predicted	Not predicted	XP_030504631.1	No
CsMLO5-CBDRx	VI	3	-	42556462	42507454	49009	15	515	7	Cell membrane	30	58	evm.model.03.983_evm.model.03.984	No	XP_030492579.1	No
CsMLO6-CBDRx	II	4	-	29809460	29799903	9558	14	520	7	Cell membrane	30	57	evm.model.04.777	Yes	XP_030497393.1	No
CsMLO7-CBDRx	III	4	-	65440972	65435678	5295	15	549	7	Cell membrane	29	57	evm.model.04.1438	Yes	XP_030498821.1	No
CsMLO8-CBDRx	III	4	+	79070668	79074427	3760	15	542	7	Cell membrane	30	57	evm.model.04.1785	Yes	XP_030498064.1	No
CsMLO9-CBDRx	I	6	+	49150225	49156766	6542	15	568	7	Cell membrane	30	57	evm.model.08.1144	No	XP_030510576.1	No
CsMLO10-CBDRx	VII	7	-	23870119	23830282	39838	14	535	7	Cell membrane	30	57	evm.model.09.732	Yes	XP_030480074.1	No
CsMLO11-CBDRx	VII	8	-	51420983	51416370	4614	14	583	7	Cell membrane	30	58	evm.model.10.1409	Yes	XP_030481977.1	No
CsMLO12-CBDRx	I	X	+	443359	447357	3999	14	558	7	Cell membrane	29	55	evm.model.01.39	Yes	XP_030485938.1	No
CsMLO13-CBDRx	II	X	+	10840654	10844220	3567	14	508	7	Cell membrane	30	58	evm.model.01.659	No	XP_030500730.1	No
CsMLO14-CBDRx	II	X	+	89459459	89463372	3914	12	516	7	Cell membrane	30	56	evm.model.01.2475	No	XP_030480106.1	No
CsMLO15-CBDRxa	IV	N/A	N/A	N/A	N/A	N/A	N/A	N/A	N/A	N/A	N/A	N/A	N/A	N/A	N/A	N/A
a CsMLO15-CBDRx is not predicted in the CBDRx genome, as compared to the other four genomes analysed.
b Number of transmembrane domains (TMs) in the predicted protein, as determined by the CCTOP online prediction server (Dobson et al., 2015).
c Subcellular localization as predicted by three online prediction servers: Plant-mPLoc (Chou and Shen, 2010), YLoc-HighRes (Briesmeister et al., 2010), and DeepLoc 1.0 (Armenteros et al., 2017).
d Number of conserved amino acids out of the 30 identified in Elliott et al., 2005.
e Number of conserved amino acids out of the 58 identified in Kusch et al., 2016.

## Sheet: Table S2
Supplementary Table S2. Members of the CsMLO gene family as predicted and manually curated in the Jamaican Lion (female) genome.
Gene	Clade	Chromosomea	Strand	Start position	End position	Genomic length (bp)	Exons	Protein length (aa)	TMsb	Subcellular localizationc	Conserved aa/30d	Conserved aa/58e	Corresponding model initially predicted by McKernan et al. 2020	Mispredicted
CsMLO1-JL_A	V	contig504	-	2740611	2735320	5292	15	555	7	Cell membrane	30	57	KAF4389119.1	Yes
CsMLO1-JL_B	V	contig856	-	5621443	5616456	4988	15	555	7	Cell membrane	30	57	KAF4393571.1	Yes
CsMLO2-JL	I	contig952	-	834608	829039	5570	15	551	7	Cell membrane	30	58	KAF4367122.1	Yes
CsMLO3-JL	VI	contig802	-	767974	774165	6192	15	545	7	Cell membrane	29	55	KAF4354655.1	Yes
CsMLO4-JL	V	contig802	+	799635	809299	9665	15	631	7	Cell membrane	30	58	KAF4354658.1	Yes
CsMLO5-JL	VI	contig460	-	1318269	1268597	49673	15	515	7	Cell membrane	30	56	Split in two: KAF4382162.1 and KAF4382161.1	Yes
CsMLO6-JL	II	contig63	+	776368	784676	8309	14	520	7	Cell membrane	30	58	KAF4377102.1	No
CsMLO7-JL	III	contig63	-	1481307	1475981	5327	15	549	7	Cell membrane	30	57	KAF4377122.1	No
CsMLO8-JL	III	contig678	-	568395	564596	3800	15	542	7	Cell membrane	29	57	KAF4375075.1	Yes
CsMLO9-JL	I	contig2022	-	663968	657957	6012	15	568	7	Cell membrane	30	57	KAF4357174.1	Yes
CsMLO10-JL_A	VII	contig985	+	5331675	5370657	38983	14	535	7	Cell membrane	30	56	Split in two: KAF4393115.1 and KAF4393116.1	Yes
CsMLO10-JL_B	VII	contig1663	-	2022723	1994842	27882	14	535	7	Cell membrane	30	56	Split in two: KAF4371615.1 and KAF4371614.1	Yes
CsMLO11-JL	VII	contig1712	+	46928	51479	4552	14	583	7	Cell membrane	25	52	KAF4351989.1	Yes
CsMLO12-JL	I	contig81	+	367827	377857	10031	14	558	7	Cell membrane	28	57	KAF4373825.1	Yes
CsMLO13-JL	II	contig89	-	1948749	1945183	3567	14	508	7	Cell membrane	30	57	Not predicted	Yes
CsMLO14-JL	II	contig604	-	1288310	1284368	3943	12	514	7	Cell membrane	30	58	KAF4377261.1	No
CsMLO15-JL	IV	contig608	-	86116	72832	13285	13	547	7	Cell membrane	30	57	Split in three: KAF4349387.1 , KAF4349386.1 and KAF4349384.1	Yes
a Jamaican Lion (female)'s predicted genes did not mention information on chromosomal localization, therefore respective contigs are mentionned here instead.
b Number of transmembrane domains (TMs) in the predicted protein, as determined by the CCTOP online prediction server (Dobson et al., 2015).
c Subcellular localization as predicted by three online prediction servers: Plant-mPLoc (Chou and Shen, 2010), YLoc-HighRes (Briesmeister et al., 2010), and DeepLoc 1.0 (Armenteros et al., 2017).
d Number of conserved amino acids out of the 30 identified in Elliott et al., 2005.
e Number of conserved amino acids out of the 58 identified in Kusch et al., 2016.

## Sheet: Table S3
Supplementary Table S3. Members of the CsMLO gene family as predicted and manually curated in the Jamaican Lion (male) genome.
Gene	Clade	Chromosomea	Strand	Start position	End position	Genomic length (bp)	Exons	Protein length (aa)	TMsb	Subcellular localizationc	Conserved aa/30d	Conserved aa/58e	Corresponding model initially predicted by McKernan et al. 2020	Mispredicted
CsMLO1-JLm_A	V	lcl|112F_arrow	-	654550	649556	4995	15	555	7	Cell membrane	30	57	KAF4382237.1	Yes
CsMLO1-JLm_B	V	lcl|342F_arrow	-	634776	629789	4988	15	555	7	Cell membrane	30	57	KAF4361892.1	Yes
CsMLO2-JLm	I	lcl|23F_arrow	-	5370096	5364527	5570	15	551	7	Cell membrane	30	58	KAF4400088.1	Yes
CsMLO3-JLm	VI	lcl|60F_arrow	+	700531	706722	6192	15	545	7	Cell membrane	29	55	KAF4392359.1	Yes
CsMLO4-JLm	V	lcl|60F_arrow	-	675054	665390	9665	15	631	7	Cell membrane	30	58	KAF4392373.1	Yes
CsMLO5-JLm	VI	lcl|3F_arrow	+	13694396	13748298	53903	15	515	7	Cell membrane	30	56	KAF4403503.1	Yes
CsMLO6-JLm	II	lcl|2F_arrow	+	10117379	10125689	8311	14	520	7	Cell membrane	30	58	KAF4403659.1	No
CsMLO7-JLm	III	lcl|2F_arrow	-	10822345	10817020	5326	15	549	7	Cell membrane	30	57	KAF4403683.1	No
CsMLO8-JLm	III	lcl|8F_arrow	-	2816552	2812752	3801	15	542	7	Cell membrane	29	57	KAF4401980.1	Yes
CsMLO9-JLm_A	I	lcl|283F_arrow	+	679999	686010	6012	15	568	7	Cell membrane	30	57	KAF4366356.1	Yes
CsMLO9-JLm_B	I	lcl|544F_arrow	-	136772	130231	6542	15	568	7	Cell membrane	30	57	KAF4352270.1	Yes
CsMLO10-JLm	VII	lcl|29F_arrow	-	5546884	5507897	38988	14	535	7	Cell membrane	30	56	Split in three: KAF4398738.1 , KAF4347655.1 and KAF4398736.1	Yes
CsMLO11-JLm	VII	lcl|89F_arrow	-	1403407	1398856	4552	14	583	7	Cell membrane	25	52	KAF4386515.1	Yes
CsMLO12-JLm_A	I	lcl|156F_arrow	-	1157034	1153033	4002	14	558	7	Cell membrane	28	57	KAF4377640.1	Yes
CsMLO12-JLm_B	I	lcl|296F_arrow	-	670567	666569	3999	14	558	7	Cell membrane	28	57	KAF4364719.1	Yes
CsMLO13-JLm_A	II	lcl|210F_arrow	+	817217	820785	3569	14	508	7	Cell membrane	30	57	Not predicted	Yes
CsMLO13-JLm_B	II	lcl|990F_arrow	-	8914	5316	3599	14	508	7	Cell membrane	30	57	KAF4346523.1	Yes
CsMLO14-JLm	II	lcl|247F_arrow	+	556549	560491	3943	12	514	7	Cell membrane	30	58	KAF4368615.1	No
CsMLO15-JLm	IV	lcl|222F_arrow	-	388924	375642	13283	13	547	7	Cell membrane	30	57	KAF4370487.1	Yes
a Jamaican Lion (male)'s predicted genes did not mention information on chromosomal localization, therefore respective contigs are mentionned here instead.
b Number of transmembrane domains (TMs) in the predicted protein, as determined by the CCTOP online prediction server (Dobson et al., 2015).
c Subcellular localization as predicted by three online prediction servers: Plant-mPLoc (Chou and Shen, 2010), YLoc-HighRes (Briesmeister et al., 2010), and DeepLoc 1.0 (Armenteros et al., 2017).
d Number of conserved amino acids out of the 30 identified in Elliott et al., 2005.
e Number of conserved amino acids out of the 58 identified in Kusch et al., 2016.

## Sheet: Table S4
Supplementary Table S4. Members of the CsMLO gene family as predicted and manually curated in the Purple Kush genome.
Gene	Clade	Chromosomea	Strand	Start position	End position	Genomic length (bp)	Frameshifts (bp)b	Corrected genomic length (bp)c	Exons	Protein length (aa)	TMsd	Subcellular localizatione	Conserved aa/30f	Conserved aa/58g	Partial sequencesh
CsMLO1-PK_A	V	1	-	45098499	45093248	5252	-1	5251	15	555	7	Cell membrane	30	57	N/A
CsMLO1-PK_B_partial	V	AGQN03004889.1	+	1	2506	2506	0	2506	9	343	4	Cell membrane, Chloroplast, Nucleus	19*	35	incomplete in N-terminal
CsMLO2-PK_partial	I	AGQN03002154.1	-	21719	16462	5258	+1	5259	14	423	7	Cell membrane	29*	55	incomplete in C-terminal
CsMLO3-PK	VI	2	-	1456278	1449911	6368	+1	6369	15	545	7	Cell membrane	29	55	N/A
CsMLO4-PK	V	AGQN03009267.1	-	14818	4456	10363	+1	10364	15	632	7	Cell membrane	30	58	N/A
CsMLO5-PK_A_partial	VI	3	-	52026651	52005599	21053	0	21053	12	381	6	Cell membrane, ER	26*	48	incomplete in C-terminal
CsMLO5-PK_B	VI	3	+	27803857	27854313	50457	0	50457	15	515	7	Cell membrane	30	56	N/A
CsMLO6-PK	II	AGQN03000322.1	+	71434	79631	8198	0	8198	14	520	7	Cell membrane	30	58	N/A
CsMLO7-PK	III	AGQN03006521.1	+	12463	17762	5300	0	5300	15	549	7	Cell membrane	30	57	N/A
CsMLO8-PK	III	4	-	10553761	10549996	3766	0	3766	15	542	7	Cell membrane	29	57	N/A
CsMLO9-PK_A	I	6	+	12012962	12019479	6518	0	6518	15	568	7	Cell membrane	30	57	N/A
CsMLO9-PK_B	I	7	-	27478752	27472743	6010	-2	6008	15	568	7	Cell membrane	30	57	N/A
CsMLO10-PK	VII	7	+	34612495	34652435	39941	0	39941	14	535	7	Cell membrane	30	56	N/A
CsMLO11-PK	VII	8	-	37826721	37822094	4628	+4 and -1	4631	14	583	7	Cell membrane	25	52	N/A
CsMLO12-PK	I	AGQN03000195.1	+	201585	205576	3992	+1	3993	14	558	7	Cell membrane	28	57	N/A
CsMLO13-PK	II	X	+	22017931	22021502	3572	0	3572	14	508	7	Cell membrane	30	57	N/A
CsMLO14-PK	II	4	-	44911635	44907693	3943	0	3943	12	514	7	Cell membrane	30	58	N/A
CsMLO15-PK	IV	7	-	7070801	7057519	13283	0	13283	13	547	7	Cell membrane	30	57	N/A
a Some of Purple Kush's genes/sequences were not distributed on a chromosome, but on a separate contig, which are mentionned here instead.
b Certain sequences in the Purple Kush genomes contained frameshifts. The number of base pairs deletions (+) and insertions (-) are noted here.
c Genomic length after the frameshifts were corrected through manual curation. The base pair deletions (+) were added to the sequence and the base pair insertions (-) were removed from the sequence.
d Number of transmembrane domains (TMs) in the predicted protein, as determined by the CCTOP online prediction server (Dobson et al., 2015).
e Subcellular localization as predicted by three online prediction servers: Plant-mPLoc (Chou and Shen, 2010), YLoc-HighRes (Briesmeister et al., 2010), and DeepLoc 1.0 (Armenteros et al., 2017).
f Number of conserved amino acids out of the 30 identified in Elliott et al., 2005.
g Number of conserved amino acids out of the 58 identified in Kusch et al., 2016.
h Some sequences identified in the Purple Kush genome were incomplete. Sequences incomplete in N-terminal did not possess a START codon and sequences incomplete in C-terminal did not possess a STOP codon.

## Sheet: Table S5
Supplementary Table S5. Members of the CsMLO gene family as predicted and manually curated in the Finola genome.
Gene	Clade	Chromosomea	Strand	Start position	End position	Genomic length (bp)	Frameshifts (bp)b	Corrected genomic length (bp)c	Exons	Protein length (aa)	TMsd	Subcellular localizatione	Conserved aa/30f	Conserved aa/58g	Partial sequencesh
CsMLO1-FN	V	1	-	23415592	23410611	4982	+3 and -1	4984	15	554	7	Cell membrane	30	57	N/A
CsMLO2-FN	I	1	+	68466870	68472476	5607	+1	5608	15	551	7	Cell membrane	30	58	N/A
CsMLO3-FN_A	VI	2	+	92667353	92674192	6840	+4	6844	15	544	7	Cell membrane	29	55	N/A
CsMLO3-FN_B_partial	VI	2	+	92656266	92661361	5096	+3	5099	11i	391	5	Cell membrane, ER	25	46	incomplete in C-terminal
CsMLO4-FN	V	2	-	92626721	92616646	10076	+2	10078	15	628	7	Cell membrane	30	58	N/A
CsMLO5-FN	VI	3	+	72351289	72407303	56015	+1	56016	15	515	7	Cell membrane	30	56	N/A
CsMLO6-FN	II	4	+	38689131	38695458	6328	+4	6332	14	520	7	Cell membrane	30	58	N/A
CsMLO7-FN	III	4	-	35789072	35783782	5291	0	5291	15	549	7	Cell membrane	30	57	N/A
CsMLO8-FN	III	4	-	64182196	64178379	3818	0	3818	15	542	7	Cell membrane	29	57	N/A
CsMLO9-FN	I	6	+	76586431	76592764	6334	+1 and -2	6333	15	568	7	Cell membrane	30	57	N/A
CsMLO10-FN_A_partial	VII	2	+	6379477	6380163	687	0	687	7	229	3	Cell membrane	16	30	incomplete in C-terminal
CsMLO10-FN_B	VII	7	-	60484928	60456562	28367	-12	28355	14	535	7	Cell membrane	30	56	N/A
CsMLO11-FN	VII	8	-	8908283	8903809	4475	0	4475	14	583	7	Cell membrane	25	52	N/A
CsMLO12-FN	I	QKVJ02000730.1	-	285930	281931	4000	0	4000	14	558	7	Cell membrane	28	57	N/A
CsMLO13-FN_A	II	X	+	24280135	24284864	4730	+2 and -1	4731	14	508	7	Cell membrane	30	57	N/A
CsMLO13-FN_B	II	X	+	26267467	26271000	3534	+5 and -2	3537	14	508	7	Cell membrane	30	57	N/A
CsMLO14-FN	II	1	+	58544314	58548247	3934	+1 and -1	3934	12	515	7	Cell membrane	30	58	N/A
CsMLO15-FN	IV	QKVJ02003327.1	+	24687	44345	19659	+6	19665	13	546	7	Cell membrane	30	57	N/A
a Some Finola genes/sequences were not distributed on a chromosome, but on a separate contig, which are mentionned here instead.
b Certain sequences in the Finola genomes contained frameshifts. The number of base pairs deletions (+) and insertions (-) are noted here.
c Genomic length after the frameshifts were corrected through manual curation. The base pair deletions (+) were added to the sequence and the base pair insertions (-) were removed from the sequence.
d Number of transmembrane domains (TMs) in the predicted protein, as determined by the CCTOP online prediction server (Dobson et al., 2015).
e Subcellular localization as predicted by three online prediction servers: Plant-mPLoc (Chou and Shen, 2010), YLoc-HighRes (Briesmeister et al., 2010), and DeepLoc 1.0 (Armenteros et al., 2017).
f Number of conserved amino acids out of the 30 identified in Elliott et al., 2005.
g Number of conserved amino acids out of the 58 identified in Kusch et al., 2016.
h Some sequences identified in the Purple Kush genome were incomplete. Sequences incomplete in N-terminal did not possess a START codon and sequences incomplete in C-terminal did not possess a STOP codon.
i As this gene is partial, one additional exon was present but incomplete.

## Sheet: Table S6
Supplementary Table S6. Plant cis-acting regulatory elements identified in CsMLOs across five distinct cultivars.
Gene	Motif	Sequence	Position	Length	Strand	Species	Description
112F_arrow	TCT-motif	TCTTAC	585	6	-	Arabidopsis thaliana	part of a light responsive element
112F_arrow	ABRE	ACGTG	1442	5	-	Arabidopsis thaliana	cis-acting element involved in the abscisic acid responsiveness
112F_arrow	ABRE	ACGTG	1502	5	+	Arabidopsis thaliana	cis-acting element involved in the abscisic acid responsiveness
112F_arrow	ABRE	ACGTG	1557	5	-	Arabidopsis thaliana	cis-acting element involved in the abscisic acid responsiveness
112F_arrow	HD-Zip 3	GTAAT(G/C)ATTAC	1216	9.5	-	Arabidopsis thaliana	protein binding site
112F_arrow	Myc	TCTCTTA	1483	7	-	Arabidopsis thaliana
112F_arrow	chs-CMA1a	TTACTTAA	1272	8	+	Daucus carota	part of a light responsive element
112F_arrow	Box 4	ATTAAT	627	6	+	Petroselinum crispum	part of a conserved DNA module involved in light responsiveness
112F_arrow	Box 4	ATTAAT	800	6	+	Petroselinum crispum	part of a conserved DNA module involved in light responsiveness
112F_arrow	Box 4	ATTAAT	962	6	+	Petroselinum crispum	part of a conserved DNA module involved in light responsiveness
112F_arrow	Box 4	ATTAAT	1114	6	-	Petroselinum crispum	part of a conserved DNA module involved in light responsiveness
112F_arrow	Box 4	ATTAAT	1746	6	-	Petroselinum crispum	part of a conserved DNA module involved in light responsiveness
112F_arrow	TCA	TCATCTTCAT	107	9	+	Pisum sativum
112F_arrow	G-Box	CACGTT	1442	6	+	Pisum sativum	cis-acting regulatory element involved in light responsiveness
112F_arrow	G-Box	CACGTT	1501	6	-	Pisum sativum	cis-acting regulatory element involved in light responsiveness
112F_arrow	MYB	CAACAG	387	6	-	Arabidopsis thaliana
112F_arrow	MYB	CAACAG	945	6	+	Arabidopsis thaliana
112F_arrow	MYB	CAACCA	1152	6	-	Arabidopsis thaliana
112F_arrow	CARE	CAACTCAC	708	8	+	Oryza sativa
112F_arrow	CCGTCC motif	CCGTCC	1125	6	+	Nicotiana tabacum
112F_arrow	TGA-element	AACGAC	190	6	-	Brassica oleracea	auxin-responsive element
112F_arrow	TGA-element	AACGAC	1474	6	+	Brassica oleracea	auxin-responsive element
112F_arrow	AE-box	AGAAACAA	1950	8	+	Arabidopsis thaliana	part of a module for light response
112F_arrow	I-box	AGATAAGG	22	8	+	Triticum aestivum	part of a light responsive element
112F_arrow	I-box	gGATAAGGTG	1314	9	+	Zea mays	part of a light responsive element
112F_arrow	I-box	cCATATCCAAT	1347	10	-	Flaveria trinervia	part of a light responsive element
112F_arrow	LTR	CCGAAA	332	6	-	Hordeum vulgare	cis-acting element involved in low-temperature responsiveness
112F_arrow	GATA-motif	AAGATAAGATT	792	10	+	Arabidopsis thaliana	part of a light responsive element
112F_arrow	WUN-motif	AAATTTCCT	27	9	-	Brassica oleracea	wound-responsive element
112F_arrow	WUN-motif	AAATTACT	408	8	+	Nicotiana glutinosa
112F_arrow	WUN-motif	TTATTACAT	829	9	-	Nicotiana glutinosa
112F_arrow	WUN-motif	AAATTACT	1269	8	+	Nicotiana glutinosa
112F_arrow	WUN-motif	AAATTACT	1972	8	+	Nicotiana glutinosa
112F_arrow	circadian	CAAAGATATC	981	9	+	Lycopersicon esculentum	cis-acting regulatory element involved in circadian control
112F_arrow	3-AF1 binding site	TAAGAGAGGAA	88	10	-	Solanum tuberosum	light responsive element
112F_arrow	AuxRR-core	GGTCCAT	149	7	+	Nicotiana tabacum	cis-acting regulatory element involved in auxin responsiveness
112F_arrow	CCGTCC-box	CCGTCC	1125	6	+	Petroselinum hortense
112F_arrow	ARE	AAACCA	354	6	-	Zea mays	cis-acting regulatory element essential for the anaerobic induction
112F_arrow	ARE	AAACCA	851	6	+	Zea mays	cis-acting regulatory element essential for the anaerobic induction
112F_arrow	W box	TTGACC	35	6	+	Arabidopsis thaliana
112F_arrow	W box	TTGACC	1587	6	-	Arabidopsis thaliana
112F_arrow	Myb-binding site	CAACAG	387	6	-	Nicotiana tabacum
112F_arrow	Myb-binding site	CAACAG	945	6	+	Nicotiana tabacum
112F_arrow	AAGAA-motif	GAAAGAA	589	7	+	Avena sativa
112F_arrow	AAGAA-motif	GAAAGAA	786	7	+	Avena sativa
112F_arrow	AAGAA-motif	GAAAGAA	790	7	+	Avena sativa
112F_arrow	AAGAA-motif	GAAAGAA	1513	7	+	Avena sativa
112F_arrow	Unnamed__4	CTCC	55	4	-	Petroselinum hortense
112F_arrow	Unnamed__4	CTCC	58	4	-	Petroselinum hortense
112F_arrow	Unnamed__4	CTCC	161	4	-	Petroselinum hortense
112F_arrow	Unnamed__4	CTCC	215	4	-	Petroselinum hortense
112F_arrow	Unnamed__4	CTCC	290	4	-	Petroselinum hortense
112F_arrow	Unnamed__4	CTCC	325	4	+	Petroselinum hortense
112F_arrow	Unnamed__4	CTCC	895	4	+	Petroselinum hortense
112F_arrow	Unnamed__4	CTCC	1148	4	+	Petroselinum hortense
112F_arrow	Unnamed__4	CTCC	1184	4	+	Petroselinum hortense
112F_arrow	Unnamed__4	CTCC	1357	4	-	Petroselinum hortense
112F_arrow	Unnamed__4	CTCC	1360	4	-	Petroselinum hortense
112F_arrow	Unnamed__4	CTCC	1437	4	+	Petroselinum hortense
112F_arrow	Unnamed__4	CTCC	1684	4	-	Petroselinum hortense
112F_arrow	G-box	CACGTC	1557	6	+	Zea mays	cis-acting regulatory element involved in light responsiveness
112F_arrow	O2-site	GATGA(C/T)(A/G)TG(A/G)	491	8	+	Zea mays	cis-acting regulatory element involved in zein metabolism regulation
112F_arrow	MYC	CATTTG	124	6	+	Arabidopsis thaliana
112F_arrow	MYC	CATTTG	450	6	-	Arabidopsis thaliana
112F_arrow	MYC	CATTTG	872	6	-	Arabidopsis thaliana
112F_arrow	MYC	CATTTG	930	6	-	Arabidopsis thaliana
112F_arrow	MYC	CATTTG	1508	6	+	Arabidopsis thaliana
112F_arrow	MYC	CATTTG	1664	6	+	Arabidopsis thaliana
112F_arrow	MYC	CATTTG	1732	6	-	Arabidopsis thaliana
112F_arrow	TATA-box	TATAA	96	5	-	Arabidopsis thaliana	core promoter element around -30 of transcription start
112F_arrow	TATA-box	TATA	97	4	+	Arabidopsis thaliana	core promoter element around -30 of transcription start
112F_arrow	TATA-box	ATATAT	441	6	+	Brassica napus	core promoter element around -30 of transcription start
112F_arrow	TATA-box	TATA	442	4	+	Arabidopsis thaliana	core promoter element around -30 of transcription start
112F_arrow	TATA-box	TATA	537	4	+	Arabidopsis thaliana	core promoter element around -30 of transcription start
112F_arrow	TATA-box	ATTATA	631	6	+	Brassica napus	core promoter element around -30 of transcription start
112F_arrow	TATA-box	TATAA	632	5	-	Arabidopsis thaliana	core promoter element around -30 of transcription start
112F_arrow	TATA-box	TATA	633	4	+	Arabidopsis thaliana	core promoter element around -30 of transcription start
112F_arrow	TATA-box	ATATAT	682	6	+	Brassica napus	core promoter element around -30 of transcription start
112F_arrow	TATA-box	TATA	683	4	+	Arabidopsis thaliana	core promoter element around -30 of transcription start
112F_arrow	TATA-box	ATTATA	686	6	+	Brassica napus	core promoter element around -30 of transcription start
112F_arrow	TATA-box	TATAA	687	5	-	Arabidopsis thaliana	core promoter element around -30 of transcription start
112F_arrow	TATA-box	TATA	688	4	+	Arabidopsis thaliana	core promoter element around -30 of transcription start
112F_arrow	TATA-box	ATATAT	1006	6	-	Brassica napus	core promoter element around -30 of transcription start
112F_arrow	TATA-box	TATATA	1007	6	-	Arabidopsis thaliana	core promoter element around -30 of transcription start
112F_arrow	TATA-box	ATATAT	1008	6	-	Brassica napus	core promoter element around -30 of transcription start
112F_arrow	TATA-box	TATATA	1009	6	-	Arabidopsis thaliana	core promoter element around -30 of transcription start
112F_arrow	TATA-box	ATATAT	1010	6	-	Brassica napus	core promoter element around -30 of transcription start
112F_arrow	TATA-box	TATA	1011	4	-	Arabidopsis thaliana	core promoter element around -30 of transcription start
112F_arrow	TATA-box	ATTATA	1035	6	+	Brassica napus	core promoter element around -30 of transcription start
112F_arrow	TATA-box	TATAA	1036	5	-	Arabidopsis thaliana	core promoter element around -30 of transcription start
112F_arrow	TATA-box	TATA	1037	4	-	Arabidopsis thaliana	core promoter element around -30 of transcription start
112F_arrow	TATA-box	ATATAT	1054	6	-	Brassica napus	core promoter element around -30 of transcription start
112F_arrow	TATA-box	TATATA	1055	6	-	Arabidopsis thaliana	core promoter element around -30 of transcription start
112F_arrow	TATA-box	ATATAT	1056	6	-	Brassica napus	core promoter element around -30 of transcription start
112F_arrow	TATA-box	TATATA	1057	6	-	Arabidopsis thaliana	core promoter element around -30 of transcription start
112F_arrow	TATA-box	ATATAT	1058	6	-	Brassica napus	core promoter element around -30 of transcription start
112F_arrow	TATA-box	TATATA	1059	6	-	Arabidopsis thaliana	core promoter element around -30 of transcription start
112F_arrow	TATA-box	TATA	1061	4	-	Arabidopsis thaliana	core promoter element around -30 of transcription start
112F_arrow	TATA-box	TATAAAA	1375	7	-	Pisum sativum	core promoter element around -30 of transcription start
112F_arrow	TATA-box	TATAAA	1376	6	-	Helianthus annuus	core promoter element around -30 of transcription start
112F_arrow	TATA-box	TATATAA	1377	7	-	Arabidopsis thaliana	core promoter element around -30 of transcription start
112F_arrow	TATA-box	TATATA	1378	6	-	Arabidopsis thaliana	core promoter element around -30 of transcription start
112F_arrow	TATA-box	ATATAT	1379	6	-	Brassica napus	core promoter element around -30 of transcription start
112F_arrow	TATA-box	TATA	1380	4	-	Arabidopsis thaliana	core promoter element around -30 of transcription start
112F_arrow	TATA-box	TATA	1467	4	-	Arabidopsis thaliana	core promoter element around -30 of transcription start
112F_arrow	TATA-box	TATATAA	1701	7	-	Arabidopsis thaliana	core promoter element around -30 of transcription start
112F_arrow	TATA-box	TATATA	1702	6	-	Arabidopsis thaliana	core promoter element around -30 of transcription start
112F_arrow	TATA-box	ATATAT	1703	6	-	Brassica napus	core promoter element around -30 of transcription start
112F_arrow	TATA-box	TATA	1704	4	-	Arabidopsis thaliana	core promoter element around -30 of transcription start
112F_arrow	TATA-box	ATATAT	1757	6	-	Brassica napus	core promoter element around -30 of transcription start
112F_arrow	TATA-box	TATATA	1758	6	-	Arabidopsis thaliana	core promoter element around -30 of transcription start
112F_arrow	TATA-box	TATA	1760	4	-	Arabidopsis thaliana	core promoter element around -30 of transcription start
112F_arrow	TATA-box	TATA	1835	4	-	Arabidopsis thaliana	core promoter element around -30 of transcription start
112F_arrow	TATA-box	ATATAT	1885	6	-	Brassica napus	core promoter element around -30 of transcription start
112F_arrow	TATA-box	TATATA	1886	6	-	Arabidopsis thaliana	core promoter element around -30 of transcription start
112F_arrow	TATA-box	ATATAA	1887	6	+	Brassica oleracea	core promoter element around -30 of transcription start
112F_arrow	TATA-box	TATA	1888	4	-	Arabidopsis thaliana	core promoter element around -30 of transcription start
112F_arrow	TATA-box	TATA	1923	4	-	Arabidopsis thaliana	core promoter element around -30 of transcription start
112F_arrow	TATA-box	ATATAT	1987	6	-	Brassica napus	core promoter element around -30 of transcription start
112F_arrow	TATA-box	TATATA	1988	6	-	Arabidopsis thaliana	core promoter element around -30 of transcription start
112F_arrow	TATA-box	ATATAA	1989	6	+	Brassica oleracea	core promoter element around -30 of transcription start
112F_arrow	TATA-box	TATA	1990	4	-	Arabidopsis thaliana	core promoter element around -30 of transcription start
112F_arrow	TATA-box	ATTATA	1995	6	+	Brassica napus	core promoter element around -30 of transcription start
112F_arrow	TATA-box	TATAA	1996	5	-	Arabidopsis thaliana	core promoter element around -30 of transcription start
112F_arrow	TATA-box	TATA	1997	4	-	Arabidopsis thaliana	core promoter element around -30 of transcription start
112F_arrow	MBS	CAACTG	234	6	-	Arabidopsis thaliana	MYB binding site involved in drought-inducibility
112F_arrow	TATA	TATAAAAT	1374	8	-	Arabidopsis thaliana
112F_arrow	AT~TATA-box	TATATA	1007	6	-	Arabidopsis thaliana
112F_arrow	AT~TATA-box	TATATA	1009	6	-	Arabidopsis thaliana
112F_arrow	AT~TATA-box	TATATA	1055	6	-	Arabidopsis thaliana
112F_arrow	AT~TATA-box	TATATA	1057	6	-	Arabidopsis thaliana
112F_arrow	AT~TATA-box	TATATA	1059	6	-	Arabidopsis thaliana
112F_arrow	AT~TATA-box	TATATAAA	1376	8	-	Arabidopsis thaliana
112F_arrow	AT~TATA-box	TATATA	1378	6	-	Arabidopsis thaliana
112F_arrow	AT~TATA-box	TATATA	1702	6	-	Arabidopsis thaliana
112F_arrow	AT~TATA-box	TATATA	1758	6	-	Arabidopsis thaliana
112F_arrow	AT~TATA-box	TATATA	1886	6	-	Arabidopsis thaliana
112F_arrow	AT~TATA-box	TATATA	1988	6	-	Arabidopsis thaliana
112F_arrow		motif_sequence	161	4	-	organism	short_function
112F_arrow		motif_sequence	240	4	+	organism	short_function
112F_arrow		motif_sequence	261	4	-	organism	short_function
112F_arrow		motif_sequence	274	4	-	organism	short_function
112F_arrow		motif_sequence	644	4	-	organism	short_function
112F_arrow		motif_sequence	739	4	+	organism	short_function
112F_arrow		motif_sequence	808	4	-	organism	short_function
112F_arrow		motif_sequence	890	4	+	organism	short_function
112F_arrow		motif_sequence	1137	4	-	organism	short_function
112F_arrow		motif_sequence	1146	4	+	organism	short_function
112F_arrow		motif_sequence	1182	4	+	organism	short_function
112F_arrow		motif_sequence	1255	4	+	organism	short_function
112F_arrow		motif_sequence	1435	4	+	organism	short_function
112F_arrow		motif_sequence	1943	4	-	organism	short_function
112F_arrow	GARE-motif	TCTGTTG	945	7	-	Brassica oleracea	gibberellin-responsive element
112F_arrow	A-box	CCGTCC	1125	6	+	Petroselinum crispum	cis-acting regulatory element
112F_arrow	Myb	CAACTG	234	6	-	Arabidopsis thaliana
112F_arrow	Myb	TAACTG	555	6	+	Arabidopsis thaliana
112F_arrow	TCA-element	TCAGAAGAGG	1134	9	+	Brassica oleracea	cis-acting element involved in salicylic acid responsiveness
112F_arrow	TCA-element	CCATCTTTTT	1208	9	+	Nicotiana tabacum	cis-acting element involved in salicylic acid responsiveness
112F_arrow	Gap-box	CAAATGAA(A/G)A	120	9	-	Arabidopsis thaliana	part of a light responsive element
112F_arrow	Gap-box	CAAATGAA(A/G)A	872	9.5	+	Arabidopsis thaliana	part of a light responsive element
112F_arrow	Gap-box	CAAATGAA(A/G)A	930	9	+	Arabidopsis thaliana	part of a light responsive element
112F_arrow	Unnamed__1	CGTGG	753	5	+	Zea mays
112F_arrow	CAAT-box	CCAAT	77	5	-	Arabidopsis thaliana	common cis-acting element in promoter and enhancer regions
112F_arrow	CAAT-box	CAAAT	125	5	-	Pisum sativum	common cis-acting element in promoter and enhancer regions
112F_arrow	CAAT-box	CAAT	154	4	-	Nicotiana glutinosa
112F_arrow	CAAT-box	CAAT	403	4	-	Nicotiana glutinosa
112F_arrow	CAAT-box	CAAT	422	4	-	Nicotiana glutinosa
112F_arrow	CAAT-box	CAAAT	450	5	+	Pisum sativum	common cis-acting element in promoter and enhancer regions
112F_arrow	CAAT-box	CAAT	471	4	-	Nicotiana glutinosa
112F_arrow	CAAT-box	CAAAT	495	5	-	Pisum sativum	common cis-acting element in promoter and enhancer regions
112F_arrow	CAAT-box	CAAT	698	4	+	Nicotiana glutinosa
112F_arrow	CAAT-box	CAAT	719	4	-	Nicotiana glutinosa
112F_arrow	CAAT-box	CAAT	744	4	+	Nicotiana glutinosa
112F_arrow	CAAT-box	CAAT	818	4	-	Nicotiana glutinosa
112F_arrow	CAAT-box	CAAT	842	4	-	Nicotiana glutinosa
112F_arrow	CAAT-box	CAAAT	872	5	+	Pisum sativum	common cis-acting element in promoter and enhancer regions
112F_arrow	CAAT-box	CAAAT	930	5	+	Pisum sativum	common cis-acting element in promoter and enhancer regions
112F_arrow	CAAT-box	CAAAT	1021	5	+	Pisum sativum	common cis-acting element in promoter and enhancer regions
112F_arrow	CAAT-box	CCAAT	1160	5	+	Arabidopsis thaliana	common cis-acting element in promoter and enhancer regions
112F_arrow	CAAT-box	CAAT	1161	4	+	Nicotiana glutinosa
112F_arrow	CAAT-box	CAAT	1260	4	+	Nicotiana glutinosa
112F_arrow	CAAT-box	CAAAT	1262	5	-	Pisum sativum	common cis-acting element in promoter and enhancer regions
112F_arrow	CAAT-box	CAAAT	1308	5	-	Pisum sativum	common cis-acting element in promoter and enhancer regions
112F_arrow	CAAT-box	CCAAT	1347	5	-	Arabidopsis thaliana	common cis-acting element in promoter and enhancer regions
112F_arrow	CAAT-box	CAAT	1387	4	+	Nicotiana glutinosa
112F_arrow	CAAT-box	CAAT	1408	4	+	Nicotiana glutinosa
112F_arrow	CAAT-box	CAAAT	1509	5	-	Pisum sativum	common cis-acting element in promoter and enhancer regions
112F_arrow	CAAT-box	CAAAT	1531	5	+	Pisum sativum	common cis-acting element in promoter and enhancer regions
112F_arrow	CAAT-box	CAAAT	1544	5	-	Pisum sativum	common cis-acting element in promoter and enhancer regions
112F_arrow	CAAT-box	CAAAT	1568	5	-	Pisum sativum	common cis-acting element in promoter and enhancer regions
112F_arrow	CAAT-box	CCAAT	1619	5	-	Arabidopsis thaliana	common cis-acting element in promoter and enhancer regions
112F_arrow	CAAT-box	CAAAT	1665	5	-	Pisum sativum	common cis-acting element in promoter and enhancer regions
112F_arrow	CAAT-box	CAAT	1711	4	+	Nicotiana glutinosa
112F_arrow	CAAT-box	CAAAT	1732	5	+	Pisum sativum	common cis-acting element in promoter and enhancer regions
112F_arrow	CAAT-box	CAAT	1772	4	+	Nicotiana glutinosa
112F_arrow	CAAT-box	CAAT	1785	4	-	Nicotiana glutinosa
112F_arrow	CAAT-box	CAAT	1800	4	+	Nicotiana glutinosa
112F_arrow	CAAT-box	CAAAT	1825	5	+	Pisum sativum	common cis-acting element in promoter and enhancer regions
112F_arrow	CAAT-box	CAAT	1955	4	+	Nicotiana glutinosa
112F_arrow	CAAT-box	CAAAT	1971	5	+	Pisum sativum	common cis-acting element in promoter and enhancer regions
156F_arrow	LTR	CCGAAA	93	6	-	Hordeum vulgare	cis-acting element involved in low-temperature responsiveness
156F_arrow	LTR	CCGAAA	565	6	-	Hordeum vulgare	cis-acting element involved in low-temperature responsiveness
156F_arrow	LTR	CCGAAA	691	6	-	Hordeum vulgare	cis-acting element involved in low-temperature responsiveness
156F_arrow	LTR	CCGAAA	1017	6	-	Hordeum vulgare	cis-acting element involved in low-temperature responsiveness
156F_arrow	AE-box	AGAAACTT	480	8	+	Arabidopsis thaliana	part of a module for light response
156F_arrow	AE-box	AGAAACTT	1094	8	-	Arabidopsis thaliana	part of a module for light response
156F_arrow	Myb-binding site	CAACAG	1691	6	+	Nicotiana tabacum
156F_arrow	ARE	AAACCA	617	6	+	Zea mays	cis-acting regulatory element essential for the anaerobic induction
156F_arrow	ARE	AAACCA	622	6	+	Zea mays	cis-acting regulatory element essential for the anaerobic induction
156F_arrow	ARE	AAACCA	881	6	+	Zea mays	cis-acting regulatory element essential for the anaerobic induction
156F_arrow	ARE	AAACCA	1822	6	+	Zea mays	cis-acting regulatory element essential for the anaerobic induction
156F_arrow	WUN-motif	CCATTTCAA	733	9	+	Nicotiana glutinosa
156F_arrow	P-box	CCTTTTG	1899	7	+	Oryza sativa	gibberellin-responsive element
156F_arrow	circadian	CAAAGATATC	1378	9	-	Lycopersicon esculentum	cis-acting regulatory element involved in circadian control
156F_arrow	ERE	ATTTCATA	41	8	+	Nicotiana glutinos
156F_arrow	ERE	ATTTCATA	104	8	+	Nicotiana glutinos
156F_arrow	chs-CMA1a	TTACTTAA	1780	8	-	Daucus carota	part of a light responsive element
156F_arrow	TCT-motif	TCTTAC	474	6	-	Arabidopsis thaliana	part of a light responsive element
156F_arrow	TCT-motif	TCTTAC	707	6	+	Arabidopsis thaliana	part of a light responsive element
156F_arrow	TCT-motif	TCTTAC	1081	6	-	Arabidopsis thaliana	part of a light responsive element
156F_arrow	TCT-motif	TCTTAC	1949	6	+	Arabidopsis thaliana	part of a light responsive element
156F_arrow	HD-Zip 3	GTAAT(G/C)ATTAC	46	9.5	+	Arabidopsis thaliana	protein binding site
156F_arrow	MYB	CAACAG	1691	6	+	Arabidopsis thaliana
156F_arrow	TCCC-motif	TCTCCCT	122	7	+	Spinacia oleracea	part of a light responsive element
156F_arrow	Box 4	ATTAAT	1075	6	-	Petroselinum crispum	part of a conserved DNA module involved in light responsiveness
156F_arrow	TCA	TCATCTTCAT	761	9	-	Pisum sativum
156F_arrow		motif_sequence	5	4	-	organism	short_function
156F_arrow		motif_sequence	121	4	+	organism	short_function
156F_arrow		motif_sequence	127	4	+	organism	short_function
156F_arrow		motif_sequence	179	4	-	organism	short_function
156F_arrow		motif_sequence	192	4	+	organism	short_function
156F_arrow		motif_sequence	290	4	-	organism	short_function
156F_arrow		motif_sequence	315	4	+	organism	short_function
156F_arrow		motif_sequence	320	4	+	organism	short_function
156F_arrow		motif_sequence	757	4	-	organism	short_function
156F_arrow		motif_sequence	766	4	-	organism	short_function
156F_arrow		motif_sequence	1338	4	-	organism	short_function
156F_arrow		motif_sequence	1706	4	+	organism	short_function
156F_arrow		motif_sequence	1768	4	+	organism	short_function
156F_arrow		motif_sequence	1803	4	-	organism	short_function
156F_arrow	DRE core	GCCGAC	113	6	-	Arabidopsis thaliana
156F_arrow	CAAT-box	CAAT	19	4	-	Nicotiana glutinosa
156F_arrow	CAAT-box	CAAAT	141	5	+	Pisum sativum	common cis-acting element in promoter and enhancer regions
156F_arrow	CAAT-box	CAAT	227	4	-	Nicotiana glutinosa
156F_arrow	CAAT-box	CAAT	294	4	-	Nicotiana glutinosa
156F_arrow	CAAT-box	CAAT	460	4	+	Nicotiana glutinosa
156F_arrow	CAAT-box	CAAT	471	4	-	Nicotiana glutinosa
156F_arrow	CAAT-box	CAAT	494	4	+	Nicotiana glutinosa
156F_arrow	CAAT-box	CAAT	557	4	+	Nicotiana glutinosa
156F_arrow	CAAT-box	CAAT	641	4	-	Nicotiana glutinosa
156F_arrow	CAAT-box	CAAAT	720	5	+	Pisum sativum	common cis-acting element in promoter and enhancer regions
156F_arrow	CAAT-box	CAAAT	739	5	+	Pisum sativum	common cis-acting element in promoter and enhancer regions
156F_arrow	CAAT-box	CAAT	855	4	+	Nicotiana glutinosa
156F_arrow	CAAT-box	CAAT	1178	4	+	Nicotiana glutinosa
156F_arrow	CAAT-box	CAAT	1212	4	-	Nicotiana glutinosa
156F_arrow	CAAT-box	CAAT	1235	4	+	Nicotiana glutinosa
156F_arrow	CAAT-box	CAAAT	1272	5	+	Pisum sativum	common cis-acting element in promoter and enhancer regions
156F_arrow	CAAT-box	CAAT	1374	4	+	Nicotiana glutinosa
156F_arrow	CAAT-box	TGCCAAC	1430	7	+	Petunia hybrida	common cis-acting element in promoter and enhancer regions
156F_arrow	CAAT-box	CAAT	1436	4	+	Nicotiana glutinosa
156F_arrow	CAAT-box	CAAT	1515	4	+	Nicotiana glutinosa
156F_arrow	CAAT-box	CAAT	1539	4	+	Nicotiana glutinosa
156F_arrow	CAAT-box	CAAT	1552	4	+	Nicotiana glutinosa
156F_arrow	CAAT-box	CAAT	1584	4	+	Nicotiana glutinosa
156F_arrow	CAAT-box	CAAT	1679	4	-	Nicotiana glutinosa
156F_arrow	CAAT-box	CAAAT	1773	5	+	Pisum sativum	common cis-acting element in promoter and enhancer regions
156F_arrow	CAAT-box	CAAT	1867	4	+	Nicotiana glutinosa
156F_arrow	CAAT-box	CAAT	1942	4	+	Nicotiana glutinosa
156F_arrow	CAAT-box	CAAT	1946	4	+	Nicotiana glutinosa
156F_arrow	TCA-element	CCATCTTTTT	1278	9	-	Nicotiana tabacum	cis-acting element involved in salicylic acid responsiveness
156F_arrow	GT1-motif	GGTTAA	1061	6	+	Arabidopsis thaliana	light responsive element
156F_arrow	GT1-motif	GGTTAAT	1635	7	+	Avena sativa	light responsive element
156F_arrow	LAMP-element	CTTTATCA	1491	8	-	Pisum sativum	part of a light responsive element
156F_arrow	O2-site	GATGACATGG	1620	9	-	Zea mays	cis-acting regulatory element involved in zein metabolism regulation
156F_arrow	AAGAA-motif	GAAAGAA	1043	7	+	Avena sativa
156F_arrow	AAGAA-motif	GAAAGAA	1187	7	+	Avena sativa
156F_arrow	AAGAA-motif	GAAAGAA	1191	7	+	Avena sativa
156F_arrow	Unnamed__4	CTCC	5	4	-	Petroselinum hortense
156F_arrow	Unnamed__4	CTCC	123	4	+	Petroselinum hortense
156F_arrow	Unnamed__4	CTCC	129	4	+	Petroselinum hortense
156F_arrow	Unnamed__4	CTCC	279	4	-	Petroselinum hortense
156F_arrow	Unnamed__4	CTCC	284	4	-	Petroselinum hortense
156F_arrow	Unnamed__4	CTCC	498	4	-	Petroselinum hortense
156F_arrow	Unnamed__4	CTCC	1455	4	+	Petroselinum hortense
156F_arrow	Unnamed__4	CTCC	1462	4	+	Petroselinum hortense
156F_arrow	Unnamed__4	CTCC	1646	4	+	Petroselinum hortense
156F_arrow	Unnamed__4	CTCC	1842	4	+	Petroselinum hortense
156F_arrow	Unnamed__4	CTCC	1917	4	-	Petroselinum hortense
156F_arrow	Unnamed__4	CTCC	1998	4	+	Petroselinum hortense
156F_arrow	TATC-box	TATCCCA	1741	7	-	Oryza sativa	cis-acting element involved in gibberellin-responsiveness
156F_arrow	MYC	CATTTG	720	6	-	Arabidopsis thaliana
156F_arrow	MYC	CATTTG	739	6	-	Arabidopsis thaliana
156F_arrow	TC-rich repeats	GTTTTCTTAC	703	9	+	Nicotiana tabacum	cis-acting element involved in defense and stress responsiveness
156F_arrow	TATA-box	TATAAAA	530	7	-	Pisum sativum	core promoter element around -30 of transcription start
156F_arrow	TATA-box	TATAAA	531	6	-	Helianthus annuus	core promoter element around -30 of transcription start
156F_arrow	TATA-box	TATAA	532	5	-	Arabidopsis thaliana	core promoter element around -30 of transcription start
156F_arrow	TATA-box	TATA	533	4	+	Arabidopsis thaliana	core promoter element around -30 of transcription start
156F_arrow	TATA-box	ATTATA	677	6	+	Brassica napus	core promoter element around -30 of transcription start
156F_arrow	TATA-box	TATAA	678	5	-	Arabidopsis thaliana	core promoter element around -30 of transcription start
156F_arrow	TATA-box	TATA	679	4	+	Arabidopsis thaliana	core promoter element around -30 of transcription start
156F_arrow	TATA-box	TATACA	849	6	-	Helianthus annuus	core promoter element around -30 of transcription start
156F_arrow	TATA-box	TATA	851	4	+	Arabidopsis thaliana	core promoter element around -30 of transcription start
156F_arrow	TATA-box	TATA	1068	4	-	Arabidopsis thaliana	core promoter element around -30 of transcription start
156F_arrow	TATA-box	TATAA	1137	5	-	Arabidopsis thaliana	core promoter element around -30 of transcription start
156F_arrow	TATA-box	TATA	1138	4	-	Arabidopsis thaliana	core promoter element around -30 of transcription start
156F_arrow	TATA-box	ATTATA	1246	6	+	Brassica napus	core promoter element around -30 of transcription start
156F_arrow	TATA-box	TATAA	1247	5	-	Arabidopsis thaliana	core promoter element around -30 of transcription start
156F_arrow	TATA-box	TATA	1248	4	-	Arabidopsis thaliana	core promoter element around -30 of transcription start
156F_arrow	TATA-box	ATTATA	1275	6	+	Brassica napus	core promoter element around -30 of transcription start
156F_arrow	TATA-box	TATAA	1276	5	-	Arabidopsis thaliana	core promoter element around -30 of transcription start
156F_arrow	TATA-box	TATA	1277	4	-	Arabidopsis thaliana	core promoter element around -30 of transcription start
156F_arrow	TATA-box	ATTATA	1376	6	+	Brassica napus	core promoter element around -30 of transcription start
156F_arrow	TATA-box	TATAA	1377	5	-	Arabidopsis thaliana	core promoter element around -30 of transcription start
156F_arrow	TATA-box	TATA	1378	4	-	Arabidopsis thaliana	core promoter element around -30 of transcription start
156F_arrow	TATA-box	ATATAA	1471	6	+	Brassica oleracea	core promoter element around -30 of transcription start
156F_arrow	TATA-box	TATA	1472	4	-	Arabidopsis thaliana	core promoter element around -30 of transcription start
156F_arrow	TATA-box	ccTATAAAaa	1964	9	+	Arabidopsis thaliana	core promoter element around -30 of transcription start
156F_arrow	TATA-box	TATA	1966	4	-	Arabidopsis thaliana	core promoter element around -30 of transcription start
210F_arrow	AT~TATA-box	TATATA	8	6	+	Arabidopsis thaliana
210F_arrow	AT~TATA-box	TATATA	92	6	+	Arabidopsis thaliana
210F_arrow	AT~TATA-box	TATATA	110	6	+	Arabidopsis thaliana
210F_arrow	AT~TATA-box	TATATAAA	128	8	-	Arabidopsis thaliana
210F_arrow	AT~TATA-box	TATATA	130	6	+	Arabidopsis thaliana
210F_arrow	AT~TATA-box	TATATA	1766	6	-	Arabidopsis thaliana
210F_arrow	AT~TATA-box	TATATA	1768	6	-	Arabidopsis thaliana
210F_arrow	GATA-motif	AAGGATAAGG	138	9	-	Solanum tuberosum	part of a light responsive element
210F_arrow		motif_sequence	47	4	+	organism	short_function
210F_arrow		motif_sequence	239	4	+	organism	short_function
210F_arrow		motif_sequence	466	4	-	organism	short_function
210F_arrow		motif_sequence	573	4	+	organism	short_function
210F_arrow		motif_sequence	656	4	+	organism	short_function
210F_arrow		motif_sequence	677	4	-	organism	short_function
210F_arrow		motif_sequence	688	4	-	organism	short_function
210F_arrow		motif_sequence	789	4	-	organism	short_function
210F_arrow		motif_sequence	820	4	-	organism	short_function
210F_arrow		motif_sequence	845	4	-	organism	short_function
210F_arrow		motif_sequence	882	4	-	organism	short_function
210F_arrow		motif_sequence	913	4	+	organism	short_function
210F_arrow		motif_sequence	1046	4	+	organism	short_function
210F_arrow		motif_sequence	1092	4	+	organism	short_function
210F_arrow		motif_sequence	1261	4	+	organism	short_function
210F_arrow		motif_sequence	1356	4	-	organism	short_function
210F_arrow		motif_sequence	1385	4	-	organism	short_function
210F_arrow		motif_sequence	1456	4	+	organism	short_function
210F_arrow		motif_sequence	1585	4	-	organism	short_function
210F_arrow		motif_sequence	1702	4	-	organism	short_function
210F_arrow		motif_sequence	1835	4	-	organism	short_function
210F_arrow		motif_sequence	1934	4	-	organism	short_function
210F_arrow	WUN-motif	CCATTTCAA	638	9	+	Nicotiana glutinosa
210F_arrow	WUN-motif	AAATTACTA	1023	9	+	Nicotiana glutinosa
210F_arrow	Myb	TAACTG	560	6	-	Arabidopsis thaliana
210F_arrow	Myb	TAACTG	1742	6	-	Arabidopsis thaliana
210F_arrow	TCA-element	TCAGAAGAGG	682	9	+	Brassica oleracea	cis-acting element involved in salicylic acid responsiveness
210F_arrow	CAAT-box	CAAT	73	4	+	Nicotiana glutinosa
210F_arrow	CAAT-box	CAAT	173	4	+	Nicotiana glutinosa
210F_arrow	CAAT-box	CAAT	199	4	-	Nicotiana glutinosa
210F_arrow	CAAT-box	CAAT	237	4	+	Nicotiana glutinosa
210F_arrow	CAAT-box	CAAT	258	4	+	Nicotiana glutinosa
210F_arrow	CAAT-box	CAAT	314	4	+	Nicotiana glutinosa
210F_arrow	CAAT-box	TGCAAATCT	389	9	+	Brassica juncea	common cis-acting element in promoter and enhancer regions
210F_arrow	CAAT-box	CAAAT	391	5	+	Pisum sativum	common cis-acting element in promoter and enhancer regions
210F_arrow	CAAT-box	CAAAT	462	5	-	Pisum sativum	common cis-acting element in promoter and enhancer regions
210F_arrow	CAAT-box	CAAT	470	4	-	Nicotiana glutinosa
210F_arrow	CAAT-box	CCAAT	531	5	+	Arabidopsis thaliana	common cis-acting element in promoter and enhancer regions
210F_arrow	CAAT-box	CAAT	532	4	+	Nicotiana glutinosa
210F_arrow	CAAT-box	CAAT	606	4	+	Nicotiana glutinosa
210F_arrow	CAAT-box	CAAT	817	4	-	Nicotiana glutinosa
210F_arrow	CAAT-box	CAAT	842	4	-	Nicotiana glutinosa
210F_arrow	CAAT-box	CAAT	895	4	+	Nicotiana glutinosa
210F_arrow	CAAT-box	CAAAT	1037	5	-	Pisum sativum	common cis-acting element in promoter and enhancer regions
210F_arrow	CAAT-box	CAAT	1133	4	+	Nicotiana glutinosa
210F_arrow	CAAT-box	CAAT	1146	4	-	Nicotiana glutinosa
210F_arrow	CAAT-box	CCAAT	1193	5	-	Arabidopsis thaliana	common cis-acting element in promoter and enhancer regions
210F_arrow	CAAT-box	CAAT	1199	4	-	Nicotiana glutinosa
210F_arrow	CAAT-box	CAAT	1399	4	+	Nicotiana glutinosa
210F_arrow	CAAT-box	CCAAT	1463	5	-	Arabidopsis thaliana	common cis-acting element in promoter and enhancer regions
210F_arrow	CAAT-box	CAAT	1469	4	+	Nicotiana glutinosa
210F_arrow	CAAT-box	CAAAT	1514	5	-	Pisum sativum	common cis-acting element in promoter and enhancer regions
210F_arrow	CAAT-box	CCAAT	1545	5	-	Arabidopsis thaliana	common cis-acting element in promoter and enhancer regions
210F_arrow	CAAT-box	CAAAT	1578	5	-	Pisum sativum	common cis-acting element in promoter and enhancer regions
210F_arrow	CAAT-box	CAAT	1604	4	-	Nicotiana glutinosa
210F_arrow	CAAT-box	CAAAT	1622	5	+	Pisum sativum	common cis-acting element in promoter and enhancer regions
210F_arrow	CAAT-box	CAAT	1652	4	-	Nicotiana glutinosa
210F_arrow	CAAT-box	CCAAT	1759	5	+	Arabidopsis thaliana	common cis-acting element in promoter and enhancer regions
210F_arrow	CAAT-box	CAAT	1760	4	+	Nicotiana glutinosa
210F_arrow	CAAT-box	CCAAT	1839	5	-	Arabidopsis thaliana	common cis-acting element in promoter and enhancer regions
210F_arrow	CAAT-box	CAAAT	1938	5	-	Pisum sativum	common cis-acting element in promoter and enhancer regions
210F_arrow	CAAT-box	CAAT	1956	4	-	Nicotiana glutinosa
210F_arrow	CAAT-box	CAAT	1974	4	-	Nicotiana glutinosa
210F_arrow	Unnamed__1	CGTGG	244	5	+	Zea mays
210F_arrow	Myb-binding site	CAACAG	585	6	+	Nicotiana tabacum
210F_arrow	Myb-binding site	CAACAG	1639	6	+	Nicotiana tabacum
210F_arrow	W box	TTGACC	33	6	+	Arabidopsis thaliana
210F_arrow	AAGAA-motif	GAAAGAA	673	7	+	Avena sativa
210F_arrow	AAGAA-motif	GAAAGAA	806	7	+	Avena sativa
210F_arrow	AAGAA-motif	GAAAGAA	831	7	+	Avena sativa
210F_arrow	AAGAA-motif	GAAAGAA	1242	7	+	Avena sativa
210F_arrow	AAGAA-motif	GAAAGAA	1381	7	+	Avena sativa
210F_arrow	TCT-motif	TCTTAC	1977	6	-	Arabidopsis thaliana	part of a light responsive element
210F_arrow	Unnamed__4	CTCC	271	4	+	Petroselinum hortense
210F_arrow	Unnamed__4	CTCC	854	4	-	Petroselinum hortense
210F_arrow	Unnamed__4	CTCC	1142	4	+	Petroselinum hortense
210F_arrow	Unnamed__4	CTCC	1258	4	+	Petroselinum hortense
210F_arrow	Unnamed__4	CTCC	1428	4	-	Petroselinum hortense
210F_arrow	Unnamed__4	CTCC	1445	4	-	Petroselinum hortense
210F_arrow	Unnamed__4	CTCC	1582	4	-	Petroselinum hortense
210F_arrow	Unnamed__4	CTCC	1629	4	-	Petroselinum hortense
210F_arrow	Unnamed__4	CTCC	1821	4	-	Petroselinum hortense
210F_arrow	GT1-motif	GGTTAA	1316	6	+	Arabidopsis thaliana	light responsive element
210F_arrow	ERE	ATTTCATA	104	8	+	Nicotiana glutinos
210F_arrow	ERE	ATTTTAAA	1062	8	-	Nicotiana glutinos
210F_arrow	CAG-motif	GAAAGGCAGAC	248	10	-	Arabidopsis thaliana	part of a light response element
210F_arrow	O2-site	GATGACATGG	1854	9	+	Zea mays	cis-acting regulatory element involved in zein metabolism regulation
210F_arrow	Myc	TCTCTTA	1978	7	-	Arabidopsis thaliana
210F_arrow	Box 4	ATTAAT	13	6	+	Petroselinum crispum	part of a conserved DNA module involved in light responsiveness
210F_arrow	Box 4	ATTAAT	1503	6	-	Petroselinum crispum	part of a conserved DNA module involved in light responsiveness
210F_arrow	TC-rich repeats	GTTTTCTTAC	1242	9	-	Nicotiana tabacum	cis-acting element involved in defense and stress responsiveness
210F_arrow	TATA-box	ATTATA	6	6	+	Brassica napus	core promoter element around -30 of transcription start
210F_arrow	TATA-box	TATATAA	7	7	-	Arabidopsis thaliana	core promoter element around -30 of transcription start
210F_arrow	TATA-box	TATATA	8	6	+	Arabidopsis thaliana	core promoter element around -30 of transcription start
210F_arrow	TATA-box	ATATAT	9	6	+	Brassica napus	core promoter element around -30 of transcription start
210F_arrow	TATA-box	TATA	10	4	+	Arabidopsis thaliana	core promoter element around -30 of transcription start
210F_arrow	TATA-box	taTATAAAtc	42	9	-	Arabidopsis thaliana	core promoter element around -30 of transcription start
210F_arrow	TATA-box	TATA	76	4	+	Arabidopsis thaliana	core promoter element around -30 of transcription start
210F_arrow	TATA-box	TATA	82	4	+	Arabidopsis thaliana	core promoter element around -30 of transcription start
210F_arrow	TATA-box	TACAAAA	84	7	+	Oryza sativa	core promoter element around -30 of transcription start
210F_arrow	TATA-box	ATATAT	91	6	+	Brassica napus	core promoter element around -30 of transcription start
210F_arrow	TATA-box	TATATA	92	6	+	Arabidopsis thaliana	core promoter element around -30 of transcription start
210F_arrow	TATA-box	ATATAT	93	6	+	Brassica napus	core promoter element around -30 of transcription start
210F_arrow	TATA-box	TATA	94	4	+	Arabidopsis thaliana	core promoter element around -30 of transcription start
210F_arrow	TATA-box	ATATAT	109	6	+	Brassica napus	core promoter element around -30 of transcription start
210F_arrow	TATA-box	TATATA	110	6	+	Arabidopsis thaliana	core promoter element around -30 of transcription start
210F_arrow	TATA-box	TATA	112	4	+	Arabidopsis thaliana	core promoter element around -30 of transcription start
210F_arrow	TATA-box	taTATAAAg	127	9	-	Lycopersicon esculentum	core promoter element around -30 of transcription start
210F_arrow	TATA-box	TATAAA	128	6	-	Helianthus annuus	core promoter element around -30 of transcription start
210F_arrow	TATA-box	TATATAA	129	7	-	Arabidopsis thaliana	core promoter element around -30 of transcription start
210F_arrow	TATA-box	TATATA	130	6	+	Arabidopsis thaliana	core promoter element around -30 of transcription start
210F_arrow	TATA-box	ATATAT	131	6	+	Brassica napus	core promoter element around -30 of transcription start
210F_arrow	TATA-box	TATA	132	4	+	Arabidopsis thaliana	core promoter element around -30 of transcription start
210F_arrow	TATA-box	TACAAAA	216	7	-	Oryza sativa	core promoter element around -30 of transcription start
210F_arrow	TATA-box	TACAAAA	288	7	-	Oryza sativa	core promoter element around -30 of transcription start
210F_arrow	TATA-box	ATTATA	453	6	+	Brassica napus	core promoter element around -30 of transcription start
210F_arrow	TATA-box	TATAA	454	5	-	Arabidopsis thaliana	core promoter element around -30 of transcription start
210F_arrow	TATA-box	TATA	455	4	+	Arabidopsis thaliana	core promoter element around -30 of transcription start
210F_arrow	TATA-box	TATACA	480	6	-	Helianthus annuus	core promoter element around -30 of transcription start
210F_arrow	TATA-box	TATA	482	4	+	Arabidopsis thaliana	core promoter element around -30 of transcription start
210F_arrow	TATA-box	ATATAA	499	6	+	Brassica oleracea	core promoter element around -30 of transcription start
210F_arrow	TATA-box	TATA	500	4	+	Arabidopsis thaliana	core promoter element around -30 of transcription start
210F_arrow	TATA-box	ATATAA	524	6	+	Brassica oleracea	core promoter element around -30 of transcription start
210F_arrow	TATA-box	TATA	525	4	+	Arabidopsis thaliana	core promoter element around -30 of transcription start
210F_arrow	TATA-box	tcTATAAATAgg	663	11	+	Nicotiana tabacum	core promoter element around -30 of transcription start
210F_arrow	TATA-box	TATA	665	4	+	Arabidopsis thaliana	core promoter element around -30 of transcription start
210F_arrow	TATA-box	ATTATA	944	6	+	Brassica napus	core promoter element around -30 of transcription start
210F_arrow	TATA-box	TATAA	945	5	-	Arabidopsis thaliana	core promoter element around -30 of transcription start
210F_arrow	TATA-box	TATA	946	4	+	Arabidopsis thaliana	core promoter element around -30 of transcription start
210F_arrow	TATA-box	TATAA	1237	5	-	Arabidopsis thaliana	core promoter element around -30 of transcription start
210F_arrow	TATA-box	TATA	1238	4	-	Arabidopsis thaliana	core promoter element around -30 of transcription start
210F_arrow	TATA-box	TATAAGAA	1332	8	-	Zea mays	core promoter element around -30 of transcription start
210F_arrow	TATA-box	TATAA	1335	5	-	Arabidopsis thaliana	core promoter element around -30 of transcription start
210F_arrow	TATA-box	TATA	1336	4	-	Arabidopsis thaliana	core promoter element around -30 of transcription start
210F_arrow	TATA-box	TATA	1414	4	-	Arabidopsis thaliana	core promoter element around -30 of transcription start
210F_arrow	TATA-box	TATA	1572	4	-	Arabidopsis thaliana	core promoter element around -30 of transcription start
210F_arrow	TATA-box	TATATAA	1765	7	-	Arabidopsis thaliana	core promoter element around -30 of transcription start
210F_arrow	TATA-box	TATATA	1766	6	-	Arabidopsis thaliana	core promoter element around -30 of transcription start
210F_arrow	TATA-box	ATATAT	1767	6	-	Brassica napus	core promoter element around -30 of transcription start
210F_arrow	TATA-box	TATATA	1768	6	-	Arabidopsis thaliana	core promoter element around -30 of transcription start
210F_arrow	TATA-box	TATA	1770	4	-	Arabidopsis thaliana	core promoter element around -30 of transcription start
210F_arrow	TCA	TCATCTTCAT	1259	9	+	Pisum sativum
210F_arrow	TCA	TCATCTTCAT	1894	9	+	Pisum sativum
210F_arrow	MYB	CAACAG	585	6	+	Arabidopsis thaliana
210F_arrow	MYB	CAACAG	1639	6	+	Arabidopsis thaliana
222F_arrow	TATA-box	ATATAA	516	6	+	Brassica oleracea	core promoter element around -30 of transcription start
222F_arrow	TATA-box	TATA	517	4	+	Arabidopsis thaliana	core promoter element around -30 of transcription start
222F_arrow	TATA-box	ATTATA	603	6	+	Brassica napus	core promoter element around -30 of transcription start
222F_arrow	TATA-box	TATAA	604	5	-	Arabidopsis thaliana	core promoter element around -30 of transcription start
222F_arrow	TATA-box	TATA	605	4	+	Arabidopsis thaliana	core promoter element around -30 of transcription start
222F_arrow	TATA-box	TATA	774	4	+	Arabidopsis thaliana	core promoter element around -30 of transcription start
222F_arrow	TATA-box	TATAA	861	5	-	Arabidopsis thaliana	core promoter element around -30 of transcription start
222F_arrow	TATA-box	TATA	862	4	+	Arabidopsis thaliana	core promoter element around -30 of transcription start
222F_arrow	TATA-box	TATAAA	877	6	-	Helianthus annuus	core promoter element around -30 of transcription start
222F_arrow	TATA-box	TATAA	878	5	-	Arabidopsis thaliana	core promoter element around -30 of transcription start
222F_arrow	TATA-box	TATA	879	4	+	Arabidopsis thaliana	core promoter element around -30 of transcription start
222F_arrow	TATA-box	ATTATA	933	6	+	Brassica napus	core promoter element around -30 of transcription start
222F_arrow	TATA-box	TATAA	934	5	-	Arabidopsis thaliana	core promoter element around -30 of transcription start
222F_arrow	TATA-box	TATA	935	4	+	Arabidopsis thaliana	core promoter element around -30 of transcription start
222F_arrow	TATA-box	ATTATA	972	6	+	Brassica napus	core promoter element around -30 of transcription start
222F_arrow	TATA-box	TATAA	973	5	-	Arabidopsis thaliana	core promoter element around -30 of transcription start
222F_arrow	TATA-box	TATA	974	4	+	Arabidopsis thaliana	core promoter element around -30 of transcription start
222F_arrow	TATA-box	TATAA	984	5	-	Arabidopsis thaliana	core promoter element around -30 of transcription start
222F_arrow	TATA-box	TATA	985	4	+	Arabidopsis thaliana	core promoter element around -30 of transcription start
222F_arrow	TATA-box	TATTTAAA	992	8	-	Arabidopsis thaliana	core promoter element around -30 of transcription start
222F_arrow	TATA-box	ATATAA	1018	6	+	Brassica oleracea	core promoter element around -30 of transcription start
222F_arrow	TATA-box	TATA	1019	4	-	Arabidopsis thaliana	core promoter element around -30 of transcription start
222F_arrow	TATA-box	TATA	1220	4	-	Arabidopsis thaliana	core promoter element around -30 of transcription start
222F_arrow	TATA-box	ATTATA	1266	6	+	Brassica napus	core promoter element around -30 of transcription start
222F_arrow	TATA-box	TATAA	1267	5	-	Arabidopsis thaliana	core promoter element around -30 of transcription start
222F_arrow	TATA-box	TATA	1268	4	-	Arabidopsis thaliana	core promoter element around -30 of transcription start
222F_arrow	TATA-box	TATA	1301	4	-	Arabidopsis thaliana	core promoter element around -30 of transcription start
222F_arrow	TATA-box	TATA	1314	4	-	Arabidopsis thaliana	core promoter element around -30 of transcription start
222F_arrow	TATA-box	TATA	1405	4	-	Arabidopsis thaliana	core promoter element around -30 of transcription start
222F_arrow	TATA-box	ATATAA	1447	6	+	Brassica oleracea	core promoter element around -30 of transcription start
222F_arrow	TATA-box	TATA	1448	4	-	Arabidopsis thaliana	core promoter element around -30 of transcription start
222F_arrow	TATA-box	ATATAT	1467	6	-	Brassica napus	core promoter element around -30 of transcription start
222F_arrow	TATA-box	TATATA	1468	6	-	Arabidopsis thaliana	core promoter element around -30 of transcription start
222F_arrow	TATA-box	ATATAT	1469	6	-	Brassica napus	core promoter element around -30 of transcription start
222F_arrow	TATA-box	TATATA	1470	6	-	Arabidopsis thaliana	core promoter element around -30 of transcription start
222F_arrow	TATA-box	ATATAT	1471	6	-	Brassica napus	core promoter element around -30 of transcription start
222F_arrow	TATA-box	TATATA	1472	6	-	Arabidopsis thaliana	core promoter element around -30 of transcription start
222F_arrow	TATA-box	ATATAT	1473	6	-	Brassica napus	core promoter element around -30 of transcription start
222F_arrow	TATA-box	TATATA	1474	6	-	Arabidopsis thaliana	core promoter element around -30 of transcription start
222F_arrow	TATA-box	ATATAA	1475	6	+	Brassica oleracea	core promoter element around -30 of transcription start
222F_arrow	TATA-box	TATA	1476	4	-	Arabidopsis thaliana	core promoter element around -30 of transcription start
222F_arrow	TATA-box	ATATAT	1485	6	-	Brassica napus	core promoter element around -30 of transcription start
222F_arrow	TATA-box	TATA	1486	4	-	Arabidopsis thaliana	core promoter element around -30 of transcription start
222F_arrow	TATA-box	TATA	1539	4	-	Arabidopsis thaliana	core promoter element around -30 of transcription start
222F_arrow	TATA-box	TATATAA	1552	7	-	Arabidopsis thaliana	core promoter element around -30 of transcription start
222F_arrow	TATA-box	TATATA	1553	6	-	Arabidopsis thaliana	core promoter element around -30 of transcription start
222F_arrow	TATA-box	TATA	1555	4	-	Arabidopsis thaliana	core promoter element around -30 of transcription start
222F_arrow	TATA-box	ATTATA	1656	6	+	Brassica napus	core promoter element around -30 of transcription start
222F_arrow	TATA-box	TATAA	1657	5	-	Arabidopsis thaliana	core promoter element around -30 of transcription start
222F_arrow	TATA-box	TATA	1658	4	-	Arabidopsis thaliana	core promoter element around -30 of transcription start
222F_arrow	TATA-box	TATA	1720	4	-	Arabidopsis thaliana	core promoter element around -30 of transcription start
222F_arrow	TATA-box	TATA	1874	4	-	Arabidopsis thaliana	core promoter element around -30 of transcription start
222F_arrow	TC-rich repeats	ATTCTCTAAC	320	9	-	Nicotiana tabacum	cis-acting element involved in defense and stress responsiveness
222F_arrow	ABRE4	CACGTA	1030	6	-	Zea mays
222F_arrow	MYC	CATTTG	166	6	-	Arabidopsis thaliana
222F_arrow	MYC	CAATTG	397	6	+	Arabidopsis thaliana
222F_arrow	MYC	CATTTG	1781	6	+	Arabidopsis thaliana
222F_arrow	CTAG-motif	ACTAGCAGAA	412	9	+	Avena sativa
222F_arrow	CTAG-motif	ACTAGCAGAA	1956	9	+	Avena sativa
222F_arrow	as-1	TGACG	253	5	-	Arabidopsis thaliana
222F_arrow	Unnamed__4	CTCC	30	4	+	Petroselinum hortense
222F_arrow	Unnamed__4	CTCC	115	4	-	Petroselinum hortense
222F_arrow	Unnamed__4	CTCC	171	4	-	Petroselinum hortense
222F_arrow	Unnamed__4	CTCC	231	4	+	Petroselinum hortense
222F_arrow	Unnamed__4	CTCC	279	4	+	Petroselinum hortense
222F_arrow	Unnamed__4	CTCC	416	4	-	Petroselinum hortense
222F_arrow	Unnamed__4	CTCC	661	4	+	Petroselinum hortense
222F_arrow	Unnamed__4	CTCC	843	4	+	Petroselinum hortense
222F_arrow	Unnamed__4	CTCC	1152	4	+	Petroselinum hortense
222F_arrow	Unnamed__4	CTCC	1454	4	-	Petroselinum hortense
222F_arrow	Unnamed__4	CTCC	1878	4	-	Petroselinum hortense
222F_arrow	Unnamed__4	CTCC	1925	4	+	Petroselinum hortense
222F_arrow	CAT-box	GCCACT	247	6	+	Arabidopsis thaliana	cis-acting regulatory element related to meristem expression
222F_arrow	AAGAA-motif	GAAAGAA	284	7	-	Avena sativa
222F_arrow	AAGAA-motif	GAAAGAA	566	7	+	Avena sativa
222F_arrow	AAGAA-motif	GAAAGAA	1287	7	-	Avena sativa
222F_arrow	AAGAA-motif	GAAAGAA	1386	7	-	Avena sativa
222F_arrow	AAGAA-motif	gGTAAAGAAA	1410	9	+	Avena sativa
222F_arrow	O2-site	GATGACATGG	7	9	+	Zea mays	cis-acting regulatory element involved in zein metabolism regulation
222F_arrow	O2-site	GATGACATGG	15	9	+	Zea mays	cis-acting regulatory element involved in zein metabolism regulation
222F_arrow	CGTCA-motif	CGTCA	253	5	+	Hordeum vulgare	cis-acting regulatory element involved in the MeJA-responsiveness
222F_arrow	G-box	CACGTG	866	6	+	Arabidopsis thaliana	cis-acting regulatory element involved in light responsiveness
222F_arrow	G-box	TAAACGTG	1021	8	+	Brassica oleracea	cis-acting regulatory element involved in light responsiveness
222F_arrow	G-box	TACGTG	1030	6	+	Arabidopsis thaliana	cis-acting regulatory element involved in light responsiveness
222F_arrow	GT1-motif	GGTTAA	748	6	-	Arabidopsis thaliana	light responsive element
222F_arrow	AT1-motif	AATTATTTTTTATT	941	13	-	Solanum tuberosum	part of a light responsive module
222F_arrow	Myb	TAACTG	823	6	-	Arabidopsis thaliana
222F_arrow	Myb	TAACTG	1071	6	+	Arabidopsis thaliana
222F_arrow	Unnamed__1	CGTGG	1621	5	+	Zea mays
222F_arrow	CAAT-box	CAAAT	38	5	-	Pisum sativum	common cis-acting element in promoter and enhancer regions
222F_arrow	CAAT-box	CAAT	81	4	-	Nicotiana glutinosa
222F_arrow	CAAT-box	CAAT	130	4	-	Nicotiana glutinosa
222F_arrow	CAAT-box	CAAAT	166	5	+	Pisum sativum	common cis-acting element in promoter and enhancer regions
222F_arrow	CAAT-box	CAAT	299	4	-	Nicotiana glutinosa
222F_arrow	CAAT-box	CAAT	350	4	-	Nicotiana glutinosa
222F_arrow	CAAT-box	CAAT	397	4	+	Nicotiana glutinosa
222F_arrow	CAAT-box	CCAAT	399	5	-	Arabidopsis thaliana	common cis-acting element in promoter and enhancer regions
222F_arrow	CAAT-box	CAAT	429	4	-	Nicotiana glutinosa
222F_arrow	CAAT-box	CAAT	511	4	+	Nicotiana glutinosa
222F_arrow	CAAT-box	CAAT	620	4	+	Nicotiana glutinosa
222F_arrow	CAAT-box	CAAAT	622	5	-	Pisum sativum	common cis-acting element in promoter and enhancer regions
222F_arrow	CAAT-box	CAAAT	649	5	+	Pisum sativum	common cis-acting element in promoter and enhancer regions
222F_arrow	CAAT-box	CAAAT	786	5	+	Pisum sativum	common cis-acting element in promoter and enhancer regions
222F_arrow	CAAT-box	CAAT	797	4	-	Nicotiana glutinosa
222F_arrow	CAAT-box	CAAT	829	4	-	Nicotiana glutinosa
222F_arrow	CAAT-box	CAAT	838	4	-	Nicotiana glutinosa
222F_arrow	CAAT-box	CCAAT	882	5	-	Arabidopsis thaliana	common cis-acting element in promoter and enhancer regions
222F_arrow	CAAT-box	CAAT	907	4	+	Nicotiana glutinosa
222F_arrow	CAAT-box	CAAT	1067	4	+	Nicotiana glutinosa
222F_arrow	CAAT-box	CAAAT	1119	5	-	Pisum sativum	common cis-acting element in promoter and enhancer regions
222F_arrow	CAAT-box	CAAAT	1401	5	+	Pisum sativum	common cis-acting element in promoter and enhancer regions
222F_arrow	CAAT-box	CAAT	1442	4	+	Nicotiana glutinosa
222F_arrow	CAAT-box	CAAT	1570	4	-	Nicotiana glutinosa
222F_arrow	CAAT-box	CAAT	1605	4	-	Nicotiana glutinosa
222F_arrow	CAAT-box	CAAAT	1782	5	-	Pisum sativum	common cis-acting element in promoter and enhancer regions
222F_arrow	CAAT-box	CAAT	1841	4	-	Nicotiana glutinosa
222F_arrow	CAAT-box	CAAAT	1855	5	-	Pisum sativum	common cis-acting element in promoter and enhancer regions
222F_arrow	CAAT-box	CAAT	1891	4	+	Nicotiana glutinosa
222F_arrow	CAAT-box	CAAT	1937	4	+	Nicotiana glutinosa
222F_arrow	CAAT-box	CAAT	1966	4	+	Nicotiana glutinosa
222F_arrow	AT~TATA-box	TATATA	1468	6	-	Arabidopsis thaliana
222F_arrow	AT~TATA-box	TATATA	1470	6	-	Arabidopsis thaliana
222F_arrow	AT~TATA-box	TATATA	1472	6	-	Arabidopsis thaliana
222F_arrow	AT~TATA-box	TATATA	1474	6	-	Arabidopsis thaliana
222F_arrow	AT~TATA-box	TATATA	1553	6	-	Arabidopsis thaliana
222F_arrow		motif_sequence	257	4	+	organism	short_function
222F_arrow		motif_sequence	277	4	+	organism	short_function
222F_arrow		motif_sequence	384	4	-	organism	short_function
222F_arrow		motif_sequence	670	4	+	organism	short_function
222F_arrow		motif_sequence	681	4	+	organism	short_function
222F_arrow		motif_sequence	1395	4	+	organism	short_function
222F_arrow		motif_sequence	1762	4	+	organism	short_function
222F_arrow		motif_sequence	1868	4	+	organism	short_function
222F_arrow		motif_sequence	1923	4	+	organism	short_function
222F_arrow		motif_sequence	1968	4	+	organism	short_function
222F_arrow	AT-rich element	ATAGAAATCAA	1318	10	+	Glycine max	binding site of AT-rich DNA binding protein (ATBP-1)
222F_arrow	AT-rich element	ATAGAAATCAA	1434	10	+	Glycine max	binding site of AT-rich DNA binding protein (ATBP-1)
222F_arrow	G-Box	CACGTG	866	6	+	Pisum sativum	cis-acting regulatory element involved in light responsiveness
222F_arrow	G-Box	CACGTT	1023	6	-	Pisum sativum	cis-acting regulatory element involved in light responsiveness
222F_arrow	STRE	AGGGG	1884	5	-	Arabidopsis thaliana
222F_arrow	Box 4	ATTAAT	547	6	+	Petroselinum crispum	part of a conserved DNA module involved in light responsiveness
222F_arrow	Box 4	ATTAAT	1530	6	-	Petroselinum crispum	part of a conserved DNA module involved in light responsiveness
222F_arrow	Box 4	ATTAAT	1986	6	-	Petroselinum crispum	part of a conserved DNA module involved in light responsiveness
222F_arrow	Box 4	ATTAAT	1990	6	-	Petroselinum crispum	part of a conserved DNA module involved in light responsiveness
222F_arrow	MYB	CAACCA	833	6	+	Arabidopsis thaliana
222F_arrow	TGA-element	AACGAC	70	6	+	Brassica oleracea	auxin-responsive element
222F_arrow	TGA-element	AACGAC	1896	6	-	Brassica oleracea	auxin-responsive element
222F_arrow	ABRE3a	TACGTG	1030	6	+	Zea mays
222F_arrow	ABRE	CACGTG	866	6	+	Arabidopsis thaliana	cis-acting element involved in the abscisic acid responsiveness
222F_arrow	ABRE	ACGTG	867	5	+	Arabidopsis thaliana	cis-acting element involved in the abscisic acid responsiveness
222F_arrow	ABRE	ACGTG	1024	5	+	Arabidopsis thaliana	cis-acting element involved in the abscisic acid responsiveness
222F_arrow	ABRE	ACGTG	1031	5	+	Arabidopsis thaliana	cis-acting element involved in the abscisic acid responsiveness
222F_arrow	TCT-motif	TCTTAC	1372	6	+	Arabidopsis thaliana	part of a light responsive element
222F_arrow	ERE	ATTTTAAA	463	8	-	Nicotiana glutinos
222F_arrow	ERE	ATTTTAAA	915	8	+	Nicotiana glutinos
222F_arrow	ERE	ATTTTAAA	917	8	-	Nicotiana glutinos
222F_arrow	P-box	CCTTTTG	557	7	-	Oryza sativa	gibberellin-responsive element
222F_arrow	WUN-motif	AAATTACT	1115	8	-	Nicotiana glutinosa
222F_arrow	TGACG-motif	TGACG	253	5	-	Hordeum vulgare	cis-acting regulatory element involved in the MeJA-responsiveness
222F_arrow	GATA-motif	GATAGGA	662	7	-	Arabidopsis thaliana	part of a light responsive element
23F_arrow	CAT-box	GCCACT	641	6	-	Arabidopsis thaliana	cis-acting regulatory element related to meristem expression
23F_arrow	CAT-box	GCCACT	832	6	+	Arabidopsis thaliana	cis-acting regulatory element related to meristem expression
23F_arrow	AAGAA-motif	GAAAGAA	578	7	+	Avena sativa
23F_arrow	Unnamed__4	CTCC	308	4	+	Petroselinum hortense
23F_arrow	Unnamed__4	CTCC	340	4	+	Petroselinum hortense
23F_arrow	Unnamed__4	CTCC	391	4	-	Petroselinum hortense
23F_arrow	Unnamed__4	CTCC	1097	4	+	Petroselinum hortense
23F_arrow	Unnamed__4	CTCC	1223	4	+	Petroselinum hortense
23F_arrow	CGTCA-motif	CGTCA	1913	5	+	Hordeum vulgare	cis-acting regulatory element involved in the MeJA-responsiveness
23F_arrow	G-box	CACGTG	1308	6	-	Arabidopsis thaliana	cis-acting regulatory element involved in light responsiveness
23F_arrow	GT1-motif	GGTTAA	721	6	-	Arabidopsis thaliana	light responsive element
23F_arrow	MYC	CATTTG	710	6	-	Arabidopsis thaliana
23F_arrow	MYC	CATTTG	794	6	-	Arabidopsis thaliana
23F_arrow	Unnamed__2	AACCTAACCT	105	10	+	Petroselinum hortense
23F_arrow	TATA-box	TATACA	266	6	-	Helianthus annuus	core promoter element around -30 of transcription start
23F_arrow	TATA-box	TATA	268	4	+	Arabidopsis thaliana	core promoter element around -30 of transcription start
23F_arrow	TATA-box	TATA	358	4	+	Arabidopsis thaliana	core promoter element around -30 of transcription start
23F_arrow	TATA-box	TATAA	371	5	-	Arabidopsis thaliana	core promoter element around -30 of transcription start
23F_arrow	TATA-box	TATA	372	4	+	Arabidopsis thaliana	core promoter element around -30 of transcription start
23F_arrow	TATA-box	TATACA	529	6	-	Helianthus annuus	core promoter element around -30 of transcription start
23F_arrow	TATA-box	TATA	531	4	+	Arabidopsis thaliana	core promoter element around -30 of transcription start
23F_arrow	TATA-box	TATA	595	4	+	Arabidopsis thaliana	core promoter element around -30 of transcription start
23F_arrow	TATA-box	ATTATA	1010	6	+	Brassica napus	core promoter element around -30 of transcription start
23F_arrow	TATA-box	TATAA	1011	5	-	Arabidopsis thaliana	core promoter element around -30 of transcription start
23F_arrow	TATA-box	TATA	1012	4	-	Arabidopsis thaliana	core promoter element around -30 of transcription start
23F_arrow	TATA-box	TATA	1431	4	-	Arabidopsis thaliana	core promoter element around -30 of transcription start
23F_arrow	TATA-box	TATAA	1447	5	-	Arabidopsis thaliana	core promoter element around -30 of transcription start
23F_arrow	TATA-box	TATA	1448	4	-	Arabidopsis thaliana	core promoter element around -30 of transcription start
23F_arrow	TATA-box	TATA	1604	4	-	Arabidopsis thaliana	core promoter element around -30 of transcription start
23F_arrow	TATA-box	TATAAAA	1634	7	-	Pisum sativum	core promoter element around -30 of transcription start
23F_arrow	TATA-box	TATAAA	1635	6	-	Helianthus annuus	core promoter element around -30 of transcription start
23F_arrow	TATA-box	TATAA	1636	5	-	Arabidopsis thaliana	core promoter element around -30 of transcription start
23F_arrow	TATA-box	TATA	1637	4	-	Arabidopsis thaliana	core promoter element around -30 of transcription start
23F_arrow	TATA-box	TATA	1810	4	-	Arabidopsis thaliana	core promoter element around -30 of transcription start
23F_arrow	AC-I	(T/C)C(T/C)(C/T)ACC(T/C)ACC	1889	8.5	+	Phaseolus vulgaris
23F_arrow	as-1	TGACG	1913	5	-	Arabidopsis thaliana
23F_arrow	MYB-like sequence	TAACCA	597	6	+	Arabidopsis thaliana
23F_arrow	MYB-like sequence	TAACCA	822	6	+	Arabidopsis thaliana
23F_arrow	MYB-like sequence	TAACCA	1053	6	-	Arabidopsis thaliana
23F_arrow	MYB-like sequence	TAACCA	1949	6	-	Arabidopsis thaliana
23F_arrow	MRE	AACCTAA	105	7	+	Petroselinum crispum	MYB binding site involved in light responsiveness
23F_arrow		motif_sequence	6	4	+	organism	short_function
23F_arrow		motif_sequence	65	4	-	organism	short_function
23F_arrow		motif_sequence	96	4	-	organism	short_function
23F_arrow		motif_sequence	249	4	+	organism	short_function
23F_arrow		motif_sequence	286	4	-	organism	short_function
23F_arrow		motif_sequence	661	4	-	organism	short_function
23F_arrow		motif_sequence	699	4	-	organism	short_function
23F_arrow		motif_sequence	733	4	-	organism	short_function
23F_arrow		motif_sequence	855	4	-	organism	short_function
23F_arrow		motif_sequence	1785	4	+	organism	short_function
23F_arrow	GARE-motif	TCTGTTG	1529	7	-	Brassica oleracea	gibberellin-responsive element
23F_arrow	Myb	TAACTG	413	6	-	Arabidopsis thaliana
23F_arrow	Myb	TAACTG	656	6	+	Arabidopsis thaliana
23F_arrow	Myb	TAACTG	1516	6	-	Arabidopsis thaliana
23F_arrow	Myb	TAACTG	1576	6	-	Arabidopsis thaliana
23F_arrow	HD-Zip 1	CAAT(A/T)ATTG	1923	8	-	Arabidopsis thaliana	element involved in differentiation of the palisade mesophyll cells
23F_arrow	CAAT-box	CCAAT	14	5	-	Arabidopsis thaliana	common cis-acting element in promoter and enhancer regions
23F_arrow	CAAT-box	CAAT	20	4	-	Nicotiana glutinosa
23F_arrow	CAAT-box	CAAT	283	4	-	Nicotiana glutinosa
23F_arrow	CAAT-box	CAAT	335	4	-	Nicotiana glutinosa
23F_arrow	CAAT-box	CAAAT	376	5	-	Pisum sativum	common cis-acting element in promoter and enhancer regions
23F_arrow	CAAT-box	CCAAT	404	5	-	Arabidopsis thaliana	common cis-acting element in promoter and enhancer regions
23F_arrow	CAAT-box	CAAAT	456	5	+	Pisum sativum	common cis-acting element in promoter and enhancer regions
23F_arrow	CAAT-box	CCAAT	630	5	+	Arabidopsis thaliana	common cis-acting element in promoter and enhancer regions
23F_arrow	CAAT-box	CAAT	631	4	+	Nicotiana glutinosa
23F_arrow	CAAT-box	CAAAT	710	5	+	Pisum sativum	common cis-acting element in promoter and enhancer regions
23F_arrow	CAAT-box	CAAT	755	4	-	Nicotiana glutinosa
23F_arrow	CAAT-box	CAAAT	794	5	+	Pisum sativum	common cis-acting element in promoter and enhancer regions
23F_arrow	CAAT-box	CAAAT	826	5	+	Pisum sativum	common cis-acting element in promoter and enhancer regions
23F_arrow	CAAT-box	CAAT	829	4	-	Nicotiana glutinosa
23F_arrow	CAAT-box	CAAT	839	4	+	Nicotiana glutinosa
23F_arrow	CAAT-box	CAAAT	843	5	+	Pisum sativum	common cis-acting element in promoter and enhancer regions
23F_arrow	CAAT-box	CAAAT	889	5	+	Pisum sativum	common cis-acting element in promoter and enhancer regions
23F_arrow	CAAT-box	CCAAT	924	5	-	Arabidopsis thaliana	common cis-acting element in promoter and enhancer regions
23F_arrow	CAAT-box	CAAAT	1079	5	+	Pisum sativum	common cis-acting element in promoter and enhancer regions
23F_arrow	CAAT-box	CAAT	1082	4	-	Nicotiana glutinosa
23F_arrow	CAAT-box	CCAAT	1099	5	+	Arabidopsis thaliana	common cis-acting element in promoter and enhancer regions
23F_arrow	CAAT-box	CAAT	1100	4	+	Nicotiana glutinosa
23F_arrow	CAAT-box	CAAT	1109	4	+	Nicotiana glutinosa
23F_arrow	CAAT-box	CAAT	1265	4	+	Nicotiana glutinosa
23F_arrow	CAAT-box	CCAAT	1288	5	+	Arabidopsis thaliana	common cis-acting element in promoter and enhancer regions
23F_arrow	CAAT-box	CAAT	1289	4	+	Nicotiana glutinosa
23F_arrow	CAAT-box	CAAT	1315	4	+	Nicotiana glutinosa
23F_arrow	CAAT-box	CAAT	1333	4	-	Nicotiana glutinosa
23F_arrow	CAAT-box	CAAT	1346	4	-	Nicotiana glutinosa
23F_arrow	CAAT-box	CAAT	1371	4	-	Nicotiana glutinosa
23F_arrow	CAAT-box	CAAT	1384	4	-	Nicotiana glutinosa
23F_arrow	CAAT-box	CCAAT	1407	5	-	Arabidopsis thaliana	common cis-acting element in promoter and enhancer regions
23F_arrow	CAAT-box	CAAT	1416	4	-	Nicotiana glutinosa
23F_arrow	CAAT-box	CAAT	1420	4	+	Nicotiana glutinosa
23F_arrow	CAAT-box	CAAT	1491	4	+	Nicotiana glutinosa
23F_arrow	CAAT-box	CAAAT	1505	5	+	Pisum sativum	common cis-acting element in promoter and enhancer regions
23F_arrow	CAAT-box	CAAT	1508	4	-	Nicotiana glutinosa
23F_arrow	CAAT-box	CAAT	1525	4	+	Nicotiana glutinosa
23F_arrow	CAAT-box	CAAAT	1548	5	-	Pisum sativum	common cis-acting element in promoter and enhancer regions
23F_arrow	CAAT-box	CAAAT	1663	5	+	Pisum sativum	common cis-acting element in promoter and enhancer regions
23F_arrow	CAAT-box	CAAT	1793	4	-	Nicotiana glutinosa
23F_arrow	CAAT-box	CAAAT	1813	5	-	Pisum sativum	common cis-acting element in promoter and enhancer regions
23F_arrow	CAAT-box	CAAT	1916	4	+	Nicotiana glutinosa
23F_arrow	CAAT-box	CAAT	1923	4	+	Nicotiana glutinosa
23F_arrow	CAAT-box	CAAT	1928	4	-	Nicotiana glutinosa
23F_arrow	CAAT-box	CCAAT	1934	5	-	Arabidopsis thaliana	common cis-acting element in promoter and enhancer regions
23F_arrow	TCT-motif	TCTTAC	1685	6	-	Arabidopsis thaliana	part of a light responsive element
23F_arrow	F-box	CTATTCTCATT	6	10	+	Lycopersicon esculentum
23F_arrow	ABRE	CACGTG	1308	6	-	Arabidopsis thaliana	cis-acting element involved in the abscisic acid responsiveness
23F_arrow	ABRE	ACGTG	1309	5	+	Arabidopsis thaliana	cis-acting element involved in the abscisic acid responsiveness
23F_arrow	TCCC-motif	TCTCCCT	339	7	+	Spinacia oleracea	part of a light responsive element
23F_arrow	G-Box	CACGTG	1308	6	-	Pisum sativum	cis-acting regulatory element involved in light responsiveness
23F_arrow	DRE1	ACCGAGA	239	7	+	Zea mays
23F_arrow	STRE	AGGGG	1463	5	+	Arabidopsis thaliana
23F_arrow	MYB	TAACCA	597	6	+	Arabidopsis thaliana
23F_arrow	MYB	TAACCA	822	6	+	Arabidopsis thaliana
23F_arrow	MYB	TAACCA	1053	6	-	Arabidopsis thaliana
23F_arrow	MYB	CAACAG	1529	6	+	Arabidopsis thaliana
23F_arrow	MYB	CAACCA	1895	6	+	Arabidopsis thaliana
23F_arrow	MYB	TAACCA	1949	6	-	Arabidopsis thaliana
23F_arrow	MYB	CAACAG	1993	6	+	Arabidopsis thaliana
23F_arrow	L-box	ATCCCACCTAC	1888	10	+	Petroselinum crispum	part of a light responsive element
23F_arrow	AE-box	AGAAACTT	1982	8	-	Arabidopsis thaliana	part of a module for light response
23F_arrow	I-box	GTATAAGGCC	357	9	+	Larix laricina	part of a light responsive element
23F_arrow	GATA-motif	AAGGATAAGG	1212	9	-	Solanum tuberosum	part of a light responsive element
23F_arrow	P-box	CCTTTTG	1459	7	-	Oryza sativa	gibberellin-responsive element
23F_arrow	TGACG-motif	TGACG	1913	5	-	Hordeum vulgare	cis-acting regulatory element involved in the MeJA-responsiveness
23F_arrow	ATC-motif	AGTAATCT	243	8	-	Spinacia oleracea	part of a conserved DNA module involved in light responsiveness
23F_arrow	ARE	AAACCA	955	6	+	Zea mays	cis-acting regulatory element essential for the anaerobic induction
23F_arrow	ARE	AAACCA	1188	6	+	Zea mays	cis-acting regulatory element essential for the anaerobic induction
23F_arrow	ARE	AAACCA	1237	6	+	Zea mays	cis-acting regulatory element essential for the anaerobic induction
23F_arrow	ARE	AAACCA	1936	6	-	Zea mays	cis-acting regulatory element essential for the anaerobic induction
23F_arrow	Myb-binding site	CAACAG	1529	6	+	Nicotiana tabacum
23F_arrow	Myb-binding site	CAACAG	1993	6	+	Nicotiana tabacum
247F_arrow	G-Box	CACGTT	11	6	-	Pisum sativum	cis-acting regulatory element involved in light responsiveness
247F_arrow	STRE	AGGGG	512	5	-	Arabidopsis thaliana
247F_arrow	STRE	AGGGG	723	5	+	Arabidopsis thaliana
247F_arrow	CCGTCC motif	CCGTCC	1408	6	+	Nicotiana tabacum
247F_arrow	MYB	CAACCA	1205	6	-	Arabidopsis thaliana
247F_arrow	MYB	CAACAG	1261	6	+	Arabidopsis thaliana
247F_arrow	MYB	CAACAG	1430	6	+	Arabidopsis thaliana
247F_arrow	ABRE3a	TACGTG	294	6	+	Zea mays
247F_arrow	ABRE	GCAACGTGTC	9	9	+	Hordeum vulgare	cis-acting element involved in the abscisic acid responsiveness
247F_arrow	ABRE	ACGTG	12	5	+	Arabidopsis thaliana	cis-acting element involved in the abscisic acid responsiveness
247F_arrow	ABRE	ACGTG	295	5	+	Arabidopsis thaliana	cis-acting element involved in the abscisic acid responsiveness
247F_arrow	Myc	TCTCTTA	211	7	-	Arabidopsis thaliana
247F_arrow	box S	AGCCACC	831	7	-	Arabidopsis thaliana
247F_arrow	circadian	CAAAGATATC	1267	9	-	Lycopersicon esculentum	cis-acting regulatory element involved in circadian control
247F_arrow	ARE	AAACCA	765	6	+	Zea mays	cis-acting regulatory element essential for the anaerobic induction
247F_arrow	CCGTCC-box	CCGTCC	1408	6	+	Petroselinum hortense
247F_arrow	W box	TTGACC	932	6	-	Arabidopsis thaliana
247F_arrow	W box	TTGACC	1787	6	-	Arabidopsis thaliana
247F_arrow	Myb-binding site	CAACAG	1261	6	+	Nicotiana tabacum
247F_arrow	Myb-binding site	CAACAG	1430	6	+	Nicotiana tabacum
247F_arrow	AE-box	AGAAACAA	944	8	+	Arabidopsis thaliana	part of a module for light response
247F_arrow	I-box	gGATAAGGTG	627	9	-	Zea mays	part of a light responsive element
247F_arrow	Sp1	GGGCGG	615	6	-	Oryza sativa	light responsive element
247F_arrow	LTR	CCGAAA	619	6	+	Hordeum vulgare	cis-acting element involved in low-temperature responsiveness
247F_arrow	LTR	CCGAAA	1187	6	+	Hordeum vulgare	cis-acting element involved in low-temperature responsiveness
247F_arrow	GATA-motif	AAGATAAGATT	226	10	-	Arabidopsis thaliana	part of a light responsive element
247F_arrow	GATA-motif	GATAGGA	323	7	+	Arabidopsis thaliana	part of a light responsive element
247F_arrow	GATA-motif	GATAGGA	333	7	-	Arabidopsis thaliana	part of a light responsive element
247F_arrow	ABRE4	CACGTA	294	6	-	Zea mays
247F_arrow	MYC	CATTTG	702	6	-	Arabidopsis thaliana
247F_arrow	MYC	CAATTG	769	6	+	Arabidopsis thaliana
247F_arrow	MYC	CAATTG	1423	6	-	Arabidopsis thaliana
247F_arrow	TATC-box	TATCCCA	1228	7	+	Oryza sativa	cis-acting element involved in gibberellin-responsiveness
247F_arrow	TATC-box	TATCCCA	1608	7	-	Oryza sativa	cis-acting element involved in gibberellin-responsiveness
247F_arrow	TATA-box	ATATAT	120	6	+	Brassica napus	core promoter element around -30 of transcription start
247F_arrow	TATA-box	TATA	121	4	+	Arabidopsis thaliana	core promoter element around -30 of transcription start
247F_arrow	TATA-box	ATATAT	185	6	+	Brassica napus	core promoter element around -30 of transcription start
247F_arrow	TATA-box	TATA	186	4	+	Arabidopsis thaliana	core promoter element around -30 of transcription start
247F_arrow	TATA-box	ATTATA	189	6	+	Brassica napus	core promoter element around -30 of transcription start
247F_arrow	TATA-box	TATATAA	190	7	-	Arabidopsis thaliana	core promoter element around -30 of transcription start
247F_arrow	TATA-box	TATATA	191	6	+	Arabidopsis thaliana	core promoter element around -30 of transcription start
247F_arrow	TATA-box	ATATAA	192	6	+	Brassica oleracea	core promoter element around -30 of transcription start
247F_arrow	TATA-box	TATA	193	4	+	Arabidopsis thaliana	core promoter element around -30 of transcription start
247F_arrow	TATA-box	TATATAA	200	7	-	Arabidopsis thaliana	core promoter element around -30 of transcription start
247F_arrow	TATA-box	TATATA	201	6	+	Arabidopsis thaliana	core promoter element around -30 of transcription start
247F_arrow	TATA-box	ATATAT	202	6	+	Brassica napus	core promoter element around -30 of transcription start
247F_arrow	TATA-box	TATATA	203	6	+	Arabidopsis thaliana	core promoter element around -30 of transcription start
247F_arrow	TATA-box	TATA	205	4	+	Arabidopsis thaliana	core promoter element around -30 of transcription start
247F_arrow	TATA-box	TATA	410	4	+	Arabidopsis thaliana	core promoter element around -30 of transcription start
247F_arrow	TATA-box	ATATAT	535	6	+	Brassica napus	core promoter element around -30 of transcription start
247F_arrow	TATA-box	TATATA	536	6	+	Arabidopsis thaliana	core promoter element around -30 of transcription start
247F_arrow	TATA-box	ATATAT	537	6	+	Brassica napus	core promoter element around -30 of transcription start
247F_arrow	TATA-box	TATATA	538	6	+	Arabidopsis thaliana	core promoter element around -30 of transcription start
247F_arrow	TATA-box	TATA	540	4	+	Arabidopsis thaliana	core promoter element around -30 of transcription start
247F_arrow	TATA-box	TATACA	1025	6	-	Helianthus annuus	core promoter element around -30 of transcription start
247F_arrow	TATA-box	TATA	1027	4	-	Arabidopsis thaliana	core promoter element around -30 of transcription start
247F_arrow	TATA-box	TATTTAAA	1176	8	-	Arabidopsis thaliana	core promoter element around -30 of transcription start
247F_arrow	TATA-box	TATA	1477	4	-	Arabidopsis thaliana	core promoter element around -30 of transcription start
247F_arrow	TATA-box	TATACA	1521	6	-	Helianthus annuus	core promoter element around -30 of transcription start
247F_arrow	TATA-box	TATA	1523	4	-	Arabidopsis thaliana	core promoter element around -30 of transcription start
247F_arrow	TC-rich repeats	ATTCTCTAAC	504	9	+	Nicotiana tabacum	cis-acting element involved in defense and stress responsiveness
247F_arrow	CAT-box	GCCACT	74	6	+	Arabidopsis thaliana	cis-acting regulatory element related to meristem expression
247F_arrow	AAGAA-motif	GAAAGAA	244	7	-	Avena sativa
247F_arrow	Unnamed__4	CTCC	471	4	+	Petroselinum hortense
247F_arrow	Unnamed__4	CTCC	554	4	+	Petroselinum hortense
247F_arrow	Unnamed__4	CTCC	657	4	+	Petroselinum hortense
247F_arrow	Unnamed__4	CTCC	726	4	-	Petroselinum hortense
247F_arrow	Unnamed__4	CTCC	738	4	+	Petroselinum hortense
247F_arrow	Unnamed__4	CTCC	848	4	+	Petroselinum hortense
247F_arrow	Unnamed__4	CTCC	1053	4	+	Petroselinum hortense
247F_arrow	Unnamed__4	CTCC	1342	4	-	Petroselinum hortense
247F_arrow	Unnamed__4	CTCC	1380	4	+	Petroselinum hortense
247F_arrow	Unnamed__4	CTCC	1733	4	+	Petroselinum hortense
247F_arrow	Unnamed__4	CTCC	1866	4	+	Petroselinum hortense
247F_arrow	Unnamed__4	CTCC	1909	4	+	Petroselinum hortense
247F_arrow	Unnamed__4	CTCC	1935	4	+	Petroselinum hortense
247F_arrow	Unnamed__4	CTCC	1994	4	-	Petroselinum hortense
247F_arrow	ACTCATCCT sequence	ACTCATCCT	1683	9	+	Arabidopsis thaliana
247F_arrow	GT1-motif	GGTTAA	1248	6	+	Arabidopsis thaliana	light responsive element
247F_arrow	G-box	TACGTG	294	6	+	Arabidopsis thaliana	cis-acting regulatory element involved in light responsiveness
247F_arrow	A-box	CCGTCC	1408	6	+	Petroselinum crispum	cis-acting regulatory element
247F_arrow	Myb	TAACTG	279	6	+	Arabidopsis thaliana
247F_arrow	Myb	TAACTG	1692	6	+	Arabidopsis thaliana
247F_arrow	HD-Zip 1	CAAT(A/T)ATTG	1100	8	-	Arabidopsis thaliana	element involved in differentiation of the palisade mesophyll cells
247F_arrow	CAAT-box	CAAT	183	4	+	Nicotiana glutinosa
247F_arrow	CAAT-box	CAAAT	319	5	-	Pisum sativum	common cis-acting element in promoter and enhancer regions
247F_arrow	CAAT-box	CAAT	393	4	+	Nicotiana glutinosa
247F_arrow	CAAT-box	CAAT	413	4	-	Nicotiana glutinosa
247F_arrow	CAAT-box	CAAT	548	4	+	Nicotiana glutinosa
247F_arrow	CAAT-box	CAAT	563	4	+	Nicotiana glutinosa
247F_arrow	CAAT-box	CCAAT	570	5	+	Arabidopsis thaliana	common cis-acting element in promoter and enhancer regions
247F_arrow	CAAT-box	CAAT	571	4	+	Nicotiana glutinosa
247F_arrow	CAAT-box	CAAT	606	4	+	Nicotiana glutinosa
247F_arrow	CAAT-box	CAAT	665	4	+	Nicotiana glutinosa
247F_arrow	CAAT-box	CAAAT	702	5	+	Pisum sativum	common cis-acting element in promoter and enhancer regions
247F_arrow	CAAT-box	CCAAT	768	5	+	Arabidopsis thaliana	common cis-acting element in promoter and enhancer regions
247F_arrow	CAAT-box	CAAT	769	4	+	Nicotiana glutinosa
247F_arrow	CAAT-box	CAAT	771	4	-	Nicotiana glutinosa
247F_arrow	CAAT-box	CAAT	780	4	-	Nicotiana glutinosa
247F_arrow	CAAT-box	CAAAT	935	5	+	Pisum sativum	common cis-acting element in promoter and enhancer regions
247F_arrow	CAAT-box	CAAT	949	4	+	Nicotiana glutinosa
247F_arrow	CAAT-box	CAAT	992	4	-	Nicotiana glutinosa
247F_arrow	CAAT-box	CAAT	1008	4	+	Nicotiana glutinosa
247F_arrow	CAAT-box	CAAT	1100	4	+	Nicotiana glutinosa
247F_arrow	CAAT-box	CAAT	1105	4	-	Nicotiana glutinosa
247F_arrow	CAAT-box	CAAT	1147	4	-	Nicotiana glutinosa
247F_arrow	CAAT-box	CAAT	1161	4	+	Nicotiana glutinosa
247F_arrow	CAAT-box	CCAAT	1203	5	-	Arabidopsis thaliana	common cis-acting element in promoter and enhancer regions
247F_arrow	CAAT-box	TGCCAAC	1207	7	-	Petunia hybrida	common cis-acting element in promoter and enhancer regions
247F_arrow	CAAT-box	CCAAT	1303	5	+	Arabidopsis thaliana	common cis-acting element in promoter and enhancer regions
247F_arrow	CAAT-box	CAAT	1304	4	+	Nicotiana glutinosa
247F_arrow	CAAT-box	CCAAT	1355	5	+	Arabidopsis thaliana	common cis-acting element in promoter and enhancer regions
247F_arrow	CAAT-box	CAAT	1356	4	+	Nicotiana glutinosa
247F_arrow	CAAT-box	CAAT	1423	4	+	Nicotiana glutinosa
247F_arrow	CAAT-box	CAAT	1425	4	-	Nicotiana glutinosa
247F_arrow	CAAT-box	CCAAT	1464	5	+	Arabidopsis thaliana	common cis-acting element in promoter and enhancer regions
247F_arrow	CAAT-box	CAAT	1465	4	+	Nicotiana glutinosa
247F_arrow	CAAT-box	CAAT	1571	4	-	Nicotiana glutinosa
247F_arrow	CAAT-box	CCAAT	1606	5	-	Arabidopsis thaliana	common cis-acting element in promoter and enhancer regions
247F_arrow	CAAT-box	CCAAT	1712	5	+	Arabidopsis thaliana	common cis-acting element in promoter and enhancer regions
247F_arrow	CAAT-box	CAAT	1713	4	+	Nicotiana glutinosa
247F_arrow	CAAT-box	CCAAT	1735	5	+	Arabidopsis thaliana	common cis-acting element in promoter and enhancer regions
247F_arrow	CAAT-box	CAAT	1736	4	+	Nicotiana glutinosa
247F_arrow	CAAT-box	CCAAT	1766	5	-	Arabidopsis thaliana	common cis-acting element in promoter and enhancer regions
247F_arrow	AT~TATA-box	TATATA	191	6	+	Arabidopsis thaliana
247F_arrow	AT~TATA-box	TATATA	201	6	+	Arabidopsis thaliana
247F_arrow	AT~TATA-box	TATATA	203	6	+	Arabidopsis thaliana
247F_arrow	AT~TATA-box	TATATA	536	6	+	Arabidopsis thaliana
247F_arrow	AT~TATA-box	TATATA	538	6	+	Arabidopsis thaliana
247F_arrow		motif_sequence	86	4	+	organism	short_function
247F_arrow		motif_sequence	142	4	+	organism	short_function
247F_arrow		motif_sequence	232	4	+	organism	short_function
247F_arrow		motif_sequence	265	4	-	organism	short_function
247F_arrow		motif_sequence	469	4	+	organism	short_function
247F_arrow		motif_sequence	507	4	+	organism	short_function
247F_arrow		motif_sequence	726	4	-	organism	short_function
247F_arrow		motif_sequence	818	4	-	organism	short_function
247F_arrow		motif_sequence	906	4	+	organism	short_function
247F_arrow		motif_sequence	1000	4	+	organism	short_function
247F_arrow		motif_sequence	1211	4	-	organism	short_function
247F_arrow		motif_sequence	1342	4	-	organism	short_function
247F_arrow		motif_sequence	1378	4	+	organism	short_function
247F_arrow		motif_sequence	1392	4	-	organism	short_function
247F_arrow		motif_sequence	1530	4	-	organism	short_function
247F_arrow		motif_sequence	1574	4	-	organism	short_function
247F_arrow		motif_sequence	1695	4	+	organism	short_function
247F_arrow		motif_sequence	1842	4	+	organism	short_function
247F_arrow		motif_sequence	1852	4	+	organism	short_function
247F_arrow		motif_sequence	1875	4	-	organism	short_function
247F_arrow		motif_sequence	1921	4	+	organism	short_function
247F_arrow		motif_sequence	1974	4	+	organism	short_function
283F_arrow	TCA-element	TCAGAAGAGG	1900	9	+	Brassica oleracea	cis-acting element involved in salicylic acid responsiveness
283F_arrow	Myb	TAACTG	432	6	-	Arabidopsis thaliana
283F_arrow	Myb	TAACTG	1494	6	+	Arabidopsis thaliana
283F_arrow	Unnamed__1	CGTGG	820	5	-	Zea mays
283F_arrow	Unnamed__1	CGTGG	1055	5	+	Zea mays
283F_arrow	Unnamed__1	GCCACGTGGC	1250	10	-	Petunia sp.
283F_arrow	Unnamed__1	CGTGG	1251	5	-	Zea mays
283F_arrow	Unnamed__1	CGTGG	1254	5	+	Zea mays
283F_arrow	CAAT-box	CAAT	8	4	-	Nicotiana glutinosa
283F_arrow	CAAT-box	CAAT	60	4	-	Nicotiana glutinosa
283F_arrow	CAAT-box	CAAT	66	4	-	Nicotiana glutinosa
283F_arrow	CAAT-box	CAAAT	81	5	+	Pisum sativum	common cis-acting element in promoter and enhancer regions
283F_arrow	CAAT-box	CAAT	105	4	-	Nicotiana glutinosa
283F_arrow	CAAT-box	CCAAT	198	5	+	Arabidopsis thaliana	common cis-acting element in promoter and enhancer regions
283F_arrow	CAAT-box	CAAT	199	4	+	Nicotiana glutinosa
283F_arrow	CAAT-box	CAAAT	239	5	+	Pisum sativum	common cis-acting element in promoter and enhancer regions
283F_arrow	CAAT-box	CAAT	359	4	-	Nicotiana glutinosa
283F_arrow	CAAT-box	CAAAT	369	5	+	Pisum sativum	common cis-acting element in promoter and enhancer regions
283F_arrow	CAAT-box	CAAT	378	4	-	Nicotiana glutinosa
283F_arrow	CAAT-box	CAAT	384	4	-	Nicotiana glutinosa
283F_arrow	CAAT-box	TGCCAAC	386	7	+	Petunia hybrida	common cis-acting element in promoter and enhancer regions
283F_arrow	CAAT-box	CAAAT	449	5	+	Pisum sativum	common cis-acting element in promoter and enhancer regions
283F_arrow	CAAT-box	CAAT	493	4	+	Nicotiana glutinosa
283F_arrow	CAAT-box	CCAAT	516	5	+	Arabidopsis thaliana	common cis-acting element in promoter and enhancer regions
283F_arrow	CAAT-box	CAAT	517	4	+	Nicotiana glutinosa
283F_arrow	CAAT-box	CAAT	562	4	-	Nicotiana glutinosa
283F_arrow	CAAT-box	CAAT	651	4	-	Nicotiana glutinosa
283F_arrow	CAAT-box	CAAT	703	4	+	Nicotiana glutinosa
283F_arrow	CAAT-box	CCAAT	756	5	+	Arabidopsis thaliana	common cis-acting element in promoter and enhancer regions
283F_arrow	CAAT-box	CAAT	757	4	+	Nicotiana glutinosa
283F_arrow	CAAT-box	CAAT	1046	4	+	Nicotiana glutinosa
283F_arrow	CAAT-box	CAAT	1125	4	-	Nicotiana glutinosa
283F_arrow	CAAT-box	CAAT	1174	4	+	Nicotiana glutinosa
283F_arrow	CAAT-box	CAAT	1185	4	-	Nicotiana glutinosa
283F_arrow	CAAT-box	CAAAT	1413	5	-	Pisum sativum	common cis-acting element in promoter and enhancer regions
283F_arrow	CAAT-box	CAAT	1433	4	+	Nicotiana glutinosa
283F_arrow	CAAT-box	CAAT	1485	4	-	Nicotiana glutinosa
283F_arrow	CAAT-box	CAAT	1538	4	+	Nicotiana glutinosa
283F_arrow	CAAT-box	CAAT	1646	4	+	Nicotiana glutinosa
283F_arrow	CAAT-box	CAAAT	1679	5	-	Pisum sativum	common cis-acting element in promoter and enhancer regions
283F_arrow	CAAT-box	CAAT	1697	4	-	Nicotiana glutinosa
283F_arrow	CAAT-box	CAAT	1722	4	+	Nicotiana glutinosa
283F_arrow	CAAT-box	CAAAT	1826	5	-	Pisum sativum	common cis-acting element in promoter and enhancer regions
283F_arrow	CAAT-box	CAAT	1955	4	-	Nicotiana glutinosa
283F_arrow	CAAT-box	CAAT	1961	4	+	Nicotiana glutinosa
283F_arrow	CAAT-box	CAAT	1974	4	-	Nicotiana glutinosa
283F_arrow	CAAT-box	CCAAT	1979	5	-	Arabidopsis thaliana	common cis-acting element in promoter and enhancer regions
283F_arrow	CAAT-box	CAAT	1989	4	+	Nicotiana glutinosa
283F_arrow	AT~TATA-box	TATATA	138	6	+	Arabidopsis thaliana
283F_arrow	AT~TATA-box	TATATA	140	6	+	Arabidopsis thaliana
283F_arrow	AT~TATA-box	TATATA	162	6	+	Arabidopsis thaliana
283F_arrow	AT~TATA-box	TATATA	164	6	+	Arabidopsis thaliana
283F_arrow	AT~TATA-box	TATATAAA	170	8	-	Arabidopsis thaliana
283F_arrow	AT~TATA-box	TATATA	172	6	+	Arabidopsis thaliana
283F_arrow	AT~TATA-box	TATATA	174	6	+	Arabidopsis thaliana
283F_arrow	AT~TATA-box	TATATA	176	6	+	Arabidopsis thaliana
283F_arrow	AT~TATA-box	TATATA	178	6	+	Arabidopsis thaliana
283F_arrow	AT~TATA-box	TATATA	180	6	+	Arabidopsis thaliana
283F_arrow	AT~TATA-box	TATATA	182	6	+	Arabidopsis thaliana
283F_arrow	AT~TATA-box	TATATA	349	6	+	Arabidopsis thaliana
283F_arrow	AT~TATA-box	TATATA	601	6	+	Arabidopsis thaliana
283F_arrow	MYB-like sequence	TAACCA	26	6	+	Arabidopsis thaliana
283F_arrow	MYB-like sequence	TAACCA	192	6	+	Arabidopsis thaliana
283F_arrow	MYB-like sequence	TAACCA	1656	6	+	Arabidopsis thaliana
283F_arrow	MYB-like sequence	TAACCA	1710	6	+	Arabidopsis thaliana
283F_arrow	MYB-like sequence	TAACCA	1758	6	+	Arabidopsis thaliana
283F_arrow	JERE	AGACCGCC	1555	8	+	Arabidopsis thaliana
283F_arrow	ABRE2	CCACGTGG	1251	8	-	Zea mays
283F_arrow		motif_sequence	108	4	-	organism	short_function
283F_arrow		motif_sequence	255	4	-	organism	short_function
283F_arrow		motif_sequence	800	4	+	organism	short_function
283F_arrow		motif_sequence	994	4	+	organism	short_function
283F_arrow		motif_sequence	1193	4	-	organism	short_function
283F_arrow		motif_sequence	1246	4	+	organism	short_function
283F_arrow		motif_sequence	1321	4	+	organism	short_function
283F_arrow		motif_sequence	1503	4	-	organism	short_function
283F_arrow		motif_sequence	1724	4	+	organism	short_function
283F_arrow		motif_sequence	1982	4	-	organism	short_function
283F_arrow	MYC	CATTTG	239	6	-	Arabidopsis thaliana
283F_arrow	MYC	CATTTG	449	6	-	Arabidopsis thaliana
283F_arrow	MYC	CATGTG	733	6	-	Arabidopsis thaliana
283F_arrow	MYC	CATGTG	735	6	+	Arabidopsis thaliana
283F_arrow	ABRE4	CACGTA	893	6	+	Zea mays
283F_arrow	Unnamed__2	AACCTAACCT	743	9	+	Petroselinum hortense
283F_arrow	TATC-box	TATCCCA	276	7	-	Oryza sativa	cis-acting element involved in gibberellin-responsiveness
283F_arrow	TATA-box	TATAAA	22	6	-	Helianthus annuus	core promoter element around -30 of transcription start
283F_arrow	TATA-box	TATAA	23	5	-	Arabidopsis thaliana	core promoter element around -30 of transcription start
283F_arrow	TATA-box	TATA	24	4	+	Arabidopsis thaliana	core promoter element around -30 of transcription start
283F_arrow	TATA-box	TATATA	138	6	+	Arabidopsis thaliana	core promoter element around -30 of transcription start
283F_arrow	TATA-box	ATATAT	139	6	+	Brassica napus	core promoter element around -30 of transcription start
283F_arrow	TATA-box	TATATA	140	6	+	Arabidopsis thaliana	core promoter element around -30 of transcription start
283F_arrow	TATA-box	ATATAA	141	6	+	Brassica oleracea	core promoter element around -30 of transcription start
283F_arrow	TATA-box	TATA	142	4	+	Arabidopsis thaliana	core promoter element around -30 of transcription start
283F_arrow	TATA-box	ATATAA	146	6	+	Brassica oleracea	core promoter element around -30 of transcription start
283F_arrow	TATA-box	TATA	147	4	+	Arabidopsis thaliana	core promoter element around -30 of transcription start
283F_arrow	TATA-box	ATATAA	151	6	+	Brassica oleracea	core promoter element around -30 of transcription start
283F_arrow	TATA-box	TATA	152	4	+	Arabidopsis thaliana	core promoter element around -30 of transcription start
283F_arrow	TATA-box	ATATAA	156	6	+	Brassica oleracea	core promoter element around -30 of transcription start
283F_arrow	TATA-box	TATA	157	4	+	Arabidopsis thaliana	core promoter element around -30 of transcription start
283F_arrow	TATA-box	ATATAT	161	6	+	Brassica napus	core promoter element around -30 of transcription start
283F_arrow	TATA-box	TATATA	162	6	+	Arabidopsis thaliana	core promoter element around -30 of transcription start
283F_arrow	TATA-box	ATATAT	163	6	+	Brassica napus	core promoter element around -30 of transcription start
283F_arrow	TATA-box	TATATA	164	6	+	Arabidopsis thaliana	core promoter element around -30 of transcription start
283F_arrow	TATA-box	ATATAT	165	6	+	Brassica napus	core promoter element around -30 of transcription start
283F_arrow	TATA-box	TATATTTATATTT	166	12	+	Avena sativa	core promoter element around -30 of transcription start
283F_arrow	TATA-box	taTATAAAtc	168	9	-	Arabidopsis thaliana	core promoter element around -30 of transcription start
283F_arrow	TATA-box	TATAAAT	169	7	-	Brassica juncea	core promoter element around -30 of transcription start
283F_arrow	TATA-box	TATAAA	170	6	-	Helianthus annuus	core promoter element around -30 of transcription start
283F_arrow	TATA-box	TATATAA	171	7	-	Arabidopsis thaliana	core promoter element around -30 of transcription start
283F_arrow	TATA-box	TATATA	172	6	+	Arabidopsis thaliana	core promoter element around -30 of transcription start
283F_arrow	TATA-box	ATATAT	173	6	+	Brassica napus	core promoter element around -30 of transcription start
283F_arrow	TATA-box	TATATA	174	6	+	Arabidopsis thaliana	core promoter element around -30 of transcription start
283F_arrow	TATA-box	ATATAT	175	6	+	Brassica napus	core promoter element around -30 of transcription start
283F_arrow	TATA-box	TATATA	176	6	+	Arabidopsis thaliana	core promoter element around -30 of transcription start
283F_arrow	TATA-box	ATATAT	177	6	+	Brassica napus	core promoter element around -30 of transcription start
283F_arrow	TATA-box	TATATA	178	6	+	Arabidopsis thaliana	core promoter element around -30 of transcription start
283F_arrow	TATA-box	ATATAT	179	6	+	Brassica napus	core promoter element around -30 of transcription start
283F_arrow	TATA-box	TATATA	180	6	+	Arabidopsis thaliana	core promoter element around -30 of transcription start
283F_arrow	TATA-box	ATATAT	181	6	+	Brassica napus	core promoter element around -30 of transcription start
283F_arrow	TATA-box	TATATA	182	6	+	Arabidopsis thaliana	core promoter element around -30 of transcription start
283F_arrow	TATA-box	ATATAT	183	6	+	Brassica napus	core promoter element around -30 of transcription start
283F_arrow	TATA-box	TATA	184	4	+	Arabidopsis thaliana	core promoter element around -30 of transcription start
283F_arrow	TATA-box	ATATAT	348	6	+	Brassica napus	core promoter element around -30 of transcription start
283F_arrow	TATA-box	TATATA	349	6	+	Arabidopsis thaliana	core promoter element around -30 of transcription start
283F_arrow	TATA-box	ATATAA	350	6	+	Brassica oleracea	core promoter element around -30 of transcription start
283F_arrow	TATA-box	TATA	351	4	+	Arabidopsis thaliana	core promoter element around -30 of transcription start
283F_arrow	TATA-box	ATATAT	355	6	+	Brassica napus	core promoter element around -30 of transcription start
283F_arrow	TATA-box	TATA	356	4	+	Arabidopsis thaliana	core promoter element around -30 of transcription start
283F_arrow	TATA-box	ATTATA	372	6	+	Brassica napus	core promoter element around -30 of transcription start
283F_arrow	TATA-box	TATAA	373	5	-	Arabidopsis thaliana	core promoter element around -30 of transcription start
283F_arrow	TATA-box	TATA	374	4	+	Arabidopsis thaliana	core promoter element around -30 of transcription start
283F_arrow	TATA-box	ATATAT	600	6	+	Brassica napus	core promoter element around -30 of transcription start
283F_arrow	TATA-box	TATATA	601	6	+	Arabidopsis thaliana	core promoter element around -30 of transcription start
283F_arrow	TATA-box	ATATAA	602	6	+	Brassica oleracea	core promoter element around -30 of transcription start
283F_arrow	TATA-box	TATA	603	4	+	Arabidopsis thaliana	core promoter element around -30 of transcription start
283F_arrow	TATA-box	TATA	1205	4	-	Arabidopsis thaliana	core promoter element around -30 of transcription start
283F_arrow	TATA-box	TACAAAA	1359	7	-	Oryza sativa	core promoter element around -30 of transcription start
283F_arrow	TATA-box	TATAA	1372	5	-	Arabidopsis thaliana	core promoter element around -30 of transcription start
283F_arrow	TATA-box	TATA	1373	4	-	Arabidopsis thaliana	core promoter element around -30 of transcription start
283F_arrow	TATA-box	taTATAAAtc	1417	9	-	Arabidopsis thaliana	core promoter element around -30 of transcription start
283F_arrow	TATA-box	ATATAA	1422	6	+	Brassica oleracea	core promoter element around -30 of transcription start
283F_arrow	TATA-box	TATA	1423	4	-	Arabidopsis thaliana	core promoter element around -30 of transcription start
283F_arrow	TATA-box	ATTATA	1438	6	+	Brassica napus	core promoter element around -30 of transcription start
283F_arrow	TATA-box	TATAA	1439	5	-	Arabidopsis thaliana	core promoter element around -30 of transcription start
283F_arrow	TATA-box	TATA	1440	4	-	Arabidopsis thaliana	core promoter element around -30 of transcription start
283F_arrow	TATA-box	TATAAAA	1619	7	-	Pisum sativum	core promoter element around -30 of transcription start
283F_arrow	TATA-box	TATAAA	1620	6	-	Helianthus annuus	core promoter element around -30 of transcription start
283F_arrow	TATA-box	TATAA	1621	5	-	Arabidopsis thaliana	core promoter element around -30 of transcription start
283F_arrow	TATA-box	TATA	1622	4	-	Arabidopsis thaliana	core promoter element around -30 of transcription start
283F_arrow	TATA	TATAAAAT	603	8	+	Arabidopsis thaliana
283F_arrow	TATA	TATAAAAT	1618	8	-	Arabidopsis thaliana
283F_arrow	as-1	TGACG	904	5	-	Arabidopsis thaliana
283F_arrow	AAGAA-motif	GAAAGAA	222	7	+	Avena sativa
283F_arrow	AAGAA-motif	gGTAAAGAAA	392	9	+	Avena sativa
283F_arrow	AAGAA-motif	GAAAGAA	1893	7	-	Avena sativa
283F_arrow	Unnamed__4	CTCC	689	4	+	Petroselinum hortense
283F_arrow	Unnamed__4	CTCC	802	4	+	Petroselinum hortense
283F_arrow	Unnamed__4	CTCC	926	4	+	Petroselinum hortense
283F_arrow	Unnamed__4	CTCC	982	4	+	Petroselinum hortense
283F_arrow	Unnamed__4	CTCC	1068	4	+	Petroselinum hortense
283F_arrow	Unnamed__4	CTCC	1323	4	+	Petroselinum hortense
283F_arrow	Unnamed__4	CTCC	1726	4	+	Petroselinum hortense
283F_arrow	Unnamed__4	CTCC	1773	4	+	Petroselinum hortense
283F_arrow	Unnamed__4	CTCC	1982	4	-	Petroselinum hortense
283F_arrow	LAMP-element	CCTTATCCA	510	9	+	Spinacia oleracea	part of a light responsive element
283F_arrow	G-box	TACGTG	893	6	-	Arabidopsis thaliana	cis-acting regulatory element involved in light responsiveness
283F_arrow	G-box	CACGTC	899	6	+	Zea mays	cis-acting regulatory element involved in light responsiveness
283F_arrow	G-box	CACGAC	1053	6	-	Zea mays	cis-acting regulatory element involved in light responsiveness
283F_arrow	G-box	CTTCCACGTGGCA	1248	12	+	Arabidopsis thaliana	cis-acting regulatory element involved in light responsiveness
283F_arrow	G-box	tgACACGTGGCA	1249	11	-	Lycopersicon esculentum	cis-acting regulatory element involved in light responsiveness
283F_arrow	G-box	GCCACGTGGA	1250	9	-	Arabidopsis thaliana	cis-acting regulatory element involved in light responsiveness
283F_arrow	G-box	CACGTG	1252	6	-	Arabidopsis thaliana	cis-acting regulatory element involved in light responsiveness
283F_arrow	CGTCA-motif	CGTCA	904	5	+	Hordeum vulgare	cis-acting regulatory element involved in the MeJA-responsiveness
283F_arrow	GT1-motif	GGTTAA	191	6	-	Arabidopsis thaliana	light responsive element
283F_arrow	GT1-motif	GGTTAA	1757	6	-	Arabidopsis thaliana	light responsive element
283F_arrow	WUN-motif	TTATTACAT	259	9	-	Nicotiana glutinosa
283F_arrow	WUN-motif	TTATTACAT	478	9	-	Nicotiana glutinosa
283F_arrow	WUN-motif	CCATTTCAA	1379	9	-	Nicotiana glutinosa
283F_arrow	P-box	CCTTTTG	311	7	-	Oryza sativa	gibberellin-responsive element
283F_arrow	TGACG-motif	TGACG	904	5	-	Hordeum vulgare	cis-acting regulatory element involved in the MeJA-responsiveness
283F_arrow	W box	TTGACC	793	6	-	Arabidopsis thaliana
283F_arrow	W box	TTGACC	1927	6	+	Arabidopsis thaliana
283F_arrow	WRE3	CCACCT	1728	6	+	Pisum sativum
283F_arrow	Myb-binding site	CAACAG	780	6	-	Nicotiana tabacum
283F_arrow	I-box	gGATAAGGTG	278	9	+	Zea mays	part of a light responsive element
283F_arrow	I-box	gGATAAGGTG	290	9	-	Zea mays	part of a light responsive element
283F_arrow	I-box	ccttatcct	292	9	+	Arabidopsis thaliana	part of a light responsive element
283F_arrow	I-box	gGATAAGGTG	508	9	-	Zea mays	part of a light responsive element
283F_arrow	I-box	cCATATCCAAT	510	10	+	Flaveria trinervia	part of a light responsive element
283F_arrow	Unnamed__6	taTAAATATct	165	10	-	Zea mays
283F_arrow	Unnamed__6	taTAAATATct	406	10	-	Zea mays
283F_arrow	LTR	CCGAAA	1011	6	+	Hordeum vulgare	cis-acting element involved in low-temperature responsiveness
283F_arrow	GATA-motif	AAGGATAAGG	292	9	-	Solanum tuberosum	part of a light responsive element
283F_arrow	GATA-motif	GATAGGA	1242	7	-	Arabidopsis thaliana	part of a light responsive element
283F_arrow	Box 4	ATTAAT	624	6	+	Petroselinum crispum	part of a conserved DNA module involved in light responsiveness
283F_arrow	Box 4	ATTAAT	1418	6	-	Petroselinum crispum	part of a conserved DNA module involved in light responsiveness
283F_arrow	Box 4	ATTAAT	1651	6	-	Petroselinum crispum	part of a conserved DNA module involved in light responsiveness
283F_arrow	G-Box	CACGTG	1252	6	-	Pisum sativum	cis-acting regulatory element involved in light responsiveness
283F_arrow	TCA	TCATCTTCAT	609	9	-	Pisum sativum
283F_arrow	TCA	TCATCTTCAT	1191	9	-	Pisum sativum
283F_arrow	STRE	AGGGG	283	5	+	Arabidopsis thaliana
283F_arrow	STRE	AGGGG	929	5	-	Arabidopsis thaliana
283F_arrow	MYB	TAACCA	26	6	+	Arabidopsis thaliana
283F_arrow	MYB	TAACCA	192	6	+	Arabidopsis thaliana
283F_arrow	MYB	CAACCA	329	6	+	Arabidopsis thaliana
283F_arrow	MYB	CAACCA	548	6	+	Arabidopsis thaliana
283F_arrow	MYB	CAACCA	552	6	+	Arabidopsis thaliana
283F_arrow	MYB	CAACAG	780	6	-	Arabidopsis thaliana
283F_arrow	MYB	TAACCA	1656	6	+	Arabidopsis thaliana
283F_arrow	MYB	TAACCA	1710	6	+	Arabidopsis thaliana
283F_arrow	MYB	TAACCA	1758	6	+	Arabidopsis thaliana
283F_arrow	MYB	CAACCA	1868	6	+	Arabidopsis thaliana
283F_arrow	ABRE3a	TACGTG	893	6	-	Zea mays
283F_arrow	ABRE	ACGTG	893	5	-	Arabidopsis thaliana	cis-acting element involved in the abscisic acid responsiveness
283F_arrow	ABRE	ACGTG	899	5	-	Arabidopsis thaliana	cis-acting element involved in the abscisic acid responsiveness
283F_arrow	ABRE	GCCGCGTGGC	1250	9	-	Oryza sativa	cis-acting element involved in the abscisic acid responsiveness
283F_arrow	ABRE	CACGTG	1252	6	-	Arabidopsis thaliana	cis-acting element involved in the abscisic acid responsiveness
283F_arrow	ABRE	ACGTG	1253	5	+	Arabidopsis thaliana	cis-acting element involved in the abscisic acid responsiveness
283F_arrow	Box II	CCACGTGGC	1250	9	-	Petroselinum crispum	part of a light responsive element
283F_arrow	Box II	CCACGTGGC	1251	9	+	Petroselinum crispum	part of a light responsive element
283F_arrow	chs-CMA1a	TTACTTAA	666	8	+	Daucus carota	part of a light responsive element
296F_arrow	ERE	ATTTCATA	41	8	+	Nicotiana glutinos
296F_arrow	ERE	ATTTCATA	104	8	+	Nicotiana glutinos
296F_arrow	chs-CMA1a	TTACTTAA	1133	8	+	Daucus carota	part of a light responsive element
296F_arrow	chs-CMA1a	TTACTTAA	1780	8	-	Daucus carota	part of a light responsive element
296F_arrow	TCT-motif	TCTTAC	474	6	-	Arabidopsis thaliana	part of a light responsive element
296F_arrow	TCT-motif	TCTTAC	707	6	+	Arabidopsis thaliana	part of a light responsive element
296F_arrow	TCT-motif	TCTTAC	1081	6	-	Arabidopsis thaliana	part of a light responsive element
296F_arrow	TCT-motif	TCTTAC	1949	6	+	Arabidopsis thaliana	part of a light responsive element
296F_arrow	HD-Zip 3	GTAAT(G/C)ATTAC	46	9.5	+	Arabidopsis thaliana	protein binding site
296F_arrow	MYB	CAACAG	1691	6	+	Arabidopsis thaliana
296F_arrow	TCCC-motif	TCTCCCT	122	7	+	Spinacia oleracea	part of a light responsive element
296F_arrow	TCA	TCATCTTCAT	761	9	-	Pisum sativum
296F_arrow	GATA-motif	AAGGATAAGG	1561	9	+	Solanum tuberosum	part of a light responsive element
296F_arrow	LTR	CCGAAA	93	6	-	Hordeum vulgare	cis-acting element involved in low-temperature responsiveness
296F_arrow	LTR	CCGAAA	565	6	-	Hordeum vulgare	cis-acting element involved in low-temperature responsiveness
296F_arrow	LTR	CCGAAA	691	6	-	Hordeum vulgare	cis-acting element involved in low-temperature responsiveness
296F_arrow	LTR	CCGAAA	1017	6	-	Hordeum vulgare	cis-acting element involved in low-temperature responsiveness
296F_arrow	AE-box	AGAAACTT	480	8	+	Arabidopsis thaliana	part of a module for light response
296F_arrow	AE-box	AGAAACTT	1094	8	-	Arabidopsis thaliana	part of a module for light response
296F_arrow	Myb-binding site	CAACAG	1691	6	+	Nicotiana tabacum
296F_arrow	ARE	AAACCA	617	6	+	Zea mays	cis-acting regulatory element essential for the anaerobic induction
296F_arrow	ARE	AAACCA	622	6	+	Zea mays	cis-acting regulatory element essential for the anaerobic induction
296F_arrow	ARE	AAACCA	881	6	+	Zea mays	cis-acting regulatory element essential for the anaerobic induction
296F_arrow	ARE	AAACCA	1822	6	+	Zea mays	cis-acting regulatory element essential for the anaerobic induction
296F_arrow	WUN-motif	CCATTTCAA	733	9	+	Nicotiana glutinosa
296F_arrow	P-box	CCTTTTG	1899	7	+	Oryza sativa	gibberellin-responsive element
296F_arrow	circadian	CAAAGATATC	1378	9	-	Lycopersicon esculentum	cis-acting regulatory element involved in circadian control
296F_arrow	GT1-motif	GGTTAA	1061	6	+	Arabidopsis thaliana	light responsive element
296F_arrow	GT1-motif	GGTTAAT	1635	7	+	Avena sativa	light responsive element
296F_arrow	LAMP-element	CTTTATCA	1491	8	-	Pisum sativum	part of a light responsive element
296F_arrow	O2-site	GATGACATGG	1620	9	-	Zea mays	cis-acting regulatory element involved in zein metabolism regulation
296F_arrow	AAGAA-motif	GAAAGAA	1043	7	+	Avena sativa
296F_arrow	AAGAA-motif	GAAAGAA	1187	7	+	Avena sativa
296F_arrow	AAGAA-motif	GAAAGAA	1191	7	+	Avena sativa
296F_arrow	Unnamed__4	CTCC	5	4	-	Petroselinum hortense
296F_arrow	Unnamed__4	CTCC	123	4	+	Petroselinum hortense
296F_arrow	Unnamed__4	CTCC	129	4	+	Petroselinum hortense
296F_arrow	Unnamed__4	CTCC	279	4	-	Petroselinum hortense
296F_arrow	Unnamed__4	CTCC	284	4	-	Petroselinum hortense
296F_arrow	Unnamed__4	CTCC	498	4	-	Petroselinum hortense
296F_arrow	Unnamed__4	CTCC	1455	4	+	Petroselinum hortense
296F_arrow	Unnamed__4	CTCC	1462	4	+	Petroselinum hortense
296F_arrow	Unnamed__4	CTCC	1646	4	+	Petroselinum hortense
296F_arrow	Unnamed__4	CTCC	1842	4	+	Petroselinum hortense
296F_arrow	Unnamed__4	CTCC	1917	4	-	Petroselinum hortense
296F_arrow	Unnamed__4	CTCC	1998	4	+	Petroselinum hortense
296F_arrow	TATC-box	TATCCCA	1741	7	-	Oryza sativa	cis-acting element involved in gibberellin-responsiveness
296F_arrow	MYC	CATTTG	720	6	-	Arabidopsis thaliana
296F_arrow	MYC	CATTTG	739	6	-	Arabidopsis thaliana
296F_arrow	MYC	CAATTG	1178	6	-	Arabidopsis thaliana
296F_arrow	TC-rich repeats	GTTTTCTTAC	703	9	+	Nicotiana tabacum	cis-acting element involved in defense and stress responsiveness
296F_arrow	TATA-box	TATAAAA	530	7	-	Pisum sativum	core promoter element around -30 of transcription start
296F_arrow	TATA-box	TATAAA	531	6	-	Helianthus annuus	core promoter element around -30 of transcription start
296F_arrow	TATA-box	TATAA	532	5	-	Arabidopsis thaliana	core promoter element around -30 of transcription start
296F_arrow	TATA-box	TATA	533	4	+	Arabidopsis thaliana	core promoter element around -30 of transcription start
296F_arrow	TATA-box	ATTATA	677	6	+	Brassica napus	core promoter element around -30 of transcription start
296F_arrow	TATA-box	TATAA	678	5	-	Arabidopsis thaliana	core promoter element around -30 of transcription start
296F_arrow	TATA-box	TATA	679	4	+	Arabidopsis thaliana	core promoter element around -30 of transcription start
296F_arrow	TATA-box	TATACA	849	6	-	Helianthus annuus	core promoter element around -30 of transcription start
296F_arrow	TATA-box	TATA	851	4	+	Arabidopsis thaliana	core promoter element around -30 of transcription start
296F_arrow	TATA-box	TATA	1068	4	-	Arabidopsis thaliana	core promoter element around -30 of transcription start
296F_arrow	TATA-box	ATATAA	1073	6	+	Brassica oleracea	core promoter element around -30 of transcription start
296F_arrow	TATA-box	TATA	1074	4	-	Arabidopsis thaliana	core promoter element around -30 of transcription start
296F_arrow	TATA-box	ATTATA	1246	6	+	Brassica napus	core promoter element around -30 of transcription start
296F_arrow	TATA-box	TATAA	1247	5	-	Arabidopsis thaliana	core promoter element around -30 of transcription start
296F_arrow	TATA-box	TATA	1248	4	-	Arabidopsis thaliana	core promoter element around -30 of transcription start
296F_arrow	TATA-box	ATTATA	1275	6	+	Brassica napus	core promoter element around -30 of transcription start
296F_arrow	TATA-box	TATAA	1276	5	-	Arabidopsis thaliana	core promoter element around -30 of transcription start
296F_arrow	TATA-box	TATA	1277	4	-	Arabidopsis thaliana	core promoter element around -30 of transcription start
296F_arrow	TATA-box	ATTATA	1376	6	+	Brassica napus	core promoter element around -30 of transcription start
296F_arrow	TATA-box	TATAA	1377	5	-	Arabidopsis thaliana	core promoter element around -30 of transcription start
296F_arrow	TATA-box	TATA	1378	4	-	Arabidopsis thaliana	core promoter element around -30 of transcription start
296F_arrow	TATA-box	ATATAA	1471	6	+	Brassica oleracea	core promoter element around -30 of transcription start
296F_arrow	TATA-box	TATA	1472	4	-	Arabidopsis thaliana	core promoter element around -30 of transcription start
296F_arrow	TATA-box	ccTATAAAaa	1964	9	+	Arabidopsis thaliana	core promoter element around -30 of transcription start
296F_arrow	TATA-box	TATA	1966	4	-	Arabidopsis thaliana	core promoter element around -30 of transcription start
296F_arrow		motif_sequence	5	4	-	organism	short_function
296F_arrow		motif_sequence	121	4	+	organism	short_function
296F_arrow		motif_sequence	127	4	+	organism	short_function
296F_arrow		motif_sequence	179	4	-	organism	short_function
296F_arrow		motif_sequence	192	4	+	organism	short_function
296F_arrow		motif_sequence	290	4	-	organism	short_function
296F_arrow		motif_sequence	315	4	+	organism	short_function
296F_arrow		motif_sequence	320	4	+	organism	short_function
296F_arrow		motif_sequence	757	4	-	organism	short_function
296F_arrow		motif_sequence	766	4	-	organism	short_function
296F_arrow		motif_sequence	1338	4	-	organism	short_function
296F_arrow		motif_sequence	1706	4	+	organism	short_function
296F_arrow		motif_sequence	1768	4	+	organism	short_function
296F_arrow		motif_sequence	1803	4	-	organism	short_function
296F_arrow	DRE core	GCCGAC	113	6	-	Arabidopsis thaliana
296F_arrow	CAAT-box	CAAT	19	4	-	Nicotiana glutinosa
296F_arrow	CAAT-box	CAAAT	141	5	+	Pisum sativum	common cis-acting element in promoter and enhancer regions
296F_arrow	CAAT-box	CAAT	227	4	-	Nicotiana glutinosa
296F_arrow	CAAT-box	CAAT	294	4	-	Nicotiana glutinosa
296F_arrow	CAAT-box	CAAT	460	4	+	Nicotiana glutinosa
296F_arrow	CAAT-box	CAAT	471	4	-	Nicotiana glutinosa
296F_arrow	CAAT-box	CAAT	494	4	+	Nicotiana glutinosa
296F_arrow	CAAT-box	CAAT	557	4	+	Nicotiana glutinosa
296F_arrow	CAAT-box	CAAT	641	4	-	Nicotiana glutinosa
296F_arrow	CAAT-box	CAAAT	720	5	+	Pisum sativum	common cis-acting element in promoter and enhancer regions
296F_arrow	CAAT-box	CAAAT	739	5	+	Pisum sativum	common cis-acting element in promoter and enhancer regions
296F_arrow	CAAT-box	CAAT	855	4	+	Nicotiana glutinosa
296F_arrow	CAAT-box	CAAT	1178	4	+	Nicotiana glutinosa
296F_arrow	CAAT-box	CAAT	1180	4	-	Nicotiana glutinosa
296F_arrow	CAAT-box	CAAT	1212	4	-	Nicotiana glutinosa
296F_arrow	CAAT-box	CAAAT	1272	5	+	Pisum sativum	common cis-acting element in promoter and enhancer regions
296F_arrow	CAAT-box	CAAT	1374	4	+	Nicotiana glutinosa
296F_arrow	CAAT-box	TGCCAAC	1430	7	+	Petunia hybrida	common cis-acting element in promoter and enhancer regions
296F_arrow	CAAT-box	CAAT	1436	4	+	Nicotiana glutinosa
296F_arrow	CAAT-box	CAAT	1515	4	+	Nicotiana glutinosa
296F_arrow	CAAT-box	CAAT	1552	4	+	Nicotiana glutinosa
296F_arrow	CAAT-box	CAAT	1584	4	+	Nicotiana glutinosa
296F_arrow	CAAT-box	CAAT	1679	4	-	Nicotiana glutinosa
296F_arrow	CAAT-box	CAAAT	1773	5	+	Pisum sativum	common cis-acting element in promoter and enhancer regions
296F_arrow	CAAT-box	CAAT	1867	4	+	Nicotiana glutinosa
296F_arrow	CAAT-box	CAAT	1942	4	+	Nicotiana glutinosa
296F_arrow	CAAT-box	CAAT	1946	4	+	Nicotiana glutinosa
296F_arrow	TCA-element	CCATCTTTTT	1278	9	-	Nicotiana tabacum	cis-acting element involved in salicylic acid responsiveness
29F_arrow	CAAT-box	CAAT	165	4	+	Nicotiana glutinosa
29F_arrow	CAAT-box	CAAT	183	4	+	Nicotiana glutinosa
29F_arrow	CAAT-box	CAAT	233	4	-	Nicotiana glutinosa
29F_arrow	CAAT-box	CAAAT	297	5	-	Pisum sativum	common cis-acting element in promoter and enhancer regions
29F_arrow	CAAT-box	CAAT	389	4	-	Nicotiana glutinosa
29F_arrow	CAAT-box	CAAAT	423	5	+	Pisum sativum	common cis-acting element in promoter and enhancer regions
29F_arrow	CAAT-box	CAAAT	562	5	-	Pisum sativum	common cis-acting element in promoter and enhancer regions
29F_arrow	CAAT-box	CAAT	568	4	-	Nicotiana glutinosa
29F_arrow	CAAT-box	CAAT	580	4	-	Nicotiana glutinosa
29F_arrow	CAAT-box	CAAT	596	4	+	Nicotiana glutinosa
29F_arrow	CAAT-box	CAAAT	635	5	+	Pisum sativum	common cis-acting element in promoter and enhancer regions
29F_arrow	CAAT-box	CAAAT	638	5	-	Pisum sativum	common cis-acting element in promoter and enhancer regions
29F_arrow	CAAT-box	CCAAT	737	5	-	Arabidopsis thaliana	common cis-acting element in promoter and enhancer regions
29F_arrow	CAAT-box	CAAT	743	4	+	Nicotiana glutinosa
29F_arrow	CAAT-box	CCAAT	807	5	+	Arabidopsis thaliana	common cis-acting element in promoter and enhancer regions
29F_arrow	CAAT-box	CAAT	808	4	+	Nicotiana glutinosa
29F_arrow	CAAT-box	CCAAT	828	5	-	Arabidopsis thaliana	common cis-acting element in promoter and enhancer regions
29F_arrow	CAAT-box	CAAT	845	4	-	Nicotiana glutinosa
29F_arrow	CAAT-box	CAAT	898	4	+	Nicotiana glutinosa
29F_arrow	CAAT-box	CCAAT	900	5	-	Arabidopsis thaliana	common cis-acting element in promoter and enhancer regions
29F_arrow	CAAT-box	CAAT	924	4	+	Nicotiana glutinosa
29F_arrow	CAAT-box	CAAAT	1089	5	+	Pisum sativum	common cis-acting element in promoter and enhancer regions
29F_arrow	CAAT-box	CCAAT	1227	5	-	Arabidopsis thaliana	common cis-acting element in promoter and enhancer regions
29F_arrow	CAAT-box	TGCAAATCT	1242	9	-	Brassica juncea	common cis-acting element in promoter and enhancer regions
29F_arrow	CAAT-box	CAAAT	1244	5	-	Pisum sativum	common cis-acting element in promoter and enhancer regions
29F_arrow	CAAT-box	CAAAT	1250	5	-	Pisum sativum	common cis-acting element in promoter and enhancer regions
29F_arrow	CAAT-box	CAAT	1367	4	+	Nicotiana glutinosa
29F_arrow	CAAT-box	CAAT	1386	4	-	Nicotiana glutinosa
29F_arrow	CAAT-box	CAAT	1430	4	+	Nicotiana glutinosa
29F_arrow	CAAT-box	CAAAT	1600	5	+	Pisum sativum	common cis-acting element in promoter and enhancer regions
29F_arrow	CAAT-box	CAAAT	1640	5	+	Pisum sativum	common cis-acting element in promoter and enhancer regions
29F_arrow	CAAT-box	CAAAT	1654	5	-	Pisum sativum	common cis-acting element in promoter and enhancer regions
29F_arrow	CAAT-box	CAAT	1766	4	+	Nicotiana glutinosa
29F_arrow	CAAT-box	CAAT	1771	4	+	Nicotiana glutinosa
29F_arrow	CAAT-box	CAAT	1854	4	+	Nicotiana glutinosa
29F_arrow	CAAT-box	CAAAT	1870	5	-	Pisum sativum	common cis-acting element in promoter and enhancer regions
29F_arrow	CAAT-box	CAAT	1941	4	-	Nicotiana glutinosa
29F_arrow	CAAT-box	CAAAT	1975	5	-	Pisum sativum	common cis-acting element in promoter and enhancer regions
29F_arrow	GARE-motif	TCTGTTG	1752	7	+	Brassica oleracea	gibberellin-responsive element
29F_arrow	GARE-motif	TCTGTTG	1819	7	+	Brassica oleracea	gibberellin-responsive element
29F_arrow		motif_sequence	47	4	+	organism	short_function
29F_arrow		motif_sequence	381	4	+	organism	short_function
29F_arrow		motif_sequence	458	4	+	organism	short_function
29F_arrow		motif_sequence	705	4	-	organism	short_function
29F_arrow		motif_sequence	1206	4	+	organism	short_function
29F_arrow		motif_sequence	1230	4	-	organism	short_function
29F_arrow		motif_sequence	1476	4	+	organism	short_function
29F_arrow		motif_sequence	1635	4	+	organism	short_function
29F_arrow		motif_sequence	1731	4	-	organism	short_function
29F_arrow		motif_sequence	1965	4	-	organism	short_function
29F_arrow	AT~TATA-box	TATATA	445	6	+	Arabidopsis thaliana
29F_arrow	AT~TATA-box	TATATA	453	6	+	Arabidopsis thaliana
29F_arrow	AT~TATA-box	TATATA	684	6	+	Arabidopsis thaliana
29F_arrow	AT~TATA-box	TATATA	686	6	+	Arabidopsis thaliana
29F_arrow	MYB-like sequence	TAACCA	1280	6	+	Arabidopsis thaliana
29F_arrow	MRE	AACCTAA	1063	7	+	Petroselinum crispum	MYB binding site involved in light responsiveness
29F_arrow	as-1	TGACG	391	5	+	Arabidopsis thaliana
29F_arrow	as-1	TGACG	1423	5	-	Arabidopsis thaliana
29F_arrow	TATC-box	TATCCCA	110	7	-	Oryza sativa	cis-acting element involved in gibberellin-responsiveness
29F_arrow	MYC	CATTTG	296	6	+	Arabidopsis thaliana
29F_arrow	MYC	CAATTG	898	6	+	Arabidopsis thaliana
29F_arrow	MYC	CATGTG	914	6	-	Arabidopsis thaliana
29F_arrow	MYC	CATTTG	1249	6	+	Arabidopsis thaliana
29F_arrow	MYC	CATTTG	1653	6	+	Arabidopsis thaliana
29F_arrow	MYC	CATGTG	1914	6	-	Arabidopsis thaliana
29F_arrow	TATA-box	ATATAA	430	6	+	Brassica oleracea	core promoter element around -30 of transcription start
29F_arrow	TATA-box	TATA	431	4	+	Arabidopsis thaliana	core promoter element around -30 of transcription start
29F_arrow	TATA-box	ATTATA	443	6	+	Brassica napus	core promoter element around -30 of transcription start
29F_arrow	TATA-box	TATATAA	444	7	-	Arabidopsis thaliana	core promoter element around -30 of transcription start
29F_arrow	TATA-box	TATATA	445	6	+	Arabidopsis thaliana	core promoter element around -30 of transcription start
29F_arrow	TATA-box	ATATAA	446	6	+	Brassica oleracea	core promoter element around -30 of transcription start
29F_arrow	TATA-box	TATA	447	4	+	Arabidopsis thaliana	core promoter element around -30 of transcription start
29F_arrow	TATA-box	ATATAT	452	6	+	Brassica napus	core promoter element around -30 of transcription start
29F_arrow	TATA-box	TATATA	453	6	+	Arabidopsis thaliana	core promoter element around -30 of transcription start
29F_arrow	TATA-box	ATATAT	454	6	+	Brassica napus	core promoter element around -30 of transcription start
29F_arrow	TATA-box	TATA	455	4	+	Arabidopsis thaliana	core promoter element around -30 of transcription start
29F_arrow	TATA-box	ATTATA	472	6	+	Brassica napus	core promoter element around -30 of transcription start
29F_arrow	TATA-box	TATAA	473	5	-	Arabidopsis thaliana	core promoter element around -30 of transcription start
29F_arrow	TATA-box	TATA	474	4	+	Arabidopsis thaliana	core promoter element around -30 of transcription start
29F_arrow	TATA-box	ATTATA	492	6	+	Brassica napus	core promoter element around -30 of transcription start
29F_arrow	TATA-box	TATAA	493	5	-	Arabidopsis thaliana	core promoter element around -30 of transcription start
29F_arrow	TATA-box	TATA	494	4	+	Arabidopsis thaliana	core promoter element around -30 of transcription start
29F_arrow	TATA-box	TATA	532	4	+	Arabidopsis thaliana	core promoter element around -30 of transcription start
29F_arrow	TATA-box	TATATAA	683	7	-	Arabidopsis thaliana	core promoter element around -30 of transcription start
29F_arrow	TATA-box	TATATA	684	6	+	Arabidopsis thaliana	core promoter element around -30 of transcription start
29F_arrow	TATA-box	ATATAT	685	6	+	Brassica napus	core promoter element around -30 of transcription start
29F_arrow	TATA-box	TATATA	686	6	+	Arabidopsis thaliana	core promoter element around -30 of transcription start
29F_arrow	TATA-box	TATA	688	4	+	Arabidopsis thaliana	core promoter element around -30 of transcription start
29F_arrow	TATA-box	ccTATAAAaa	732	9	-	Arabidopsis thaliana	core promoter element around -30 of transcription start
29F_arrow	TATA-box	taTATAAAtc	812	9	-	Arabidopsis thaliana	core promoter element around -30 of transcription start
29F_arrow	TATA-box	TATA	892	4	+	Arabidopsis thaliana	core promoter element around -30 of transcription start
29F_arrow	TATA-box	TATA	1005	4	-	Arabidopsis thaliana	core promoter element around -30 of transcription start
29F_arrow	TATA-box	TATA	1036	4	-	Arabidopsis thaliana	core promoter element around -30 of transcription start
29F_arrow	TATA-box	TATACA	1293	6	-	Helianthus annuus	core promoter element around -30 of transcription start
29F_arrow	TATA-box	TATA	1295	4	-	Arabidopsis thaliana	core promoter element around -30 of transcription start
29F_arrow	TATA-box	TACAAAA	1303	7	-	Oryza sativa	core promoter element around -30 of transcription start
29F_arrow	TATA-box	TATA	1354	4	-	Arabidopsis thaliana	core promoter element around -30 of transcription start
29F_arrow	TATA-box	ATATAA	1377	6	+	Brassica oleracea	core promoter element around -30 of transcription start
29F_arrow	TATA-box	TATA	1378	4	-	Arabidopsis thaliana	core promoter element around -30 of transcription start
29F_arrow	TATA-box	TATAAAT	1391	7	-	Brassica juncea	core promoter element around -30 of transcription start
29F_arrow	TATA-box	TATAAA	1392	6	-	Helianthus annuus	core promoter element around -30 of transcription start
29F_arrow	TATA-box	TATAA	1393	5	-	Arabidopsis thaliana	core promoter element around -30 of transcription start
29F_arrow	TATA-box	TATA	1394	4	-	Arabidopsis thaliana	core promoter element around -30 of transcription start
29F_arrow	TATA-box	TACAAAA	1540	7	-	Oryza sativa	core promoter element around -30 of transcription start
29F_arrow	TATA-box	TATTTAAA	1626	8	+	Arabidopsis thaliana	core promoter element around -30 of transcription start
29F_arrow	TATA-box	ATTATA	1735	6	+	Brassica napus	core promoter element around -30 of transcription start
29F_arrow	TATA-box	TATAA	1736	5	-	Arabidopsis thaliana	core promoter element around -30 of transcription start
29F_arrow	TATA-box	TATA	1737	4	-	Arabidopsis thaliana	core promoter element around -30 of transcription start
29F_arrow	TATA-box	ATATAA	1856	6	+	Brassica oleracea	core promoter element around -30 of transcription start
29F_arrow	TATA-box	TATA	1857	4	-	Arabidopsis thaliana	core promoter element around -30 of transcription start
29F_arrow	TATA-box	ATATAT	1937	6	-	Brassica napus	core promoter element around -30 of transcription start
29F_arrow	TATA-box	TATA	1938	4	-	Arabidopsis thaliana	core promoter element around -30 of transcription start
29F_arrow	TATA-box	TATACA	1943	6	-	Helianthus annuus	core promoter element around -30 of transcription start
29F_arrow	TATA-box	TATA	1945	4	-	Arabidopsis thaliana	core promoter element around -30 of transcription start
29F_arrow	TATA-box	ATTATA	1986	6	+	Brassica napus	core promoter element around -30 of transcription start
29F_arrow	TATA-box	TATAA	1987	5	-	Arabidopsis thaliana	core promoter element around -30 of transcription start
29F_arrow	TATA-box	TATA	1988	4	-	Arabidopsis thaliana	core promoter element around -30 of transcription start
29F_arrow	CGTCA-motif	CGTCA	391	5	-	Hordeum vulgare	cis-acting regulatory element involved in the MeJA-responsiveness
29F_arrow	CGTCA-motif	CGTCA	1423	5	+	Hordeum vulgare	cis-acting regulatory element involved in the MeJA-responsiveness
29F_arrow	G-box	CACGAC	1144	6	+	Zea mays	cis-acting regulatory element involved in light responsiveness
29F_arrow	G-box	CACGTC	1421	6	+	Zea mays	cis-acting regulatory element involved in light responsiveness
29F_arrow	GT1-motif	GGTTAA	1279	6	-	Arabidopsis thaliana	light responsive element
29F_arrow	LAMP-element	CTTTATCA	588	8	+	Pisum sativum	part of a light responsive element
29F_arrow	O2-site	GTTGACGTGA	1420	9	-	Zea mays	cis-acting regulatory element involved in zein metabolism regulation
29F_arrow	AAGAA-motif	GAAAGAA	50	7	-	Avena sativa
29F_arrow	AAGAA-motif	GAAAGAA	1056	7	-	Avena sativa
29F_arrow	AAGAA-motif	GAAAGAA	1129	7	-	Avena sativa
29F_arrow	Unnamed__4	CTCC	22	4	-	Petroselinum hortense
29F_arrow	Unnamed__4	CTCC	40	4	-	Petroselinum hortense
29F_arrow	Unnamed__4	CTCC	849	4	+	Petroselinum hortense
29F_arrow	Unnamed__4	CTCC	1208	4	+	Petroselinum hortense
29F_arrow	Unnamed__4	CTCC	1230	4	-	Petroselinum hortense
29F_arrow	Unnamed__4	CTCC	1535	4	-	Petroselinum hortense
29F_arrow	Unnamed__4	CTCC	1580	4	+	Petroselinum hortense
29F_arrow	Unnamed__4	CTCC	1609	4	+	Petroselinum hortense
29F_arrow	Unnamed__4	CTCC	1760	4	-	Petroselinum hortense
29F_arrow	TGACG-motif	TGACG	391	5	+	Hordeum vulgare	cis-acting regulatory element involved in the MeJA-responsiveness
29F_arrow	TGACG-motif	TGACG	1423	5	-	Hordeum vulgare	cis-acting regulatory element involved in the MeJA-responsiveness
29F_arrow	Myb-binding site	CAACAG	1753	6	-	Nicotiana tabacum
29F_arrow	Myb-binding site	CAACAG	1820	6	-	Nicotiana tabacum
29F_arrow	W box	TTGACC	740	6	-	Arabidopsis thaliana
29F_arrow	ARE	AAACCA	716	6	-	Zea mays	cis-acting regulatory element essential for the anaerobic induction
29F_arrow	LTR	CCGAAA	53	6	-	Hordeum vulgare	cis-acting element involved in low-temperature responsiveness
29F_arrow	I-box	cCATATCCAAT	1227	10	-	Flaveria trinervia	part of a light responsive element
29F_arrow	AE-box	AGAAACTT	1613	8	-	Arabidopsis thaliana	part of a module for light response
29F_arrow	Unnamed__6	taTAAATATct	447	10	+	Zea mays
29F_arrow	MYB	TAACCA	1280	6	+	Arabidopsis thaliana
29F_arrow	MYB	CAACAG	1753	6	-	Arabidopsis thaliana
29F_arrow	MYB	CAACAG	1820	6	-	Arabidopsis thaliana
29F_arrow	Box 4	ATTAAT	426	6	+	Petroselinum crispum	part of a conserved DNA module involved in light responsiveness
29F_arrow	Box 4	ATTAAT	650	6	+	Petroselinum crispum	part of a conserved DNA module involved in light responsiveness
29F_arrow	Box 4	ATTAAT	882	6	+	Petroselinum crispum	part of a conserved DNA module involved in light responsiveness
29F_arrow	Box 4	ATTAAT	1643	6	-	Petroselinum crispum	part of a conserved DNA module involved in light responsiveness
29F_arrow	TCA	TCATCTTCAT	65	9	+	Pisum sativum
29F_arrow	TCA	TCATCTTCAT	68	9	+	Pisum sativum
29F_arrow	TCA	TCATCTTCAT	86	9	+	Pisum sativum
29F_arrow	TCA	TCATCTTCAT	89	9	+	Pisum sativum
29F_arrow	ERE	ATTTTAAA	959	8	+	Nicotiana glutinos
29F_arrow	ERE	ATTTCATA	1466	8	+	Nicotiana glutinos
29F_arrow	ABRE	ACGTG	1421	5	-	Arabidopsis thaliana	cis-acting element involved in the abscisic acid responsiveness
2F_arrow	TCT-motif	TCTTAC	100	6	+	Arabidopsis thaliana	part of a light responsive element
2F_arrow	TCA	TCATCTTCAT	35	10	+	Pisum sativum
2F_arrow	TCCC-motif	TCTCCCT	126	7	-	Spinacia oleracea	part of a light responsive element
2F_arrow	Box 4	ATTAAT	736	6	+	Petroselinum crispum	part of a conserved DNA module involved in light responsiveness
2F_arrow	Box 4	ATTAAT	1337	6	-	Petroselinum crispum	part of a conserved DNA module involved in light responsiveness
2F_arrow	Box 4	ATTAAT	1439	6	-	Petroselinum crispum	part of a conserved DNA module involved in light responsiveness
2F_arrow	CARE	CAACTCAC	184	8	-	Oryza sativa
2F_arrow	MYB	CAACCA	982	6	-	Arabidopsis thaliana
2F_arrow	MYB	TAACCA	1517	6	+	Arabidopsis thaliana
2F_arrow	MYB	TAACCA	1639	6	+	Arabidopsis thaliana
2F_arrow	MYB	CAACAG	1894	6	+	Arabidopsis thaliana
2F_arrow	AE-box	AGAAACAA	769	8	-	Arabidopsis thaliana	part of a module for light response
2F_arrow	AE-box	AGAAACTT	892	8	+	Arabidopsis thaliana	part of a module for light response
2F_arrow	LTR	CCGAAA	1541	6	-	Hordeum vulgare	cis-acting element involved in low-temperature responsiveness
2F_arrow	circadian	CAAAGATATC	1479	9	+	Lycopersicon esculentum	cis-acting regulatory element involved in circadian control
2F_arrow	Myb-binding site	CAACAG	1894	6	+	Nicotiana tabacum
2F_arrow	ARE	AAACCA	48	6	-	Zea mays	cis-acting regulatory element essential for the anaerobic induction
2F_arrow	ARE	AAACCA	201	6	-	Zea mays	cis-acting regulatory element essential for the anaerobic induction
2F_arrow	ARE	AAACCA	717	6	+	Zea mays	cis-acting regulatory element essential for the anaerobic induction
2F_arrow	ARE	AAACCA	1497	6	-	Zea mays	cis-acting regulatory element essential for the anaerobic induction
2F_arrow	ARE	AAACCA	1600	6	+	Zea mays	cis-acting regulatory element essential for the anaerobic induction
2F_arrow	ARE	AAACCA	1784	6	+	Zea mays	cis-acting regulatory element essential for the anaerobic induction
2F_arrow	ARE	AAACCA	1976	6	+	Zea mays	cis-acting regulatory element essential for the anaerobic induction
2F_arrow	W box	TTGACC	414	6	-	Arabidopsis thaliana
2F_arrow	TGACG-motif	TGACG	168	5	-	Hordeum vulgare	cis-acting regulatory element involved in the MeJA-responsiveness
2F_arrow	Unnamed__4	CTCC	11	4	-	Petroselinum hortense
2F_arrow	Unnamed__4	CTCC	128	4	-	Petroselinum hortense
2F_arrow	Unnamed__4	CTCC	300	4	+	Petroselinum hortense
2F_arrow	Unnamed__4	CTCC	571	4	-	Petroselinum hortense
2F_arrow	Unnamed__4	CTCC	818	4	-	Petroselinum hortense
2F_arrow	Unnamed__4	CTCC	1189	4	+	Petroselinum hortense
2F_arrow	Unnamed__4	CTCC	1545	4	-	Petroselinum hortense
2F_arrow	Unnamed__4	CTCC	1565	4	+	Petroselinum hortense
2F_arrow	Unnamed__4	CTCC	1649	4	+	Petroselinum hortense
2F_arrow	AAGAA-motif	GAAAGAA	776	7	-	Avena sativa
2F_arrow	CAT-box	GCCACT	327	6	+	Arabidopsis thaliana	cis-acting regulatory element related to meristem expression
2F_arrow	CGTCA-motif	CGTCA	168	5	+	Hordeum vulgare	cis-acting regulatory element involved in the MeJA-responsiveness
2F_arrow	TATA	TATAAAAT	1042	8	+	Arabidopsis thaliana
2F_arrow	TATA	TATAAAAT	1050	8	-	Arabidopsis thaliana
2F_arrow	TATA-box	ATATAT	732	6	+	Brassica napus	core promoter element around -30 of transcription start
2F_arrow	TATA-box	TATA	733	4	+	Arabidopsis thaliana	core promoter element around -30 of transcription start
2F_arrow	TATA-box	TATA	1035	4	-	Arabidopsis thaliana	core promoter element around -30 of transcription start
2F_arrow	TATA-box	ATATAA	1041	6	+	Brassica oleracea	core promoter element around -30 of transcription start
2F_arrow	TATA-box	TATA	1042	4	-	Arabidopsis thaliana	core promoter element around -30 of transcription start
2F_arrow	TATA-box	TATAAAA	1051	7	-	Pisum sativum	core promoter element around -30 of transcription start
2F_arrow	TATA-box	TATAAA	1052	6	-	Helianthus annuus	core promoter element around -30 of transcription start
2F_arrow	TATA-box	TATAA	1053	5	-	Arabidopsis thaliana	core promoter element around -30 of transcription start
2F_arrow	TATA-box	TATA	1054	4	-	Arabidopsis thaliana	core promoter element around -30 of transcription start
2F_arrow	TATA-box	ATATAA	1223	6	+	Brassica oleracea	core promoter element around -30 of transcription start
2F_arrow	TATA-box	TATA	1224	4	-	Arabidopsis thaliana	core promoter element around -30 of transcription start
2F_arrow	TATA-box	ATATAA	1267	6	+	Brassica oleracea	core promoter element around -30 of transcription start
2F_arrow	TATA-box	TATA	1268	4	-	Arabidopsis thaliana	core promoter element around -30 of transcription start
2F_arrow	TATA-box	TATAAAT	1293	7	-	Brassica juncea	core promoter element around -30 of transcription start
2F_arrow	TATA-box	TATAAA	1294	6	-	Helianthus annuus	core promoter element around -30 of transcription start
2F_arrow	TATA-box	TATAA	1295	5	-	Arabidopsis thaliana	core promoter element around -30 of transcription start
2F_arrow	TATA-box	TATA	1296	4	-	Arabidopsis thaliana	core promoter element around -30 of transcription start
2F_arrow	TATA-box	TATA	1410	4	-	Arabidopsis thaliana	core promoter element around -30 of transcription start
2F_arrow	TATA-box	ATTATA	1446	6	+	Brassica napus	core promoter element around -30 of transcription start
2F_arrow	TATA-box	TATAA	1447	5	-	Arabidopsis thaliana	core promoter element around -30 of transcription start
2F_arrow	TATA-box	TATA	1448	4	-	Arabidopsis thaliana	core promoter element around -30 of transcription start
2F_arrow	TATA-box	TATA	1515	4	-	Arabidopsis thaliana	core promoter element around -30 of transcription start
2F_arrow	TATA-box	TACAAAA	1534	7	+	Oryza sativa	core promoter element around -30 of transcription start
2F_arrow	MYC	CATTTG	24	6	-	Arabidopsis thaliana
2F_arrow	MYC	CATTTG	1203	6	-	Arabidopsis thaliana
2F_arrow	MYC	CAATTG	1769	6	-	Arabidopsis thaliana
2F_arrow	as-1	TGACG	168	5	-	Arabidopsis thaliana
2F_arrow	DRE core	GCCGAC	1777	6	+	Arabidopsis thaliana
2F_arrow	ATCT-motif	AATCTAATCC	989	9	-	Pisum sativum	part of a conserved DNA module involved in light responsiveness
2F_arrow	MYB-like sequence	TAACCA	1517	6	+	Arabidopsis thaliana
2F_arrow	MYB-like sequence	TAACCA	1639	6	+	Arabidopsis thaliana
2F_arrow		motif_sequence	37	4	+	organism	short_function
2F_arrow		motif_sequence	55	4	+	organism	short_function
2F_arrow		motif_sequence	66	4	-	organism	short_function
2F_arrow		motif_sequence	122	4	-	organism	short_function
2F_arrow		motif_sequence	294	4	+	organism	short_function
2F_arrow		motif_sequence	371	4	+	organism	short_function
2F_arrow		motif_sequence	389	4	+	organism	short_function
2F_arrow		motif_sequence	514	4	-	organism	short_function
2F_arrow		motif_sequence	1244	4	-	organism	short_function
2F_arrow		motif_sequence	1279	4	-	organism	short_function
2F_arrow		motif_sequence	1711	4	+	organism	short_function
2F_arrow		motif_sequence	1718	4	-	organism	short_function
2F_arrow		motif_sequence	1908	4	+	organism	short_function
2F_arrow	Gap-box	CAAATGAA(A/G)A	24	9.5	+	Arabidopsis thaliana	part of a light responsive element
2F_arrow	TCA-element	CCATCTTTTT	1861	9	+	Nicotiana tabacum	cis-acting element involved in salicylic acid responsiveness
2F_arrow	CAAT-box	CAAAT	24	5	+	Pisum sativum	common cis-acting element in promoter and enhancer regions
2F_arrow	CAAT-box	CAAT	105	4	+	Nicotiana glutinosa
2F_arrow	CAAT-box	CAAT	147	4	+	Nicotiana glutinosa
2F_arrow	CAAT-box	CAAT	179	4	-	Nicotiana glutinosa
2F_arrow	CAAT-box	CAAT	397	4	+	Nicotiana glutinosa
2F_arrow	CAAT-box	CAAT	403	4	+	Nicotiana glutinosa
2F_arrow	CAAT-box	CAAT	420	4	+	Nicotiana glutinosa
2F_arrow	CAAT-box	CAAAT	456	5	+	Pisum sativum	common cis-acting element in promoter and enhancer regions
2F_arrow	CAAT-box	CAAT	511	4	-	Nicotiana glutinosa
2F_arrow	CAAT-box	CAAAT	553	5	+	Pisum sativum	common cis-acting element in promoter and enhancer regions
2F_arrow	CAAT-box	CAAT	604	4	-	Nicotiana glutinosa
2F_arrow	CAAT-box	CAAAT	751	5	-	Pisum sativum	common cis-acting element in promoter and enhancer regions
2F_arrow	CAAT-box	CCAAT	764	5	+	Arabidopsis thaliana	common cis-acting element in promoter and enhancer regions
2F_arrow	CAAT-box	CAAT	765	4	+	Nicotiana glutinosa
2F_arrow	CAAT-box	CAAAT	767	5	-	Pisum sativum	common cis-acting element in promoter and enhancer regions
2F_arrow	CAAT-box	CAAT	814	4	+	Nicotiana glutinosa
2F_arrow	CAAT-box	CAAAT	826	5	+	Pisum sativum	common cis-acting element in promoter and enhancer regions
2F_arrow	CAAT-box	CAAAT	1016	5	+	Pisum sativum	common cis-acting element in promoter and enhancer regions
2F_arrow	CAAT-box	CAAAT	1028	5	+	Pisum sativum	common cis-acting element in promoter and enhancer regions
2F_arrow	CAAT-box	CAAAT	1111	5	-	Pisum sativum	common cis-acting element in promoter and enhancer regions
2F_arrow	CAAT-box	CAAT	1159	4	-	Nicotiana glutinosa
2F_arrow	CAAT-box	CAAAT	1194	5	+	Pisum sativum	common cis-acting element in promoter and enhancer regions
2F_arrow	CAAT-box	CAAT	1197	4	-	Nicotiana glutinosa
2F_arrow	CAAT-box	CAAAT	1203	5	+	Pisum sativum	common cis-acting element in promoter and enhancer regions
2F_arrow	CAAT-box	CAAT	1233	4	+	Nicotiana glutinosa
2F_arrow	CAAT-box	CAAT	1241	4	-	Nicotiana glutinosa
2F_arrow	CAAT-box	CAAT	1265	4	+	Nicotiana glutinosa
2F_arrow	CAAT-box	CAAT	1275	4	+	Nicotiana glutinosa
2F_arrow	CAAT-box	CAAT	1333	4	+	Nicotiana glutinosa
2F_arrow	CAAT-box	CAAT	1341	4	-	Nicotiana glutinosa
2F_arrow	CAAT-box	CAAT	1347	4	+	Nicotiana glutinosa
2F_arrow	CAAT-box	CAAT	1362	4	-	Nicotiana glutinosa
2F_arrow	CAAT-box	CAAT	1388	4	+	Nicotiana glutinosa
2F_arrow	CAAT-box	TGCCAAC	1394	7	+	Petunia hybrida	common cis-acting element in promoter and enhancer regions
2F_arrow	CAAT-box	CAAAT	1436	5	+	Pisum sativum	common cis-acting element in promoter and enhancer regions
2F_arrow	CAAT-box	CAAT	1465	4	+	Nicotiana glutinosa
2F_arrow	CAAT-box	CAAT	1473	4	+	Nicotiana glutinosa
2F_arrow	CAAT-box	CAAT	1531	4	+	Nicotiana glutinosa
2F_arrow	CAAT-box	CAAT	1617	4	-	Nicotiana glutinosa
2F_arrow	CAAT-box	CAAAT	1630	5	+	Pisum sativum	common cis-acting element in promoter and enhancer regions
2F_arrow	CAAT-box	CAAAT	1633	5	-	Pisum sativum	common cis-acting element in promoter and enhancer regions
2F_arrow	CAAT-box	CAAT	1654	4	+	Nicotiana glutinosa
2F_arrow	CAAT-box	CAAAT	1656	5	-	Pisum sativum	common cis-acting element in promoter and enhancer regions
2F_arrow	CAAT-box	CAAT	1730	4	+	Nicotiana glutinosa
2F_arrow	CAAT-box	CCAAT	1768	5	+	Arabidopsis thaliana	common cis-acting element in promoter and enhancer regions
2F_arrow	CAAT-box	CAAT	1769	4	+	Nicotiana glutinosa
2F_arrow	CAAT-box	CCAAT	1771	5	-	Arabidopsis thaliana	common cis-acting element in promoter and enhancer regions
2F_arrow	CAAT-box	CAAT	1879	4	-	Nicotiana glutinosa
2F_arrow	CAAT-box	CAAT	1888	4	+	Nicotiana glutinosa
2F_arrow	CAAT-box	CAAT	1922	4	+	Nicotiana glutinosa
2F_arrow	CAAT-box	CCAAT	1940	5	+	Arabidopsis thaliana	common cis-acting element in promoter and enhancer regions
2F_arrow	CAAT-box	CAAT	1941	4	+	Nicotiana glutinosa
2F_arrow	CAAT-box	CAAT	1989	4	+	Nicotiana glutinosa
2F_arrow	Unnamed__1	CGTGG	980	5	+	Zea mays
342F_arrow	LTR	CCGAAA	332	6	-	Hordeum vulgare	cis-acting element involved in low-temperature responsiveness
342F_arrow	GATA-motif	AAGATAAGATT	792	10	+	Arabidopsis thaliana	part of a light responsive element
342F_arrow	AE-box	AGAAACAA	1954	8	+	Arabidopsis thaliana	part of a module for light response
342F_arrow	I-box	AGATAAGG	22	8	+	Triticum aestivum	part of a light responsive element
342F_arrow	I-box	gGATAAGGTG	1318	9	+	Zea mays	part of a light responsive element
342F_arrow	I-box	cCATATCCAAT	1351	10	-	Flaveria trinervia	part of a light responsive element
342F_arrow	AuxRR-core	GGTCCAT	149	7	+	Nicotiana tabacum	cis-acting regulatory element involved in auxin responsiveness
342F_arrow	ARE	AAACCA	354	6	-	Zea mays	cis-acting regulatory element essential for the anaerobic induction
342F_arrow	ARE	AAACCA	851	6	+	Zea mays	cis-acting regulatory element essential for the anaerobic induction
342F_arrow	W box	TTGACC	35	6	+	Arabidopsis thaliana
342F_arrow	W box	TTGACC	1591	6	-	Arabidopsis thaliana
342F_arrow	CCGTCC-box	CCGTCC	1129	6	+	Petroselinum hortense
342F_arrow	Myb-binding site	CAACAG	387	6	-	Nicotiana tabacum
342F_arrow	Myb-binding site	CAACAG	945	6	+	Nicotiana tabacum
342F_arrow	WUN-motif	AAATTTCCT	27	9	-	Brassica oleracea	wound-responsive element
342F_arrow	WUN-motif	AAATTACT	408	8	+	Nicotiana glutinosa
342F_arrow	WUN-motif	TTATTACAT	829	9	-	Nicotiana glutinosa
342F_arrow	WUN-motif	AAATTACT	1976	8	+	Nicotiana glutinosa
342F_arrow	circadian	CAAAGATATC	981	9	+	Lycopersicon esculentum	cis-acting regulatory element involved in circadian control
342F_arrow	3-AF1 binding site	TAAGAGAGGAA	88	10	-	Solanum tuberosum	light responsive element
342F_arrow	Myc	TCTCTTA	1487	7	-	Arabidopsis thaliana
342F_arrow	TCT-motif	TCTTAC	585	6	-	Arabidopsis thaliana	part of a light responsive element
342F_arrow	ABRE	ACGTG	1446	5	-	Arabidopsis thaliana	cis-acting element involved in the abscisic acid responsiveness
342F_arrow	ABRE	ACGTG	1506	5	+	Arabidopsis thaliana	cis-acting element involved in the abscisic acid responsiveness
342F_arrow	ABRE	ACGTG	1561	5	-	Arabidopsis thaliana	cis-acting element involved in the abscisic acid responsiveness
342F_arrow	HD-Zip 3	GTAAT(G/C)ATTAC	1220	9.5	-	Arabidopsis thaliana	protein binding site
342F_arrow	CCGTCC motif	CCGTCC	1129	6	+	Nicotiana tabacum
342F_arrow	CARE	CAACTCAC	708	8	+	Oryza sativa
342F_arrow	MYB	CAACAG	387	6	-	Arabidopsis thaliana
342F_arrow	MYB	CAACAG	945	6	+	Arabidopsis thaliana
342F_arrow	MYB	CAACCA	1156	6	-	Arabidopsis thaliana
342F_arrow	TGA-element	AACGAC	1478	6	+	Brassica oleracea	auxin-responsive element
342F_arrow	Box 4	ATTAAT	627	6	+	Petroselinum crispum	part of a conserved DNA module involved in light responsiveness
342F_arrow	Box 4	ATTAAT	800	6	+	Petroselinum crispum	part of a conserved DNA module involved in light responsiveness
342F_arrow	Box 4	ATTAAT	962	6	+	Petroselinum crispum	part of a conserved DNA module involved in light responsiveness
342F_arrow	Box 4	ATTAAT	966	6	+	Petroselinum crispum	part of a conserved DNA module involved in light responsiveness
342F_arrow	Box 4	ATTAAT	1118	6	-	Petroselinum crispum	part of a conserved DNA module involved in light responsiveness
342F_arrow	Box 4	ATTAAT	1750	6	-	Petroselinum crispum	part of a conserved DNA module involved in light responsiveness
342F_arrow	TCA	TCATCTTCAT	107	9	+	Pisum sativum
342F_arrow	G-Box	CACGTT	1446	6	+	Pisum sativum	cis-acting regulatory element involved in light responsiveness
342F_arrow	G-Box	CACGTT	1505	6	-	Pisum sativum	cis-acting regulatory element involved in light responsiveness
342F_arrow		motif_sequence	161	4	-	organism	short_function
342F_arrow		motif_sequence	240	4	+	organism	short_function
342F_arrow		motif_sequence	261	4	-	organism	short_function
342F_arrow		motif_sequence	274	4	-	organism	short_function
342F_arrow		motif_sequence	644	4	-	organism	short_function
342F_arrow		motif_sequence	739	4	+	organism	short_function
342F_arrow		motif_sequence	808	4	-	organism	short_function
342F_arrow		motif_sequence	890	4	+	organism	short_function
342F_arrow		motif_sequence	1141	4	-	organism	short_function
342F_arrow		motif_sequence	1150	4	+	organism	short_function
342F_arrow		motif_sequence	1186	4	+	organism	short_function
342F_arrow		motif_sequence	1259	4	+	organism	short_function
342F_arrow		motif_sequence	1439	4	+	organism	short_function
342F_arrow		motif_sequence	1576	4	-	organism	short_function
342F_arrow		motif_sequence	1947	4	-	organism	short_function
342F_arrow	AT~TATA-box	TATATA	1007	6	-	Arabidopsis thaliana
342F_arrow	AT~TATA-box	TATATA	1009	6	-	Arabidopsis thaliana
342F_arrow	AT~TATA-box	TATATA	1011	6	-	Arabidopsis thaliana
342F_arrow	AT~TATA-box	TATATA	1013	6	-	Arabidopsis thaliana
342F_arrow	AT~TATA-box	TATATA	1059	6	-	Arabidopsis thaliana
342F_arrow	AT~TATA-box	TATATA	1061	6	-	Arabidopsis thaliana
342F_arrow	AT~TATA-box	TATATA	1063	6	-	Arabidopsis thaliana
342F_arrow	AT~TATA-box	TATATAAA	1380	8	-	Arabidopsis thaliana
342F_arrow	AT~TATA-box	TATATA	1382	6	-	Arabidopsis thaliana
342F_arrow	AT~TATA-box	TATATA	1706	6	-	Arabidopsis thaliana
342F_arrow	AT~TATA-box	TATATA	1762	6	-	Arabidopsis thaliana
342F_arrow	AT~TATA-box	TATATA	1890	6	-	Arabidopsis thaliana
342F_arrow	AT~TATA-box	TATATA	1992	6	-	Arabidopsis thaliana
342F_arrow	Unnamed__1	CGTGG	753	5	+	Zea mays
342F_arrow	CAAT-box	CCAAT	77	5	-	Arabidopsis thaliana	common cis-acting element in promoter and enhancer regions
342F_arrow	CAAT-box	CAAAT	125	5	-	Pisum sativum	common cis-acting element in promoter and enhancer regions
342F_arrow	CAAT-box	CAAT	154	4	-	Nicotiana glutinosa
342F_arrow	CAAT-box	CAAT	403	4	-	Nicotiana glutinosa
342F_arrow	CAAT-box	CAAT	422	4	-	Nicotiana glutinosa
342F_arrow	CAAT-box	CAAAT	450	5	+	Pisum sativum	common cis-acting element in promoter and enhancer regions
342F_arrow	CAAT-box	CAAT	471	4	-	Nicotiana glutinosa
342F_arrow	CAAT-box	CAAAT	495	5	-	Pisum sativum	common cis-acting element in promoter and enhancer regions
342F_arrow	CAAT-box	CAAT	698	4	+	Nicotiana glutinosa
342F_arrow	CAAT-box	CAAT	719	4	-	Nicotiana glutinosa
342F_arrow	CAAT-box	CAAT	744	4	+	Nicotiana glutinosa
342F_arrow	CAAT-box	CAAT	818	4	-	Nicotiana glutinosa
342F_arrow	CAAT-box	CAAT	842	4	-	Nicotiana glutinosa
342F_arrow	CAAT-box	CAAAT	872	5	+	Pisum sativum	common cis-acting element in promoter and enhancer regions
342F_arrow	CAAT-box	CAAAT	930	5	+	Pisum sativum	common cis-acting element in promoter and enhancer regions
342F_arrow	CAAT-box	CCAAT	1164	5	+	Arabidopsis thaliana	common cis-acting element in promoter and enhancer regions
342F_arrow	CAAT-box	CAAT	1165	4	+	Nicotiana glutinosa
342F_arrow	CAAT-box	CAAT	1264	4	+	Nicotiana glutinosa
342F_arrow	CAAT-box	CAAAT	1266	5	-	Pisum sativum	common cis-acting element in promoter and enhancer regions
342F_arrow	CAAT-box	CCAAT	1351	5	-	Arabidopsis thaliana	common cis-acting element in promoter and enhancer regions
342F_arrow	CAAT-box	CAAT	1391	4	+	Nicotiana glutinosa
342F_arrow	CAAT-box	CAAAT	1513	5	-	Pisum sativum	common cis-acting element in promoter and enhancer regions
342F_arrow	CAAT-box	CAAAT	1535	5	+	Pisum sativum	common cis-acting element in promoter and enhancer regions
342F_arrow	CAAT-box	CAAAT	1548	5	-	Pisum sativum	common cis-acting element in promoter and enhancer regions
342F_arrow	CAAT-box	CAAAT	1572	5	-	Pisum sativum	common cis-acting element in promoter and enhancer regions
342F_arrow	CAAT-box	CCAAT	1623	5	-	Arabidopsis thaliana	common cis-acting element in promoter and enhancer regions
342F_arrow	CAAT-box	CAAAT	1669	5	-	Pisum sativum	common cis-acting element in promoter and enhancer regions
342F_arrow	CAAT-box	CAAT	1715	4	+	Nicotiana glutinosa
342F_arrow	CAAT-box	CAAAT	1736	5	+	Pisum sativum	common cis-acting element in promoter and enhancer regions
342F_arrow	CAAT-box	CAAT	1776	4	+	Nicotiana glutinosa
342F_arrow	CAAT-box	CAAT	1789	4	-	Nicotiana glutinosa
342F_arrow	CAAT-box	CAAT	1804	4	+	Nicotiana glutinosa
342F_arrow	CAAT-box	CAAAT	1829	5	+	Pisum sativum	common cis-acting element in promoter and enhancer regions
342F_arrow	CAAT-box	CAAT	1926	4	+	Nicotiana glutinosa
342F_arrow	CAAT-box	CAAAT	1975	5	+	Pisum sativum	common cis-acting element in promoter and enhancer regions
342F_arrow	A-box	CCGTCC	1129	6	+	Petroselinum crispum	cis-acting regulatory element
342F_arrow	GARE-motif	TCTGTTG	945	7	-	Brassica oleracea	gibberellin-responsive element
342F_arrow	TCA-element	TCAGAAGAGG	1138	9	+	Brassica oleracea	cis-acting element involved in salicylic acid responsiveness
342F_arrow	TCA-element	CCATCTTTTT	1212	9	+	Nicotiana tabacum	cis-acting element involved in salicylic acid responsiveness
342F_arrow	Myb	CAACTG	234	6	-	Arabidopsis thaliana
342F_arrow	Myb	TAACTG	555	6	+	Arabidopsis thaliana
342F_arrow	Gap-box	CAAATGAA(A/G)A	120	9	-	Arabidopsis thaliana	part of a light responsive element
342F_arrow	Gap-box	CAAATGAA(A/G)A	872	9.5	+	Arabidopsis thaliana	part of a light responsive element
342F_arrow	Gap-box	CAAATGAA(A/G)A	930	9	+	Arabidopsis thaliana	part of a light responsive element
342F_arrow	G-box	CACGTC	1561	6	+	Zea mays	cis-acting regulatory element involved in light responsiveness
342F_arrow	O2-site	GATGA(C/T)(A/G)TG(A/G)	491	8	+	Zea mays	cis-acting regulatory element involved in zein metabolism regulation
342F_arrow	CAT-box	GCCACT	1613	6	-	Arabidopsis thaliana	cis-acting regulatory element related to meristem expression
342F_arrow	AAGAA-motif	GAAAGAA	589	7	+	Avena sativa
342F_arrow	AAGAA-motif	GAAAGAA	786	7	+	Avena sativa
342F_arrow	AAGAA-motif	GAAAGAA	790	7	+	Avena sativa
342F_arrow	AAGAA-motif	GAAAGAA	1517	7	+	Avena sativa
342F_arrow	Unnamed__4	CTCC	55	4	-	Petroselinum hortense
342F_arrow	Unnamed__4	CTCC	58	4	-	Petroselinum hortense
342F_arrow	Unnamed__4	CTCC	161	4	-	Petroselinum hortense
342F_arrow	Unnamed__4	CTCC	215	4	-	Petroselinum hortense
342F_arrow	Unnamed__4	CTCC	290	4	-	Petroselinum hortense
342F_arrow	Unnamed__4	CTCC	325	4	+	Petroselinum hortense
342F_arrow	Unnamed__4	CTCC	895	4	+	Petroselinum hortense
342F_arrow	Unnamed__4	CTCC	1152	4	+	Petroselinum hortense
342F_arrow	Unnamed__4	CTCC	1188	4	+	Petroselinum hortense
342F_arrow	Unnamed__4	CTCC	1361	4	-	Petroselinum hortense
342F_arrow	Unnamed__4	CTCC	1364	4	-	Petroselinum hortense
342F_arrow	Unnamed__4	CTCC	1441	4	+	Petroselinum hortense
342F_arrow	Unnamed__4	CTCC	1688	4	-	Petroselinum hortense
342F_arrow	MYC	CATTTG	124	6	+	Arabidopsis thaliana
342F_arrow	MYC	CATTTG	450	6	-	Arabidopsis thaliana
342F_arrow	MYC	CATTTG	872	6	-	Arabidopsis thaliana
342F_arrow	MYC	CATTTG	930	6	-	Arabidopsis thaliana
342F_arrow	MYC	CATTTG	1512	6	+	Arabidopsis thaliana
342F_arrow	MYC	CATTTG	1668	6	+	Arabidopsis thaliana
342F_arrow	MYC	CATTTG	1736	6	-	Arabidopsis thaliana
342F_arrow	MBS	CAACTG	234	6	-	Arabidopsis thaliana	MYB binding site involved in drought-inducibility
342F_arrow	TATA-box	TATAA	96	5	-	Arabidopsis thaliana	core promoter element around -30 of transcription start
342F_arrow	TATA-box	TATA	97	4	+	Arabidopsis thaliana	core promoter element around -30 of transcription start
342F_arrow	TATA-box	ATATAT	441	6	+	Brassica napus	core promoter element around -30 of transcription start
342F_arrow	TATA-box	TATA	442	4	+	Arabidopsis thaliana	core promoter element around -30 of transcription start
342F_arrow	TATA-box	TATA	537	4	+	Arabidopsis thaliana	core promoter element around -30 of transcription start
342F_arrow	TATA-box	ATTATA	631	6	+	Brassica napus	core promoter element around -30 of transcription start
342F_arrow	TATA-box	TATAA	632	5	-	Arabidopsis thaliana	core promoter element around -30 of transcription start
342F_arrow	TATA-box	TATA	633	4	+	Arabidopsis thaliana	core promoter element around -30 of transcription start
342F_arrow	TATA-box	ATATAT	682	6	+	Brassica napus	core promoter element around -30 of transcription start
342F_arrow	TATA-box	TATA	683	4	+	Arabidopsis thaliana	core promoter element around -30 of transcription start
342F_arrow	TATA-box	ATTATA	686	6	+	Brassica napus	core promoter element around -30 of transcription start
342F_arrow	TATA-box	TATAA	687	5	-	Arabidopsis thaliana	core promoter element around -30 of transcription start
342F_arrow	TATA-box	TATA	688	4	+	Arabidopsis thaliana	core promoter element around -30 of transcription start
342F_arrow	TATA-box	ATATAT	1006	6	-	Brassica napus	core promoter element around -30 of transcription start
342F_arrow	TATA-box	TATATA	1007	6	-	Arabidopsis thaliana	core promoter element around -30 of transcription start
342F_arrow	TATA-box	ATATAT	1008	6	-	Brassica napus	core promoter element around -30 of transcription start
342F_arrow	TATA-box	TATATA	1009	6	-	Arabidopsis thaliana	core promoter element around -30 of transcription start
342F_arrow	TATA-box	ATATAT	1010	6	-	Brassica napus	core promoter element around -30 of transcription start
342F_arrow	TATA-box	TATATA	1011	6	-	Arabidopsis thaliana	core promoter element around -30 of transcription start
342F_arrow	TATA-box	ATATAT	1012	6	-	Brassica napus	core promoter element around -30 of transcription start
342F_arrow	TATA-box	TATATA	1013	6	-	Arabidopsis thaliana	core promoter element around -30 of transcription start
342F_arrow	TATA-box	ATATAT	1014	6	-	Brassica napus	core promoter element around -30 of transcription start
342F_arrow	TATA-box	TATA	1015	4	-	Arabidopsis thaliana	core promoter element around -30 of transcription start
342F_arrow	TATA-box	ATTATA	1039	6	+	Brassica napus	core promoter element around -30 of transcription start
342F_arrow	TATA-box	TATAA	1040	5	-	Arabidopsis thaliana	core promoter element around -30 of transcription start
342F_arrow	TATA-box	TATA	1041	4	-	Arabidopsis thaliana	core promoter element around -30 of transcription start
342F_arrow	TATA-box	ATATAT	1058	6	-	Brassica napus	core promoter element around -30 of transcription start
342F_arrow	TATA-box	TATATA	1059	6	-	Arabidopsis thaliana	core promoter element around -30 of transcription start
342F_arrow	TATA-box	ATATAT	1060	6	-	Brassica napus	core promoter element around -30 of transcription start
342F_arrow	TATA-box	TATATA	1061	6	-	Arabidopsis thaliana	core promoter element around -30 of transcription start
342F_arrow	TATA-box	ATATAT	1062	6	-	Brassica napus	core promoter element around -30 of transcription start
342F_arrow	TATA-box	TATATA	1063	6	-	Arabidopsis thaliana	core promoter element around -30 of transcription start
342F_arrow	TATA-box	TATA	1065	4	-	Arabidopsis thaliana	core promoter element around -30 of transcription start
342F_arrow	TATA-box	TATAAAA	1379	7	-	Pisum sativum	core promoter element around -30 of transcription start
342F_arrow	TATA-box	TATAAA	1380	6	-	Helianthus annuus	core promoter element around -30 of transcription start
342F_arrow	TATA-box	TATATAA	1381	7	-	Arabidopsis thaliana	core promoter element around -30 of transcription start
342F_arrow	TATA-box	TATATA	1382	6	-	Arabidopsis thaliana	core promoter element around -30 of transcription start
342F_arrow	TATA-box	ATATAT	1383	6	-	Brassica napus	core promoter element around -30 of transcription start
342F_arrow	TATA-box	TATA	1384	4	-	Arabidopsis thaliana	core promoter element around -30 of transcription start
342F_arrow	TATA-box	TATA	1471	4	-	Arabidopsis thaliana	core promoter element around -30 of transcription start
342F_arrow	TATA-box	TATATAA	1705	7	-	Arabidopsis thaliana	core promoter element around -30 of transcription start
342F_arrow	TATA-box	TATATA	1706	6	-	Arabidopsis thaliana	core promoter element around -30 of transcription start
342F_arrow	TATA-box	ATATAT	1707	6	-	Brassica napus	core promoter element around -30 of transcription start
342F_arrow	TATA-box	TATA	1708	4	-	Arabidopsis thaliana	core promoter element around -30 of transcription start
342F_arrow	TATA-box	ATATAT	1761	6	-	Brassica napus	core promoter element around -30 of transcription start
342F_arrow	TATA-box	TATATA	1762	6	-	Arabidopsis thaliana	core promoter element around -30 of transcription start
342F_arrow	TATA-box	TATA	1764	4	-	Arabidopsis thaliana	core promoter element around -30 of transcription start
342F_arrow	TATA-box	TATA	1839	4	-	Arabidopsis thaliana	core promoter element around -30 of transcription start
342F_arrow	TATA-box	ATATAT	1889	6	-	Brassica napus	core promoter element around -30 of transcription start
342F_arrow	TATA-box	TATATA	1890	6	-	Arabidopsis thaliana	core promoter element around -30 of transcription start
342F_arrow	TATA-box	ATATAA	1891	6	+	Brassica oleracea	core promoter element around -30 of transcription start
342F_arrow	TATA-box	TATA	1892	4	-	Arabidopsis thaliana	core promoter element around -30 of transcription start
342F_arrow	TATA-box	ATATAT	1991	6	-	Brassica napus	core promoter element around -30 of transcription start
342F_arrow	TATA-box	TATATA	1992	6	-	Arabidopsis thaliana	core promoter element around -30 of transcription start
342F_arrow	TATA-box	ATATAA	1993	6	+	Brassica oleracea	core promoter element around -30 of transcription start
342F_arrow	TATA-box	TATA	1994	4	-	Arabidopsis thaliana	core promoter element around -30 of transcription start
342F_arrow	TATA	TATAAAAT	1378	8	-	Arabidopsis thaliana
3F_arrow	MYB	TAACCA	987	6	+	Arabidopsis thaliana
3F_arrow	MYB	TAACCA	1251	6	-	Arabidopsis thaliana
3F_arrow	Box 4	ATTAAT	148	6	+	Petroselinum crispum	part of a conserved DNA module involved in light responsiveness
3F_arrow	Box 4	ATTAAT	959	6	+	Petroselinum crispum	part of a conserved DNA module involved in light responsiveness
3F_arrow	Box 4	ATTAAT	1090	6	-	Petroselinum crispum	part of a conserved DNA module involved in light responsiveness
3F_arrow	Box 4	ATTAAT	1527	6	-	Petroselinum crispum	part of a conserved DNA module involved in light responsiveness
3F_arrow	Box 4	ATTAAT	1544	6	-	Petroselinum crispum	part of a conserved DNA module involved in light responsiveness
3F_arrow	Box 4	ATTAAT	1652	6	-	Petroselinum crispum	part of a conserved DNA module involved in light responsiveness
3F_arrow	Box 4	ATTAAT	1801	6	-	Petroselinum crispum	part of a conserved DNA module involved in light responsiveness
3F_arrow	Box 4	ATTAAT	1963	6	-	Petroselinum crispum	part of a conserved DNA module involved in light responsiveness
3F_arrow	STRE	AGGGG	396	5	+	Arabidopsis thaliana
3F_arrow	ERE	ATTTTAAA	953	8	-	Nicotiana glutinos
3F_arrow	ERE	ATTTTAAA	1552	8	-	Nicotiana glutinos
3F_arrow	ERE	ATTTTAAA	1661	8	+	Nicotiana glutinos
3F_arrow	ERE	ATTTTAAA	1663	8	-	Nicotiana glutinos
3F_arrow	ERE	ATTTTAAA	1692	8	-	Nicotiana glutinos
3F_arrow	ERE	ATTTTAAA	1791	8	-	Nicotiana glutinos
3F_arrow	Myc	TCTCTTA	514	7	-	Arabidopsis thaliana
3F_arrow	TCT-motif	TCTTAC	424	6	+	Arabidopsis thaliana	part of a light responsive element
3F_arrow	AuxRR-core	GGTCCAT	332	7	+	Nicotiana tabacum	cis-acting regulatory element involved in auxin responsiveness
3F_arrow	ATC-motif	AGTAATCT	1237	8	+	Spinacia oleracea	part of a conserved DNA module involved in light responsiveness
3F_arrow	ARE	AAACCA	941	6	-	Zea mays	cis-acting regulatory element essential for the anaerobic induction
3F_arrow	WUN-motif	TTATTACAT	281	9	+	Nicotiana glutinosa
3F_arrow	WUN-motif	AAATTACTA	1576	9	-	Nicotiana glutinosa
3F_arrow	WUN-motif	AAATTACT	1577	8	-	Nicotiana glutinosa
3F_arrow	Box III	atCATTTTCACt	1191	11	-	Pisum sativum	protein binding site
3F_arrow	GATA-motif	GATAGGA	1150	7	-	Arabidopsis thaliana	part of a light responsive element
3F_arrow	GATA-motif	AAGATAAGATT	1900	10	+	Arabidopsis thaliana	part of a light responsive element
3F_arrow	Unnamed__6	taTAAATATct	20	10	-	Zea mays
3F_arrow	Unnamed__6	taTAAATATct	1556	10	-	Zea mays
3F_arrow	AAAC-motif	CAATCAAAACCT	428	11	-	Spinacia oleracea	light responsive element
3F_arrow	TATC-box	TATCCCA	1864	7	+	Oryza sativa	cis-acting element involved in gibberellin-responsiveness
3F_arrow	TATC-box	TATCCCA	1881	7	-	Oryza sativa	cis-acting element involved in gibberellin-responsiveness
3F_arrow	Unnamed__2	AACCTAACCT	1841	9	+	Petroselinum hortense
3F_arrow	MYC	CATGTG	614	6	-	Arabidopsis thaliana
3F_arrow	TATA	TATAAAAT	1383	8	+	Arabidopsis thaliana
3F_arrow	TATA	TATAAAAT	1508	8	+	Arabidopsis thaliana
3F_arrow	TATA-box	ATATAT	8	6	+	Brassica napus	core promoter element around -30 of transcription start
3F_arrow	TATA-box	TATATA	9	6	+	Arabidopsis thaliana	core promoter element around -30 of transcription start
3F_arrow	TATA-box	ATATAT	10	6	+	Brassica napus	core promoter element around -30 of transcription start
3F_arrow	TATA-box	TATA	11	4	+	Arabidopsis thaliana	core promoter element around -30 of transcription start
3F_arrow	TATA-box	taTATAAAtc	23	9	-	Arabidopsis thaliana	core promoter element around -30 of transcription start
3F_arrow	TATA-box	TATAAAT	24	7	-	Brassica juncea	core promoter element around -30 of transcription start
3F_arrow	TATA-box	TATAAA	25	6	-	Helianthus annuus	core promoter element around -30 of transcription start
3F_arrow	TATA-box	TATATAA	26	7	-	Arabidopsis thaliana	core promoter element around -30 of transcription start
3F_arrow	TATA-box	TATATA	27	6	+	Arabidopsis thaliana	core promoter element around -30 of transcription start
3F_arrow	TATA-box	ATATAT	28	6	+	Brassica napus	core promoter element around -30 of transcription start
3F_arrow	TATA-box	TATATA	29	6	+	Arabidopsis thaliana	core promoter element around -30 of transcription start
3F_arrow	TATA-box	ATATAT	30	6	+	Brassica napus	core promoter element around -30 of transcription start
3F_arrow	TATA-box	TATATA	31	6	+	Arabidopsis thaliana	core promoter element around -30 of transcription start
3F_arrow	TATA-box	ATATAT	32	6	+	Brassica napus	core promoter element around -30 of transcription start
3F_arrow	TATA-box	TATA	33	4	+	Arabidopsis thaliana	core promoter element around -30 of transcription start
3F_arrow	TATA-box	ATATAT	41	6	+	Brassica napus	core promoter element around -30 of transcription start
3F_arrow	TATA-box	TATATA	42	6	+	Arabidopsis thaliana	core promoter element around -30 of transcription start
3F_arrow	TATA-box	ATATAT	43	6	+	Brassica napus	core promoter element around -30 of transcription start
3F_arrow	TATA-box	TATATA	44	6	+	Arabidopsis thaliana	core promoter element around -30 of transcription start
3F_arrow	TATA-box	ATATAT	45	6	+	Brassica napus	core promoter element around -30 of transcription start
3F_arrow	TATA-box	TATATA	46	6	+	Arabidopsis thaliana	core promoter element around -30 of transcription start
3F_arrow	TATA-box	ATATAT	47	6	+	Brassica napus	core promoter element around -30 of transcription start
3F_arrow	TATA-box	TATATA	48	6	+	Arabidopsis thaliana	core promoter element around -30 of transcription start
3F_arrow	TATA-box	ATATAT	49	6	+	Brassica napus	core promoter element around -30 of transcription start
3F_arrow	TATA-box	TATATA	50	6	+	Arabidopsis thaliana	core promoter element around -30 of transcription start
3F_arrow	TATA-box	ATATAT	51	6	+	Brassica napus	core promoter element around -30 of transcription start
3F_arrow	TATA-box	TATA	52	4	+	Arabidopsis thaliana	core promoter element around -30 of transcription start
3F_arrow	TATA-box	TATACA	56	6	-	Helianthus annuus	core promoter element around -30 of transcription start
3F_arrow	TATA-box	TATA	58	4	+	Arabidopsis thaliana	core promoter element around -30 of transcription start
3F_arrow	TATA-box	ATTATA	185	6	+	Brassica napus	core promoter element around -30 of transcription start
3F_arrow	TATA-box	TATAA	186	5	-	Arabidopsis thaliana	core promoter element around -30 of transcription start
3F_arrow	TATA-box	TATA	187	4	+	Arabidopsis thaliana	core promoter element around -30 of transcription start
3F_arrow	TATA-box	TATTTAAA	226	8	-	Arabidopsis thaliana	core promoter element around -30 of transcription start
3F_arrow	TATA-box	TATTTAAA	260	8	+	Arabidopsis thaliana	core promoter element around -30 of transcription start
3F_arrow	TATA-box	TATTTAAA	270	8	+	Arabidopsis thaliana	core promoter element around -30 of transcription start
3F_arrow	TATA-box	TATA	325	4	+	Arabidopsis thaliana	core promoter element around -30 of transcription start
3F_arrow	TATA-box	TATA	346	4	+	Arabidopsis thaliana	core promoter element around -30 of transcription start
3F_arrow	TATA-box	ATATAT	529	6	+	Brassica napus	core promoter element around -30 of transcription start
3F_arrow	TATA-box	TATATA	530	6	+	Arabidopsis thaliana	core promoter element around -30 of transcription start
3F_arrow	TATA-box	ATATAT	531	6	+	Brassica napus	core promoter element around -30 of transcription start
3F_arrow	TATA-box	TATA	532	4	+	Arabidopsis thaliana	core promoter element around -30 of transcription start
3F_arrow	TATA-box	ATATAT	549	6	+	Brassica napus	core promoter element around -30 of transcription start
3F_arrow	TATA-box	TATATA	550	6	+	Arabidopsis thaliana	core promoter element around -30 of transcription start
3F_arrow	TATA-box	TATA	552	4	+	Arabidopsis thaliana	core promoter element around -30 of transcription start
3F_arrow	TATA-box	TATATA	559	6	+	Arabidopsis thaliana	core promoter element around -30 of transcription start
3F_arrow	TATA-box	ATATAT	560	6	+	Brassica napus	core promoter element around -30 of transcription start
3F_arrow	TATA-box	TATATA	561	6	+	Arabidopsis thaliana	core promoter element around -30 of transcription start
3F_arrow	TATA-box	ATATAT	562	6	+	Brassica napus	core promoter element around -30 of transcription start
3F_arrow	TATA-box	TATA	563	4	+	Arabidopsis thaliana	core promoter element around -30 of transcription start
3F_arrow	TATA-box	ATATAT	571	6	+	Brassica napus	core promoter element around -30 of transcription start
3F_arrow	TATA-box	TATATA	572	6	+	Arabidopsis thaliana	core promoter element around -30 of transcription start
3F_arrow	TATA-box	ATATAT	573	6	+	Brassica napus	core promoter element around -30 of transcription start
3F_arrow	TATA-box	TATATA	574	6	+	Arabidopsis thaliana	core promoter element around -30 of transcription start
3F_arrow	TATA-box	ATATAT	575	6	+	Brassica napus	core promoter element around -30 of transcription start
3F_arrow	TATA-box	TATATA	576	6	+	Arabidopsis thaliana	core promoter element around -30 of transcription start
3F_arrow	TATA-box	ATATAT	577	6	+	Brassica napus	core promoter element around -30 of transcription start
3F_arrow	TATA-box	TATATA	578	6	+	Arabidopsis thaliana	core promoter element around -30 of transcription start
3F_arrow	TATA-box	ATATAT	579	6	+	Brassica napus	core promoter element around -30 of transcription start
3F_arrow	TATA-box	TATATA	580	6	+	Arabidopsis thaliana	core promoter element around -30 of transcription start
3F_arrow	TATA-box	ATATAT	581	6	+	Brassica napus	core promoter element around -30 of transcription start
3F_arrow	TATA-box	TATATA	582	6	+	Arabidopsis thaliana	core promoter element around -30 of transcription start
3F_arrow	TATA-box	ATATAT	583	6	+	Brassica napus	core promoter element around -30 of transcription start
3F_arrow	TATA-box	TATA	584	4	+	Arabidopsis thaliana	core promoter element around -30 of transcription start
3F_arrow	TATA-box	TATATTTATATTT	625	12	-	Avena sativa	core promoter element around -30 of transcription start
3F_arrow	TATA-box	ATATAT	627	6	+	Brassica napus	core promoter element around -30 of transcription start
3F_arrow	TATA-box	TATATA	628	6	+	Arabidopsis thaliana	core promoter element around -30 of transcription start
3F_arrow	TATA-box	ATATAT	629	6	+	Brassica napus	core promoter element around -30 of transcription start
3F_arrow	TATA-box	TATATA	630	6	+	Arabidopsis thaliana	core promoter element around -30 of transcription start
3F_arrow	TATA-box	ATATAT	631	6	+	Brassica napus	core promoter element around -30 of transcription start
3F_arrow	TATA-box	TATATA	632	6	+	Arabidopsis thaliana	core promoter element around -30 of transcription start
3F_arrow	TATA-box	ATATAT	633	6	+	Brassica napus	core promoter element around -30 of transcription start
3F_arrow	TATA-box	TATA	634	4	+	Arabidopsis thaliana	core promoter element around -30 of transcription start
3F_arrow	TATA-box	TATAAAA	672	7	-	Pisum sativum	core promoter element around -30 of transcription start
3F_arrow	TATA-box	TATAAA	673	6	-	Helianthus annuus	core promoter element around -30 of transcription start
3F_arrow	TATA-box	TATAA	674	5	-	Arabidopsis thaliana	core promoter element around -30 of transcription start
3F_arrow	TATA-box	TATA	675	4	+	Arabidopsis thaliana	core promoter element around -30 of transcription start
3F_arrow	TATA-box	TATAAAA	714	7	-	Pisum sativum	core promoter element around -30 of transcription start
3F_arrow	TATA-box	TATAAA	715	6	-	Helianthus annuus	core promoter element around -30 of transcription start
3F_arrow	TATA-box	TATAA	716	5	-	Arabidopsis thaliana	core promoter element around -30 of transcription start
3F_arrow	TATA-box	TATA	717	4	+	Arabidopsis thaliana	core promoter element around -30 of transcription start
3F_arrow	TATA-box	TACAAAA	808	7	-	Oryza sativa	core promoter element around -30 of transcription start
3F_arrow	TATA-box	TATA	830	4	+	Arabidopsis thaliana	core promoter element around -30 of transcription start
3F_arrow	TATA-box	TATAAAA	853	7	-	Pisum sativum	core promoter element around -30 of transcription start
3F_arrow	TATA-box	TATAAA	854	6	-	Helianthus annuus	core promoter element around -30 of transcription start
3F_arrow	TATA-box	TATATAA	855	7	-	Arabidopsis thaliana	core promoter element around -30 of transcription start
3F_arrow	TATA-box	TATATA	856	6	+	Arabidopsis thaliana	core promoter element around -30 of transcription start
3F_arrow	TATA-box	ATATAT	857	6	+	Brassica napus	core promoter element around -30 of transcription start
3F_arrow	TATA-box	TATATA	858	6	+	Arabidopsis thaliana	core promoter element around -30 of transcription start
3F_arrow	TATA-box	ATATAT	859	6	+	Brassica napus	core promoter element around -30 of transcription start
3F_arrow	TATA-box	TATA	860	4	+	Arabidopsis thaliana	core promoter element around -30 of transcription start
3F_arrow	TATA-box	TATATTTATATTT	962	12	+	Avena sativa	core promoter element around -30 of transcription start
3F_arrow	TATA-box	TATAAATA	964	8	-	Daucus carota	core promoter element around -30 of transcription start
3F_arrow	TATA-box	TATAAAT	965	7	-	Brassica juncea	core promoter element around -30 of transcription start
3F_arrow	TATA-box	TATAAA	966	6	-	Helianthus annuus	core promoter element around -30 of transcription start
3F_arrow	TATA-box	TATAA	967	5	-	Arabidopsis thaliana	core promoter element around -30 of transcription start
3F_arrow	TATA-box	TATATTTATATTT	968	12	+	Avena sativa	core promoter element around -30 of transcription start
3F_arrow	TATA-box	TATTTAAA	970	8	+	Arabidopsis thaliana	core promoter element around -30 of transcription start
3F_arrow	TATA-box	ATATAT	1024	6	-	Brassica napus	core promoter element around -30 of transcription start
3F_arrow	TATA-box	TATATA	1025	6	-	Arabidopsis thaliana	core promoter element around -30 of transcription start
3F_arrow	TATA-box	TATA	1027	4	-	Arabidopsis thaliana	core promoter element around -30 of transcription start
3F_arrow	TATA-box	ATATAT	1032	6	-	Brassica napus	core promoter element around -30 of transcription start
3F_arrow	TATA-box	TATATA	1033	6	-	Arabidopsis thaliana	core promoter element around -30 of transcription start
3F_arrow	TATA-box	ATATAT	1034	6	-	Brassica napus	core promoter element around -30 of transcription start
3F_arrow	TATA-box	TATATA	1035	6	-	Arabidopsis thaliana	core promoter element around -30 of transcription start
3F_arrow	TATA-box	TATA	1037	4	-	Arabidopsis thaliana	core promoter element around -30 of transcription start
3F_arrow	TATA-box	ATATAT	1056	6	-	Brassica napus	core promoter element around -30 of transcription start
3F_arrow	TATA-box	TATATA	1057	6	-	Arabidopsis thaliana	core promoter element around -30 of transcription start
3F_arrow	TATA-box	ATATAT	1058	6	-	Brassica napus	core promoter element around -30 of transcription start
3F_arrow	TATA-box	TATATA	1059	6	-	Arabidopsis thaliana	core promoter element around -30 of transcription start
3F_arrow	TATA-box	TATA	1061	4	-	Arabidopsis thaliana	core promoter element around -30 of transcription start
3F_arrow	TATA-box	TATA	1085	4	-	Arabidopsis thaliana	core promoter element around -30 of transcription start
3F_arrow	TATA-box	TACAAAA	1134	7	+	Oryza sativa	core promoter element around -30 of transcription start
3F_arrow	TATA-box	ATATAT	1320	6	-	Brassica napus	core promoter element around -30 of transcription start
3F_arrow	TATA-box	TATATA	1321	6	-	Arabidopsis thaliana	core promoter element around -30 of transcription start
3F_arrow	TATA-box	ATATAA	1322	6	+	Brassica oleracea	core promoter element around -30 of transcription start
3F_arrow	TATA-box	TATA	1323	4	-	Arabidopsis thaliana	core promoter element around -30 of transcription start
3F_arrow	TATA-box	ATTATA	1381	6	+	Brassica napus	core promoter element around -30 of transcription start
3F_arrow	TATA-box	TATAA	1382	5	-	Arabidopsis thaliana	core promoter element around -30 of transcription start
3F_arrow	TATA-box	TATA	1383	4	-	Arabidopsis thaliana	core promoter element around -30 of transcription start
3F_arrow	TATA-box	ATATAA	1389	6	+	Brassica oleracea	core promoter element around -30 of transcription start
3F_arrow	TATA-box	TATA	1390	4	-	Arabidopsis thaliana	core promoter element around -30 of transcription start
3F_arrow	TATA-box	ATATAT	1402	6	-	Brassica napus	core promoter element around -30 of transcription start
3F_arrow	TATA-box	TATA	1403	4	-	Arabidopsis thaliana	core promoter element around -30 of transcription start
3F_arrow	TATA-box	ATATAT	1434	6	-	Brassica napus	core promoter element around -30 of transcription start
3F_arrow	TATA-box	TATATA	1435	6	-	Arabidopsis thaliana	core promoter element around -30 of transcription start
3F_arrow	TATA-box	ATATAA	1436	6	+	Brassica oleracea	core promoter element around -30 of transcription start
3F_arrow	TATA-box	TATA	1437	4	-	Arabidopsis thaliana	core promoter element around -30 of transcription start
3F_arrow	TATA-box	ATTATA	1452	6	+	Brassica napus	core promoter element around -30 of transcription start
3F_arrow	TATA-box	TATAA	1453	5	-	Arabidopsis thaliana	core promoter element around -30 of transcription start
3F_arrow	TATA-box	TATA	1454	4	-	Arabidopsis thaliana	core promoter element around -30 of transcription start
3F_arrow	TATA-box	ATATAA	1507	6	+	Brassica oleracea	core promoter element around -30 of transcription start
3F_arrow	TATA-box	TATA	1508	4	-	Arabidopsis thaliana	core promoter element around -30 of transcription start
3F_arrow	TATA-box	ATATAA	1536	6	+	Brassica oleracea	core promoter element around -30 of transcription start
3F_arrow	TATA-box	TATA	1537	4	-	Arabidopsis thaliana	core promoter element around -30 of transcription start
3F_arrow	TATA-box	taTATAAAtc	1559	9	-	Arabidopsis thaliana	core promoter element around -30 of transcription start
3F_arrow	TATA-box	TATAAAT	1560	7	-	Brassica juncea	core promoter element around -30 of transcription start
3F_arrow	TATA-box	TATAAA	1561	6	-	Helianthus annuus	core promoter element around -30 of transcription start
3F_arrow	TATA-box	TATATAA	1562	7	-	Arabidopsis thaliana	core promoter element around -30 of transcription start
3F_arrow	TATA-box	TATATA	1563	6	-	Arabidopsis thaliana	core promoter element around -30 of transcription start
3F_arrow	TATA-box	ATATAA	1564	6	+	Brassica oleracea	core promoter element around -30 of transcription start
3F_arrow	TATA-box	TATA	1565	4	-	Arabidopsis thaliana	core promoter element around -30 of transcription start
3F_arrow	TATA-box	TACAAAA	1571	7	-	Oryza sativa	core promoter element around -30 of transcription start
3F_arrow	TATA-box	ATATAT	1592	6	-	Brassica napus	core promoter element around -30 of transcription start
3F_arrow	TATA-box	TATATA	1593	6	-	Arabidopsis thaliana	core promoter element around -30 of transcription start
3F_arrow	TATA-box	ATATAA	1594	6	+	Brassica oleracea	core promoter element around -30 of transcription start
3F_arrow	TATA-box	TATA	1595	4	-	Arabidopsis thaliana	core promoter element around -30 of transcription start
3F_arrow	TATA-box	TACATAAA	1678	8	-	Oryza sativa	core promoter element around -30 of transcription start
3F_arrow	TATA-box	TATACA	1682	6	-	Helianthus annuus	core promoter element around -30 of transcription start
3F_arrow	TATA-box	TATA	1684	4	-	Arabidopsis thaliana	core promoter element around -30 of transcription start
3F_arrow	TATA-box	ATTATA	1698	6	+	Brassica napus	core promoter element around -30 of transcription start
3F_arrow	TATA-box	TATAA	1699	5	-	Arabidopsis thaliana	core promoter element around -30 of transcription start
3F_arrow	TATA-box	TATA	1700	4	-	Arabidopsis thaliana	core promoter element around -30 of transcription start
3F_arrow	TATA-box	TATAAAT	1743	7	-	Brassica juncea	core promoter element around -30 of transcription start
3F_arrow	TATA-box	TATAAA	1744	6	-	Helianthus annuus	core promoter element around -30 of transcription start
3F_arrow	TATA-box	TATAA	1745	5	-	Arabidopsis thaliana	core promoter element around -30 of transcription start
3F_arrow	TATA-box	TATA	1746	4	-	Arabidopsis thaliana	core promoter element around -30 of transcription start
3F_arrow	TATA-box	ATATAT	1797	6	-	Brassica napus	core promoter element around -30 of transcription start
3F_arrow	TATA-box	TATA	1798	4	-	Arabidopsis thaliana	core promoter element around -30 of transcription start
3F_arrow	GT1-motif	GGTTAA	1252	6	+	Arabidopsis thaliana	light responsive element
3F_arrow	AAGAA-motif	gGTAAAGAAA	746	9	+	Avena sativa
3F_arrow	Unnamed__4	CTCC	377	4	-	Petroselinum hortense
3F_arrow	Unnamed__4	CTCC	404	4	-	Petroselinum hortense
3F_arrow	Unnamed__4	CTCC	1149	4	+	Petroselinum hortense
3F_arrow	CAAT-box	CAAT	66	4	+	Nicotiana glutinosa
3F_arrow	CAAT-box	CCAAT	96	5	+	Arabidopsis thaliana	common cis-acting element in promoter and enhancer regions
3F_arrow	CAAT-box	CAAT	97	4	+	Nicotiana glutinosa
3F_arrow	CAAT-box	CAAT	136	4	-	Nicotiana glutinosa
3F_arrow	CAAT-box	CAAAT	169	5	-	Pisum sativum	common cis-acting element in promoter and enhancer regions
3F_arrow	CAAT-box	CAAAT	305	5	-	Pisum sativum	common cis-acting element in promoter and enhancer regions
3F_arrow	CAAT-box	CAAT	312	4	+	Nicotiana glutinosa
3F_arrow	CAAT-box	CAAT	436	4	-	Nicotiana glutinosa
3F_arrow	CAAT-box	CAAT	455	4	+	Nicotiana glutinosa
3F_arrow	CAAT-box	CAAT	520	4	-	Nicotiana glutinosa
3F_arrow	CAAT-box	CAAT	539	4	+	Nicotiana glutinosa
3F_arrow	CAAT-box	CAAAT	546	5	+	Pisum sativum	common cis-acting element in promoter and enhancer regions
3F_arrow	CAAT-box	CAAT	735	4	-	Nicotiana glutinosa
3F_arrow	CAAT-box	CAAT	741	4	+	Nicotiana glutinosa
3F_arrow	CAAT-box	CAAAT	899	5	+	Pisum sativum	common cis-acting element in promoter and enhancer regions
3F_arrow	CAAT-box	CAAAT	902	5	-	Pisum sativum	common cis-acting element in promoter and enhancer regions
3F_arrow	CAAT-box	CAAT	913	4	+	Nicotiana glutinosa
3F_arrow	CAAT-box	CAAT	938	4	+	Nicotiana glutinosa
3F_arrow	CAAT-box	CAAAT	977	5	-	Pisum sativum	common cis-acting element in promoter and enhancer regions
3F_arrow	CAAT-box	CAAT	1122	4	-	Nicotiana glutinosa
3F_arrow	CAAT-box	CCAAT	1186	5	-	Arabidopsis thaliana	common cis-acting element in promoter and enhancer regions
3F_arrow	CAAT-box	CAAT	1191	4	-	Nicotiana glutinosa
3F_arrow	CAAT-box	CAAT	1207	4	-	Nicotiana glutinosa
3F_arrow	CAAT-box	CCAAT	1221	5	-	Arabidopsis thaliana	common cis-acting element in promoter and enhancer regions
3F_arrow	CAAT-box	CAAT	1259	4	+	Nicotiana glutinosa
3F_arrow	CAAT-box	CAAT	1604	4	-	Nicotiana glutinosa
3F_arrow	CAAT-box	CAAT	1630	4	+	Nicotiana glutinosa
3F_arrow	CAAT-box	CAAT	1644	4	-	Nicotiana glutinosa
3F_arrow	CAAT-box	CAAT	1829	4	+	Nicotiana glutinosa
3F_arrow	CAAT-box	CCAAT	1954	5	-	Arabidopsis thaliana	common cis-acting element in promoter and enhancer regions
3F_arrow	CAAT-box	CCAAT	1978	5	+	Arabidopsis thaliana	common cis-acting element in promoter and enhancer regions
3F_arrow	CAAT-box	CAAT	1979	4	+	Nicotiana glutinosa
3F_arrow	Myb	TAACTG	797	6	-	Arabidopsis thaliana
3F_arrow	TCA-element	CCATCTTTTT	1215	9	-	Nicotiana tabacum	cis-acting element involved in salicylic acid responsiveness
3F_arrow		motif_sequence	1047	4	-	organism	short_function
3F_arrow		motif_sequence	1052	4	-	organism	short_function
3F_arrow		motif_sequence	1421	4	-	organism	short_function
3F_arrow	AT~TATA-box	TATATA	9	6	+	Arabidopsis thaliana
3F_arrow	AT~TATA-box	TATATAAA	25	8	-	Arabidopsis thaliana
3F_arrow	AT~TATA-box	TATATA	27	6	+	Arabidopsis thaliana
3F_arrow	AT~TATA-box	TATATA	29	6	+	Arabidopsis thaliana
3F_arrow	AT~TATA-box	TATATA	31	6	+	Arabidopsis thaliana
3F_arrow	AT~TATA-box	TATATA	42	6	+	Arabidopsis thaliana
3F_arrow	AT~TATA-box	TATATA	44	6	+	Arabidopsis thaliana
3F_arrow	AT~TATA-box	TATATA	46	6	+	Arabidopsis thaliana
3F_arrow	AT~TATA-box	TATATA	48	6	+	Arabidopsis thaliana
3F_arrow	AT~TATA-box	TATATA	50	6	+	Arabidopsis thaliana
[truncated: 23,827 more rows]

## Sheet: Table S7
Supplementary Table S7. Non-synonymous SNPs identified in CsMLO1 and CsMLO4 of 32 cannabis cultivars with their respective amino acid change in the resulting protein.
Chr	Genomic position	Protein position	REF	ALT
1	21631617	40	Gly (G)	Glu (E)
1	21631743	53	Gln (Q)	Glu (E)
1	21631757	57	Lys (K)	Asn (N)
1	21631973	96	Pro (P)	Gln (Q)
1	21631984	100	Asn (N)	Asp (D)
1	21631986	100	Asn (N)	Lys (K)
1	21632017	111	Pro (P)	Thr (T)
1	21634336	259	Glu (E)	Gln (Q)
1	21636224	472	Asn (N)	Thr (T)
1	21636331	508	Ala (A)	Ser (S)
1	21636334	509	Thr (T)	Ala (A)
1	21636352	515	Met (M)	Val (V)
1	21636396	529	His (H)	Gln (Q)
1	21636413	535	Gln (Q)	Pro (P)
2	92612628	114	His (H)	Gln (Q)
2	92622145	520	Thr (T)	Ala (A)
2	92622199	538	Arg (R)	Cys (C)
2	92622308	574	Glu (E)	Gly (G)
2	92622355	590	Asn (N)	Asp (D)
2	92622367	594	Thr (T)	Ala (A)
2	92622370	595	Ala (A)	Thr (T)
2	92622371	595	Ala (A)	Val (V)
2	92622385	600	Ser (S)	Ala (A)
2	92622394	603	Lys (K)	Gln (Q)
2	92622404	606	Pro (P)	Leu (L)
2	92622410	608	Pro (P)	Arg (R)
